# Supplementary material for: Sex effects on DNA methylation affect discovery in epigenome-wide association study of schizophrenia
Source: Research Square preprint supplement (doi:10.21203/rs.3.rs-3427549/v1), 2023-10-19
Supplement: Supplementary file 1 [file 893c2a68f34e7fa1208683e7.xlsx]

## Sheet: Index
Supplementary tables S10- S12 showing Gene Ontology Biological Processes enrichment of genes annotated to the top 200 CpGs associated with schizophrenia in sex-specific and sex-stratified meta-analyses
Table S10. Gene Ontology - Biological Processes: Enrichment of genes annotated to the top 200 CpGs in female sex-specific meta-analysis
Table S11. Gene Ontology - Biological Processes: Enrichment of genes annotated to the top 200 CpGs in male sex-specific meta-analysis
Table S12. Gene Ontology - Biological Processes: Enrichment of genes annotated to the top 200 CpGs in sex-stratified meta-analysis

## Sheet: Table S10
Gene Ontology - Biological Processes	Total Number of Genes	Number of Overlapping Genes	P value	Adjusted P value	Genes
Homeostatic Process	1637	27	3.37897e-07	0.00261904	PIK3CD:CROCC:PRKAA2:GBA:ITPKB:SLC30A3:GATA2:BDH2:TNF:SRF:TRAF3IP2:NCF1:NCAPG2:LYN:ADAM8:ESAM:RASA3:SLC8A3:SLC12A6:TLE3:ATP6V0D1:RPH3AL:SPNS2:PEMT:DEDD2:BRD1:FTHL17
Multicellular Organismal Level Homeostasis	739	17	8.55746e-07	0.00331644	PIK3CD:CROCC:PRKAA2:GBA:ITPKB:GATA2:TNF:SRF:TRAF3IP2:NCAPG2:LYN:ADAM8:ESAM:TLE3:SPNS2:PEMT:BRD1
Mononuclear Cell Migration	195	9	1.59518e-06	0.00352521	PIK3CD:CDC42:GBA:CXCR1:SLIT2:TNF:LYN:ADAM8:SPNS2
Positive Regulation Of Protein Catabolic Process	201	9	2.04867e-06	0.00352521	GBA:FBXO11:VGLL4:TNF:RNF19A:ADAM8:RNF40:GGA3:TAF1
Myeloid Cell Differentiation	397	12	2.51278e-06	0.00352521	PIK3CD:CDC42:TSPAN2:GBA:ITPKB:GATA2:TNF:SRF:NCAPG2:LYN:TYROBP:BRD1
Hemopoiesis	896	18	2.72884e-06	0.00352521	PIK3CD:CDC42:TSPAN2:GBA:ITPKB:HDAC4:GATA2:TNF:SRF:TRAF3IP2:NCAPG2:ASH2L:LYN:ADAM8:SLC8A3:IKZF3:TYROBP:BRD1
Inflammatory Response	816	17	3.26688e-06	0.00361736	PIK3CD:TSPAN2:GBA:AIM2:IL1R1:HDAC4:STAB1:GHSR:TNF:TTBK1:TRAF3IP2:NCF1:LYN:ADAM8:LRFN5:TYROBP:TLR7
Apoptotic Process	1858	27	3.83975e-06	0.00369489	PIK3CD:PRKAA2:GBA:AIM2:ITPKB:SIX3:FBXO11:THRB:GATA2:PLXND1:GHSR:SLIT2:TNF:EPHA7:TRAF3IP2:NCF1:LYN:FBXO10:ADAM8:PTMS:KDM2B:SMAD6:IKZF3:TYROBP:DEDD2:ANGPT4:TOMM22
Myeloid Cell Homeostasis	165	8	4.29029e-06	0.00369489	PIK3CD:ITPKB:GATA2:SRF:TRAF3IP2:NCAPG2:LYN:BRD1
Central Nervous System Development	1040	19	5.56865e-06	0.00419146	CDC42:TSPAN2:GBA:SIX3:GATA2:SLIT2:TNF:SRF:TTBK1:EPHA7:LYN:NAV2:DIXDC1:KDM2B:SLC8A3:ATP6V0D1:TYROBP:GRIN2D:TAF1
Leukocyte Differentiation	591	14	6.06875e-06	0.00419146	PIK3CD:CDC42:TSPAN2:GBA:ITPKB:HDAC4:GATA2:TNF:SRF:TRAF3IP2:LYN:ADAM8:IKZF3:TYROBP
Homeostasis Of Number Of Cells	296	10	6.79526e-06	0.00419146	PIK3CD:GBA:ITPKB:GATA2:SRF:TRAF3IP2:NCAPG2:LYN:SPNS2:BRD1
Regulation Of Intracellular Signal Transduction	1692	25	7.02992e-06	0.00419146	PIK3CD:CDC42:PRKAA2:GBA:ITPKB:VGLL4:SLIT2:GUCY1A3:RANBP9:TNF:EPHA7:TRAF3IP2:CYTH3:NCF1:GNAI1:LYN:PSCA:ADAM8:DIXDC1:MCF2L:RASA3:PLEKHG3:RAP1GAP2:TLR7:TAF1
Head Development	799	16	1.06301e-05	0.00588527	CDC42:TSPAN2:GBA:SIX3:GATA2:SLIT2:SRF:TTBK1:EPHA7:DIXDC1:KDM2B:ATP6V0D1:ANKRD11:TYROBP:GRIN2D:TAF1
Regulation Of Multicellular Organismal Development	1417	22	1.2665e-05	0.00654443	PIK3CD:ITPKB:TADA3:VGLL4:STAB1:GATA2:PLXND1:GHSR:SLIT2:TNF:PI16:SRF:TTBK1:EPHA7:CUX1:LYN:ADAM8:DIXDC1:IKZF3:TYROBP:ANGPT4:BRD1
Regulation Of Inflammatory Response	400	11	1.62032e-05	0.00784946	GBA:AIM2:IL1R1:GHSR:TNF:TTBK1:NCF1:LYN:ADAM8:LRFN5:TLR7
Regulation Of Protein Catabolic Process	346	10	2.61447e-05	0.0119204	GBA:FBXO11:VGLL4:TNF:RNF19A:ADAM8:RNF40:GABARAPL2:GGA3:TAF1
Positive Regulation Of Cell Development	426	11	2.88925e-05	0.0124414	ITPKB:PLXND1:SLIT2:TNF:SRF:TTBK1:CUX1:LYN:ADAM8:DIXDC1:TYROBP
Myeloid Leukocyte Differentiation	222	8	3.69195e-05	0.0146889	PIK3CD:CDC42:TSPAN2:GBA:GATA2:TNF:LYN:TYROBP
Cell Cell Signaling	1647	23	4.19696e-05	0.0146889	CDC42:PRKAA2:VGLL4:STAB1:GHSR:GUCY1A3:TNF:SRF:EPHA7:LYN:RNF19A:CPEB3:CPT1A:LRRC32:DIXDC1:LIN7A:SLC8A3:SLC12A6:TLE3:RPH3AL:TYROBP:GRIN2D:SYN3
Positive Regulation Of Neurogenesis	227	8	4.32257e-05	0.0146889	PLXND1:SLIT2:TNF:SRF:TTBK1:CUX1:LYN:DIXDC1
Leukocyte Apoptotic Process	114	6	4.46815e-05	0.0146889	PIK3CD:ITPKB:GHSR:TRAF3IP2:LYN:ADAM8
Regulation Of Cell Development	802	15	4.46896e-05	0.0146889	ITPKB:GATA2:PLXND1:SLIT2:TNF:SRF:TTBK1:EPHA7:CUX1:LYN:ADAM8:DIXDC1:IKZF3:TYROBP:BRD1
Neutrophil Extravasation	13	3	4.70514e-05	0.0146889	PIK3CD:IL1R1:ADAM8
Histone Modification	450	11	4.74679e-05	0.0146889	PRDM2:PADI3:PRKAA2:HDAC4:TADA3:GATA2:ASH2L:KDM2B:RNF40:BRD1:TAF1
Regulation Of Neurogenesis	373	10	4.92726e-05	0.0146889	GATA2:PLXND1:SLIT2:TNF:SRF:TTBK1:EPHA7:CUX1:LYN:DIXDC1
Positive Regulation Of Catabolic Process	538	12	5.16934e-05	0.0148398	PRKAA2:GBA:FBXO11:VGLL4:TNF:RNF19A:CPEB3:ADAM8:CPT1A:RNF40:GGA3:TAF1
Myeloid Leukocyte Activation	236	8	5.68443e-05	0.0157208	PIK3CD:GATA2:TNF:TTBK1:TRAF3IP2:LYN:LRFN5:TYROBP
Leukocyte Migration	381	10	5.88186e-05	0.0157208	PIK3CD:CDC42:GBA:IL1R1:CXCR1:SLIT2:TNF:LYN:ADAM8:SPNS2
Neuron Apoptotic Process	249	8	8.26812e-05	0.0213621	GBA:THRB:PLXND1:TNF:EPHA7:ADAM8:KDM2B:TYROBP
Regulation Of Cell Death	1609	22	8.59266e-05	0.0214844	PIK3CD:PRKAA2:GBA:ITPKB:FBXO11:GATA2:PLXND1:GHSR:SLIT2:TNF:EPHA7:LYN:FBXO10:ADAM8:PTMS:KDM2B:SMAD6:IKZF3:TYROBP:DEDD2:ANGPT4:TOMM22
Regulation Of Phosphorylation	1169	18	9.39996e-05	0.0227685	CDC42:PRKAA2:GBA:ITPKB:HDAC4:TADA3:SLIT2:TNF:TTBK1:EPHA7:NCF1:NCAPG2:LYN:ADAM8:SLC8A3:SMAD6:ANGPT4:TLR7
Synaptic Signaling	762	14	9.80901e-05	0.0230393	GHSR:GUCY1A3:TNF:SRF:EPHA7:RNF19A:CPEB3:LIN7A:SLC8A3:SLC12A6:RPH3AL:TYROBP:GRIN2D:SYN3
Regulation Of Leukocyte Apoptotic Process	87	5	0.000130368	0.02972	PIK3CD:ITPKB:GHSR:LYN:ADAM8
Regulation Of Catabolic Process	990	16	0.000136767	0.0300138	PRKAA2:GBA:FBXO11:HDAC4:VGLL4:TNF:TRAF3IP2:RNF19A:CPEB3:ADAM8:CPT1A:RNF40:ATP6V0D1:GABARAPL2:GGA3:TAF1
Negative Regulation Of Multicellular Organismal Process	1208	18	0.000141709	0.0300138	GBA:VGLL4:STAB1:GATA2:GHSR:SLIT2:GUCY1A3:TNF:PI16:SRF:EPHA7:LYN:LRRC32:LRFN5:SMAD6:TLE3:TYROBP:ANGPT4
Regulation Of Proteolysis	693	13	0.000143273	0.0300138	GBA:AIM2:COL6A3:TNF:PI16:TTBK1:EPHA7:LYN:RNF19A:ADAM8:RNF40:GABARAPL2:TAF1
Regulation Of Protein Modification Process	1441	20	0.000153223	0.0312535	PRKAA2:GBA:ITPKB:HDAC4:TADA3:GATA2:SLIT2:TNF:TTBK1:EPHA7:NCF1:NCAPG2:LYN:ADAM8:SLC8A3:SMAD6:RNF40:ANGPT4:TLR7:TAF1
Positive Regulation Of Nervous System Development	274	8	0.000159871	0.0316841	PLXND1:SLIT2:TNF:SRF:TTBK1:CUX1:LYN:DIXDC1
Regulation Of Amyloid Precursor Protein Catabolic Process	49	4	0.00016351	0.0316841	RANBP9:TNF:LYN:GGA3
Cytoskeleton Organization	1451	20	0.000167991	0.0317585	CROCC:CDC42:PRKAA2:ARPC4:GHSR:SLIT2:RANBP9:TNF:SRF:GNAI1:EFCAB1:RNF19A:SVIL:ABLIM1:DIXDC1:ESAM:MYH7:TYROBP:PLEKHG2:BFSP1
Positive Regulation Of Proteolysis	353	9	0.00017258	0.0318493	GBA:AIM2:TNF:TTBK1:LYN:RNF19A:ADAM8:RNF40:TAF1
Leukocyte Activation Involved In Inflammatory Response	50	4	0.000176961	0.0318982	TNF:TTBK1:TRAF3IP2:TYROBP
Regulation Of Neuron Apoptotic Process	211	7	0.000190753	0.0336029	GBA:PLXND1:TNF:EPHA7:ADAM8:KDM2B:TYROBP
Myeloid Cell Activation Involved In Immune Response	98	5	0.000228124	0.0392932	PIK3CD:GATA2:TNF:LYN:TYROBP
Regulation Of Nervous System Development	452	10	0.000236938	0.0394295	GATA2:PLXND1:SLIT2:TNF:SRF:TTBK1:EPHA7:CUX1:LYN:DIXDC1
Positive Regulation Of Multicellular Organismal Process	1610	21	0.000242253	0.0394295	PIK3CD:GBA:AIM2:ITPKB:IL1R1:GATA2:PLXND1:GHSR:SLIT2:TNF:SRF:TTBK1:CUX1:LYN:ADAM8:DIXDC1:KDM2B:PEMT:TYROBP:ANGPT4:TLR7
Inflammatory Cell Apoptotic Process	22	3	0.000244177	0.0394295	PIK3CD:ITPKB:GHSR
Regulation Of Defense Response	740	13	0.000271076	0.0406783	GBA:AIM2:IL1R1:GHSR:TNF:TTBK1:TRAF3IP2:NCF1:LYN:ADAM8:LRFN5:TYROBP:TLR7
Leukocyte Homeostasis	102	5	0.000274844	0.0406783	PIK3CD:ITPKB:TRAF3IP2:LYN:SPNS2
Positive Regulation Of Mirna Metabolic Process	56	4	0.000274997	0.0406783	GATA2:TNF:SRF:SMAD6
Macrophage Differentiation	56	4	0.000274997	0.0406783	CDC42:TSPAN2:GBA:GATA2
Positive Regulation Of Protein Metabolic Process	1391	19	0.000278175	0.0406783	PRKAA2:GBA:AIM2:FBXO11:HDAC4:VGLL4:RANBP9:TNF:TTBK1:EPHA7:NCF1:LYN:RNF19A:CPEB3:ADAM8:RNF40:GGA3:ANGPT4:TAF1
Circulatory System Development	1166	17	0.000283399	0.0406783	PIK3CD:CDC42:VGLL4:STAB1:GATA2:PLXND1:GHSR:SLIT2:TNF:PI16:SRF:TRAF3IP2:ADAM8:MYH7:SLC12A6:SMAD6:ANGPT4
Regulation Of Cellular Component Biogenesis	952	15	0.000293371	0.0413439	CROCC:CDC42:PRKAA2:GBA:GHSR:SLIT2:TNF:SRF:TTBK1:EPHA7:SVIL:ESAM:LRFN5:SMAD6:PLEKHG2
Regulation Of Immune System Process	1401	19	0.00030427	0.0421142	PIK3CD:AIM2:ITPKB:IL1R1:GATA2:SLIT2:TNF:TAP2:TTBK1:NCF1:LYN:ADAM8:LRRC32:LRFN5:SPNS2:IKZF3:TYROBP:BRD1:TLR7
Response To Hormone	853	14	0.000313181	0.0425372	PRKAA2:LEPR:LEPROT:GBA:TADA3:THRB:GHSR:SLIT2:TNF:SRF:GNAI1:ASH2L:LYN:SMAD6:RNF40
Positive Regulation Of Amyloid Precursor Protein Catabolic Process	24	3	0.000318302	0.0425372	RANBP9:TNF:LYN
Myeloid Leukocyte Mediated Immunity	107	5	0.000343062	0.0435552	PIK3CD:GATA2:TRAF3IP2:LYN:TYROBP
Regulation Of Trans Synaptic Signaling	474	10	0.000345237	0.0435552	GHSR:TNF:SRF:EPHA7:RNF19A:CPEB3:SLC8A3:TYROBP:GRIN2D:SYN3
Regulation Of Anatomical Structure Size	476	10	0.000356856	0.0435552	SLIT2:GUCY1A3:TNF:SRF:EPHA7:SVIL:ESAM:SLC12A6:RAP1GAP2:PLEKHG2
Regulation Of Protein Containing Complex Assembly	390	9	0.000359418	0.0435552	CDC42:GBA:SLIT2:TNF:TTBK1:SVIL:ESAM:SMAD6:PLEKHG2
Regulation Of Phosphorus Metabolic Process	1304	18	0.000359635	0.0435552	CDC42:PRKAA2:GBA:ITPKB:HDAC4:TADA3:SLIT2:TNF:TTBK1:EPHA7:NCF1:NCAPG2:LYN:ADAM8:SLC8A3:SMAD6:ANGPT4:TLR7
Positive Regulation Of Developmental Process	1304	18	0.000359635	0.0435552	PIK3CD:ITPKB:GATA2:PLXND1:GHSR:SLIT2:TNF:SRF:TTBK1:CUX1:LYN:CPEB3:ADAM8:DIXDC1:KDM2B:TYROBP:ANGPT4:BRD1
Regulation Of System Process	574	11	0.00039484	0.0470826	GBA:HDAC4:THRB:GHSR:GUCY1A3:TNF:PI16:SRF:MYH7:SLC8A3:GRIN2D
Positive Regulation Of Leukocyte Apoptotic Process	26	3	0.000405553	0.0470826	PIK3CD:LYN:ADAM8
Amyloid Precursor Protein Catabolic Process	62	4	0.000406985	0.0470826	RANBP9:TNF:LYN:GGA3
Regulation Of Muscle System Process	241	7	0.000426618	0.0486282	HDAC4:GHSR:GUCY1A3:PI16:SRF:MYH7:SLC8A3

## Sheet: Table S11
Gene Ontology - Biological Processes	Total Number of Genes	Number of Overlapping Genes	P value	Adjusted P value	Genes
Appendage Morphogenesis	143	8	2.26395e-06	0.00854469	HDAC1:AFF3:SHOX2:ZNF141:NOTCH1:LRP5:RARG:IFT140
Regulation Of Cell Substrate Adhesion	211	9	4.88366e-06	0.00854469	AJAP1:DISC1:VWC2:CDK6:NOTCH1:SPOCK2:DOCK1:FZD4:ITGA5
Response To Growth Factor	720	16	6.06795e-06	0.00854469	HDAC1:SAP130:ACVR1:NRP2:NR3C1:VWC2:MAGI2:RAPGEF1:NOTCH1:TH:FZD4:ITGA5:TMEM204:ZFHX3:NGFR:MAPK1
Embryonic Appendage Morphogenesis	117	7	6.37841e-06	0.00854469	HDAC1:AFF3:SHOX2:NOTCH1:LRP5:RARG:IFT140
Response To Endogenous Stimulus	1703	26	7.32413e-06	0.00854469	HDAC1:PRKAA2:SAP130:ACVR1:NRP2:KLF3:NR3C1:GPLD1:VWC2:MAGI2:RRAGA:RAPGEF1:NOTCH1:PTPRE:TH:KCNQ1:FZD4:RARG:ITGA5:GNG2:TMEM204:ZFHX3:NGFR:TRPM2:MAPK1:MAOB
Generation Of Neurons	1400	23	8.28319e-06	0.00854469	HDAC1:DMRTA2:SYT2:DISC1:NRP2:SHOX2:TNIK:GAK:SH3RF1:MBOAT1:VWC2:MAGI2:CDK6:RAPGEF1:NOTCH1:TH:KCNQ1:FZD4:IFT140:ZFHX3:CNP:NGFR:SHANK3
Neurogenesis	1621	25	9.4999e-06	0.00854469	HDAC1:DMRTA2:SYT2:DISC1:NRP2:SHOX2:TNIK:GAK:SH3RF1:NR3C1:MBOAT1:VWC2:MAGI2:CDK6:RAPGEF1:NOTCH1:TH:KCNQ1:FZD4:IFT140:ZFHX3:CNP:NGFR:MAPK1:SHANK3
Regulation Of Myotube Differentiation	48	5	9.50059e-06	0.00854469	HDAC1:HDAC4:SHOX2:NOTCH1:ATP11A
Appendage Development	177	8	1.09525e-05	0.00854469	HDAC1:AFF3:SHOX2:ZNF141:NOTCH1:LRP5:RARG:IFT140
Myotube Differentiation	129	7	1.21177e-05	0.00854469	HDAC1:HDAC4:SHOX2:NOTCH1:ADAM12:DOCK1:ATP11A
Regulation Of Cell Differentiation	1538	24	1.21264e-05	0.00854469	AJAP1:HDAC1:DMRTA2:DISC1:ACVR1:HDAC4:SHOX2:SH3RF1:VWC2:CDK6:NOTCH1:SPOCK2:LRP5:PLEKHB1:FZD4:RARG:ATP11A:PCID2:CUL4A:LGALS3:ZFHX3:PRKCA:MAPK1:SHANK3
Positive Regulation Of Cell Population Proliferation	950	18	1.36946e-05	0.00884558	HDAC1:DMRTA2:DISC1:NRP2:HDAC4:SHOX2:IL9:CDK6:PDCD1LG2:NOTCH1:LRP5:RARG:CUL4A:RPS15A:CLDN7:NGFR:PRKCA:MAPK1
Small Molecule Metabolic Process	1743	25	3.22263e-05	0.0188822	PRKAA2:CCBL2:RRM2:UXS1:PNKD:HDAC4:SLC2A9:SLC4A4:SERINC5:NR3C1:GPLD1:ADCYAP1R1:AHCYL2:FDFT1:TH:KCNQ1:GAL3ST3:LRP5:CDADC1:ACSF3:CNP:ACSS1:MAPK1:TST:MPST
Response To Oxygen Containing Compound	1749	25	3.41053e-05	0.0188822	PRKAA2:SYT2:KLF3:NR3C1:GPLD1:ADCYAP1R1:PDCD1LG2:RRAGA:RAPGEF1:NOTCH1:KCNMA1:PTPRE:TH:KCNQ1:LRP5:FZD4:RARG:GNG2:CLDN7:CNP:NGFR:PRKCA:TRPM2:MAPK1:MAOB
Striated Muscle Cell Differentiation	291	9	6.20464e-05	0.0320615	HDAC1:ACVR1:HDAC4:SHOX2:NOTCH1:ADAM12:DOCK1:TNNT3:ATP11A
Regulation Of Cell Adhesion	783	15	6.6222e-05	0.0320804	AJAP1:DISC1:ADAM19:VWC2:CDK6:PDCD1LG2:NOTCH1:SPOCK2:DOCK1:FZD4:ITGA5:LGALS3:ZFHX3:CLDN7:PRKCA
Response To Lipid	885	16	7.40408e-05	0.0337583	HDAC1:PRKAA2:ACVR1:NR3C1:GPLD1:ADCYAP1R1:PDCD1LG2:NOTCH1:TH:FZD4:RARG:GNG2:CNP:PRKCA:MAPK1:MAOB
Head Development	799	15	8.29688e-05	0.0349468	HDAC1:DMRTA2:DISC1:NRP2:CDK6:NOTCH1:TH:FZD4:RARG:ZFHX3:CNP:MAPK1:LIMK2:SHANK3:MAOB
Positive Regulation Of Cell Substrate Adhesion	122	6	8.962e-05	0.0349468	DISC1:VWC2:CDK6:SPOCK2:DOCK1:ITGA5
Animal Organ Morphogenesis	1001	17	9.36448e-05	0.0349468	AJAP1:HDAC1:ACVR1:NRP2:SHOX2:NPY2R:NR3C1:MAGI2:NOTCH1:TH:KCNQ1:LRP5:RARG:IFT140:NGFR:MAPK1:SHANK3
Regulation Of Multicellular Organismal Development	1417	21	9.46822e-05	0.0349468	AJAP1:HDAC1:DMRTA2:DISC1:ACVR1:SHOX2:SH3RF1:CDK6:TG:NOTCH1:ADAM12:FZD4:RARG:ITGA5:OAS2:PCID2:CUL4A:LGALS3:NGFR:PRKCA:SHANK3
Negative Regulation Of Myotube Differentiation	17	3	0.000130346	0.0448509	HDAC1:HDAC4:NOTCH1
Muscle Cell Differentiation	397	10	0.000133089	0.0448509	HDAC1:ACVR1:HDAC4:SHOX2:NOTCH1:ADAM12:DOCK1:TNNT3:ATP11A:TMEM204

## Sheet: Table S12
Gene Ontology - Biological Processes	Total Number of Genes	Number of Overlapping Genes	P value	Adjusted P value	Genes
Epithelial Cell Proliferation	476	15	1.23282e-07	0.000955555	RPS6KA1:GLUL:WNT3A:NRP2:WNT7A:SPARC:CDK6:LEP:SMO:NKX2-6:BTRC:SCARB1:DLEU2:ANGPT4:MAPK1
Tube Development	1114	21	1.87347e-06	0.00517783	SSBP3:GLUL:WNT3A:NRP2:WNT7A:STAB1:TGFBI:SPARC:HAND1:SRF:LEP:SMO:NKX2-6:BTRC:ETS1:ITGA5:DLEU2:ASB2:SMAD6:ANGPT4:MAPK1
Neurogenesis	1621	26	2.00406e-06	0.00517783	ELAVL4:IGSF9:NDUFS2:SRGAP2:WNT3A:MAP4K4:NRP2:KLF7:WNT7A:UNC5C:SRF:TTBK1:CDK6:CUX1:LEP:SMO:RAPGEF1:CTTN:PHOX2A:DIXDC1:APOA4:CNTN1:SLC8A3:GPRC5B:SEPT4:MAPK1
Circulatory System Development	1166	21	3.82298e-06	0.00629866	GLUL:TNNI1:WNT3A:NRP2:VGLL4:WNT7A:STAB1:TGFBI:SPARC:HAND1:SRF:LEP:SMO:NKX2-6:ETS1:ITGA5:DLEU2:ASB2:SMAD6:ANGPT4:MAPK1
Head Development	799	17	4.06313e-06	0.00629866	ELAVL4:SSBP3:SRGAP2:WNT3A:NRP2:WNT7A:UNC5C:SRF:TTBK1:CDK6:SMO:NKX2-6:PHOX2A:DIXDC1:FOXR1:CNTN1:MAPK1
Embryonic Heart Tube Development	83	6	8.96247e-06	0.0105126	WNT3A:HAND1:SRF:SMO:NKX2-6:ASB2
Central Nervous System Development	1040	19	9.49404e-06	0.0105126	ELAVL4:SSBP3:SRGAP2:WNT3A:NRP2:WNT7A:UNC5C:SRF:TTBK1:CDK6:LEP:SMO:NKX2-6:PHOX2A:DIXDC1:FOXR1:CNTN1:SLC8A3:MAPK1
Vasculature Development	784	16	1.33384e-05	0.0119748	GLUL:NRP2:WNT7A:STAB1:TGFBI:SPARC:HAND1:SRF:LEP:SMO:ETS1:ITGA5:DLEU2:SMAD6:ANGPT4:MAPK1
Cell Motility	1714	25	1.68273e-05	0.0119748	GLUL:SRGAP2:MAP4K4:NRP2:WNT7A:UNC5C:WWC2:F2R:SPARC:SRF:CDK6:LEP:SMO:CTTN:DIXDC1:ETS1:ITGA5:SELPLG:SCARB1:DLEU2:ASB2:SEPT4:ANGPT4:TRPM2:MAPK1
Locomotion	1395	22	1.78502e-05	0.0119748	IGSF9:GLUL:SRGAP2:WNT3A:MAP4K4:NRP2:KLF7:WNT7A:UNC5C:F2R:SPARC:SRF:CDK6:SMO:ETS1:CNTN1:ITGA5:SCARB1:DLEU2:ANGPT4:TRPM2:MAPK1
Generation Of Neurons	1400	22	1.88579e-05	0.0119748	ELAVL4:IGSF9:SRGAP2:WNT3A:MAP4K4:NRP2:KLF7:WNT7A:UNC5C:SRF:CDK6:CUX1:LEP:SMO:RAPGEF1:CTTN:PHOX2A:DIXDC1:APOA4:CNTN1:GPRC5B:SEPT4
Axon Development	469	12	1.95186e-05	0.0119748	IGSF9:WNT3A:NRP2:KLF7:WNT7A:UNC5C:SRF:SMO:CTTN:DIXDC1:APOA4:CNTN1
Tube Morphogenesis	908	17	2.13484e-05	0.0119748	GLUL:WNT3A:NRP2:WNT7A:STAB1:TGFBI:SPARC:HAND1:SRF:LEP:SMO:BTRC:ETS1:ITGA5:DLEU2:ASB2:ANGPT4
Anatomical Structure Formation Involved In Morphogenesis	1206	20	2.20692e-05	0.0119748	SSBP3:GLUL:WNT3A:NRP2:WNT7A:STAB1:TGFBI:SPARC:HAND1:SRF:LEP:SMO:TNNT3:PHOX2A:ETS1:CNTN1:ITGA5:DLEU2:ANGPT4:MAPK1
Cell Part Morphogenesis	642	14	2.3174e-05	0.0119748	ELAVL4:IGSF9:WNT3A:MAP4K4:NRP2:KLF7:WNT7A:UNC5C:SRF:CUX1:SMO:CTTN:DIXDC1:CNTN1
Endothelial Cell Migration	269	9	2.86022e-05	0.013856	GLUL:NRP2:WNT7A:SPARC:SRF:ETS1:SCARB1:DLEU2:ANGPT4
Cellular Component Morphogenesis	749	15	3.13433e-05	0.0142907	ELAVL4:IGSF9:WNT3A:MAP4K4:NRP2:KLF7:WNT7A:UNC5C:SRF:CUX1:SMO:TNNT3:CTTN:DIXDC1:CNTN1
Regulation Of Cytoskeleton Organization	496	12	3.37155e-05	0.0145183	PRKAA2:WNT3A:GNAI1:ARFIP2:CTTN:ARAP1:DIXDC1:SPTBN5:SSH2:EML2:TRPM2:MAPK1
Regulation Of Epithelial Cell Migration	281	9	4.01883e-05	0.0154629	GLUL:MAP4K4:NRP2:WNT7A:SPARC:ETS1:SCARB1:DLEU2:ANGPT4
Blood Vessel Morphogenesis	677	14	4.13121e-05	0.0154629	GLUL:NRP2:WNT7A:STAB1:TGFBI:SPARC:HAND1:SRF:LEP:SMO:ETS1:ITGA5:DLEU2:ANGPT4
Regulation Of Endothelial Cell Migration	218	8	4.20046e-05	0.0154629	GLUL:NRP2:WNT7A:SPARC:ETS1:SCARB1:DLEU2:ANGPT4
Positive Regulation Of Small Gtpase Mediated Signal Transduction	68	5	4.75738e-05	0.0154629	MAP4K4:ARHGEF3:F2R:STK19:ADCYAP1R1
Limbic System Development	112	6	4.95061e-05	0.0154629	WNT3A:NRP2:SRF:CDK6:SMO:NKX2-6
Regulation Of Cell Death	1609	23	5.2471e-05	0.0154629	RPS6KA1:PRKAA2:WNT3A:OPN3:MAP4K4:WNT7A:UNC5C:F2R:ADCYAP1R1:LEP:SMO:NKX2-6:FBXO10:CTTN:ITGA5:TRIM13:DLEU2:SMAD6:SEPT4:ANGPT4:ZBP1:TRPM2:PTTG1IP
Neuron Development	1077	18	5.33522e-05	0.0154629	ELAVL4:IGSF9:SRGAP2:WNT3A:MAP4K4:NRP2:KLF7:WNT7A:UNC5C:SRF:CUX1:LEP:SMO:RAPGEF1:CTTN:DIXDC1:APOA4:CNTN1
Embryonic Heart Tube Morphogenesis	70	5	5.47253e-05	0.0154629	WNT3A:HAND1:SRF:SMO:ASB2
Regulation Of Muscle Contraction	167	7	5.5704e-05	0.0154629	TNNI1:F2R:SRF:TNNT3:CTTN:SLC8A3:SCN4A
Tissue Migration	365	10	5.58589e-05	0.0154629	GLUL:MAP4K4:NRP2:WNT7A:SPARC:SRF:ETS1:SCARB1:DLEU2:ANGPT4
Cell Morphogenesis Involved In Differentiation	611	13	5.90117e-05	0.0157724	ELAVL4:IGSF9:WNT3A:NRP2:KLF7:WNT7A:UNC5C:SRF:CUX1:SMO:CTTN:DIXDC1:CNTN1
Regulation Of Locomotion	1090	18	6.22188e-05	0.0160753	GLUL:SRGAP2:WNT3A:MAP4K4:NRP2:WNT7A:UNC5C:F2R:SPARC:SRF:CDK6:SMO:ETS1:ITGA5:SCARB1:DLEU2:ANGPT4:MAPK1
Positive Regulation Of Epithelial Cell Migration	171	7	6.46867e-05	0.0161738	MAP4K4:NRP2:WNT7A:SPARC:ETS1:SCARB1:ANGPT4
Central Nervous System Neuron Differentiation	173	7	6.96031e-05	0.0168592	ELAVL4:WNT3A:NRP2:WNT7A:LEP:SMO:PHOX2A
Cell Morphogenesis	907	16	7.65297e-05	0.0179752	ELAVL4:IGSF9:WNT3A:MAP4K4:NRP2:KLF7:WNT7A:UNC5C:SPARC:SRF:CUX1:SMO:CTTN:ARAP1:DIXDC1:CNTN1
Forebrain Development	385	10	8.69113e-05	0.0198132	ELAVL4:SRGAP2:WNT3A:NRP2:WNT7A:SRF:CDK6:SMO:NKX2-6:DIXDC1
Cardiac Chamber Morphogenesis	125	6	9.12667e-05	0.0202117	TNNI1:NRP2:HAND1:SRF:SMO:SMAD6
Positive Regulation Of Endothelial Cell Migration	126	6	9.53775e-05	0.0205353	NRP2:WNT7A:SPARC:ETS1:SCARB1:ANGPT4
Ameboidal Type Cell Migration	480	11	0.000116775	0.0238484	GLUL:MAP4K4:NRP2:WNT7A:SPARC:SRF:SMO:ETS1:SCARB1:DLEU2:ANGPT4
Heart Morphogenesis	254	8	0.000122087	0.0238484	TNNI1:WNT3A:NRP2:HAND1:SRF:SMO:ASB2:SMAD6
Negative Regulation Of Developmental Process	945	16	0.000123034	0.0238484	SRGAP2:WNT3A:KLF7:VGLL4:WNT7A:STAB1:WWC2:SPARC:CDK6:LEP:SMO:DIXDC1:DLEU2:SMAD6:ANGPT4:MAPK1
Skeletal Muscle Contraction	44	4	0.000123072	0.0238484	TNNI1:TNNT3:SLC8A3:SCN4A
Positive Regulation Of Protein Metabolic Process	1391	20	0.000157894	0.029236	PRKAA2:AIM2:WNT3A:VGLL4:WNT7A:F2R:TTBK1:LEP:CCNY:BTRC:TNKS1BP1:CNTN1:ITGA5:DLEU2:GPRC5B:SEPT4:GGA3:ANGPT4:PTTG1IP:MAPK1
Positive Regulation Of Locomotion	584	12	0.00015842	0.029236	SRGAP2:MAP4K4:NRP2:WNT7A:F2R:SPARC:SMO:ETS1:ITGA5:SCARB1:ANGPT4:MAPK1
Negative Regulation Of Cell Death	979	16	0.000183983	0.0331641	RPS6KA1:PRKAA2:WNT3A:OPN3:MAP4K4:WNT7A:F2R:ADCYAP1R1:LEP:SMO:NKX2-6:CTTN:ITGA5:SMAD6:ANGPT4:PTTG1IP
Embryo Development	1096	17	0.000212776	0.0374824	SLC35E2B:SLC35E2:SSBP3:WNT3A:AFF3:NRP2:WNT7A:HAND1:SRF:SMO:NCAPG2:NKX2-6:ITGA5:ASB2:SMAD6:XYLT1:CMIP:MAPK1
Regulation Of Filopodium Assembly	51	4	0.000219551	0.0378164	SRGAP2:SRF:ARAP1:TRPM2
Positive Regulation Of Molecular Function	1429	20	0.000225387	0.0379777	AIM2:WNT3A:MAP4K4:F2R:SRF:TTBK1:ADCYAP1R1:LEP:SMO:RAPGEF1:CCNY:BTRC:TNNT3:ARAP1:APOA4:SCARB1:TRIM13:DLEU2:GPRC5B:MAPK1
Regulation Of Anatomical Structure Morphogenesis	899	15	0.000236849	0.03906	GLUL:WNT3A:WNT7A:STAB1:SPARC:SRF:CUX1:LEP:SMO:ARAP1:DIXDC1:ETS1:ITGA5:DLEU2:ANGPT4
Cell Proliferation In Forebrain	22	3	0.000271529	0.0429515	WNT3A:WNT7A:DIXDC1
Intestinal Lipid Absorption	22	3	0.000271529	0.0429515	LEP:APOA4:SCARB1
Cell Junction Organization	716	13	0.000281774	0.0436807	IGSF9:SRGAP2:WNT3A:MAP4K4:NRP2:WNT7A:F2R:SRF:RAPGEF1:NRXN2:CTTN:ITGA5:SLC8A3
Regulation Of Intracellular Signal Transduction	1692	22	0.000300146	0.0456163	RPS6KA1:TSSK3:PRKAA2:MAP4K4:VGLL4:WNT7A:ARHGEF3:WWC2:F2R:STK19:ADCYAP1R1:GNAI1:LEP:BTRC:ARAP1:DIXDC1:TRIM13:DLEU2:GPRC5B:SEPT4:PTTG1IP:MAPK1
Neuron Projection Guidance	220	7	0.000306861	0.04574	IGSF9:WNT3A:NRP2:KLF7:UNC5C:SMO:CNTN1
Positive Regulation Of Hepatic Stellate Cell Activation	5	2	0.000330423	0.0482245	RPS6KA1:LEP
Multicellular Organismal Movement	57	4	0.000337824	0.0482245	TNNI1:TNNT3:SLC8A3:SCN4A
Positive Regulation Of Catalytic Activity	1035	16	0.000342194	0.0482245	AIM2:WNT3A:MAP4K4:F2R:TTBK1:ADCYAP1R1:LEP:RAPGEF1:CCNY:BTRC:ARAP1:APOA4:SCARB1:DLEU2:GPRC5B:MAPK1
Protein Deglycosylation	24	3	0.000353849	0.0489764	TRIM13:UGGT2:MAN2B1
