# Supplementary material for: Sex effects on DNA methylation affect discovery in epigenome-wide association study of schizophrenia
Source: Research Square preprint supplement (doi:10.21203/rs.3.rs-3427549/v1), 2023-10-19
Supplement: Supplementary file 2 [file 9be1b4c991eeea498f9fcd3d.xlsx]

## Sheet: Index
Supplementary tables S13-S15 showing Gene Ontology Cellular Components enrichment of genes annotated to the top 200 CpGs associated with schizophrenia in sex-specific and sex-stratified meta-analyses
Table S13. Gene Ontology - Cellular Components: Enrichment of genes annotated to the top 200 CpGs in female sex-specific meta-analysis
Table S14. Gene Ontology - Cellular Components: Enrichment of genes annotated to the top 200 CpGs in male sex-specific meta-analysis
Table S15. Gene Ontology - Cellular Components: Enrichment of genes annotated to the top 200 CpGs in sex-stratified meta-analysis

## Sheet: Table S13
Gene Ontology - Cellular Components	Total Number of Genes	Number of Overlapping Genes	P value	Adjusted P value	Genes
Glutamatergic Synapse	396	11	1.47634e-05	0.0148963	CDC42:SLC30A3:PLXND1:GHSR:GUCY1A3:EPHA7:LYN:RNF19A:LRFN5:GRIN2D:SYN3
Neuron To Neuron Synapse	361	10	3.74436e-05	0.0188903	SLC30A3:EPHA7:LYN:RNF19A:CPEB3:LIN7A:LRFN5:SLC8A3:GRIN2D:SYN3
Hippocampal Mossy Fiber To Ca3 Synapse	41	4	8.09062e-05	0.0272114	SLC30A3:EPHA7:RNF19A:GRIN2D
Phagocytic Vesicle	136	6	0.000119093	0.0300411	CDC42:TAP2:NCF1:ADAM8:ATP6V0D1:TLR7
Extrinsic Component Of Membrane	279	8	0.000180841	0.0364937	PIK3CD:GBA:CYTH3:NCF1:GNAI1:LYN:MCF2L:SYN3
Cell Body	547	11	0.000262731	0.0441826	CDC42:PRKAA2:PLXND1:TNF:TTBK1:EPHA7:NCF1:TRPM5:DIXDC1:SLC8A3:BRD1

## Sheet: Table S14
Gene Ontology - Cellular Components	Total Number of Genes	Number of Overlapping Genes	P value	Adjusted P value	Genes
Cell Cell Junction	495	13	8.26817e-06	0.00834258	AJAP1:SYNPO:ADCYAP1R1:MAGI2:NOTCH1:TNKS1BP1:FZD4:TRIM29:ITGA5:TMEM204:UBN1:CLDN7:NGFR
Anchoring Junction	859	16	5.21666e-05	0.0252839	AJAP1:LPP:GAK:SYNPO:ADCYAP1R1:MAGI2:NOTCH1:TNKS1BP1:FZD4:TRIM29:ITGA5:TMEM204:UBN1:CLDN7:NGFR:MAPK1
Synapse	1394	21	7.51752e-05	0.0252839	SYT2:DISC1:NRP2:PNKD:TNIK:GAK:RGS12:NR3C1:SYNPO:VWC2:MAGI2:KCNMA1:TH:FZD4:ITGA5:RPS15A:CNP:NGFR:MAPK1:MPST:SHANK3
Receptor Complex	387	10	0.00010809	0.0272657	CD247:ACVR1:NRP2:AHRR:ADCYAP1R1:VWC2:GPR20:NOTCH1:LRP5:ITGA5

## Sheet: Table S15
Gene Ontology - Cellular Components	Total Number of Genes	Number of Overlapping Genes	P value	Adjusted P value	Genes
Plasma Membrane Raft	114	6	5.46661e-05	0.027745	F2R:ADCYAP1R1:SMO:SELPLG:SCARB1:MAPK1
Synapse	1394	21	5.49951e-05	0.027745	RPS6KA1:ELAVL4:KCNC4:IGSF9:GLUL:WNT3A:NRP2:WNT7A:UNC5C:F2R:MAL2:NRXN2:CTTN:DIXDC1:APOA4:CNTN1:ITGA5:SLC8A3:RPS15A:SEPT4:MAPK1
Golgi Apparatus	1579	22	0.00011305	0.0329972	SLC35E2B:SLC35E2:PRKAA2:CAMK1G:WNT3A:VAMP5:WNT7A:B3GALNT1:F2R:TGFBI:CUX1:SMO:ARFIP2:GAL3ST3:CTTN:ARAP1:ITGA5:SMAD6:MSLN:XYLT1:GGA3:MAPK1:CRELD2
Caveola	84	5	0.000130811	0.0329972	F2R:ADCYAP1R1:SMO:SCARB1:MAPK1
Neuron Projection	1300	19	0.000189944	0.0383307	ELAVL4:PRKAA2:KCNC4:IGSF9:GLUL:CAMK1G:OPN3:NRP2:UNC5C:ADCYAP1R1:SMO:TRPM5:CTTN:DIXDC1:CNTN1:SLC8A3:SPTBN5:SEPT4:TRPM2
Somatodendritic Compartment	809	14	0.000266809	0.038904	ELAVL4:PRKAA2:KCNC4:IGSF9:GLUL:UNC5C:TTBK1:SMO:TRPM5:CTTN:DIXDC1:SLC8A3:SEPT4:TRPM2
Axon	619	12	0.000269899	0.038904	ELAVL4:PRKAA2:KCNC4:IGSF9:GLUL:NRP2:UNC5C:CTTN:DIXDC1:CNTN1:SLC8A3:SEPT4
Cell Body	547	11	0.000358892	0.0452652	ELAVL4:PRKAA2:KCNC4:GLUL:UNC5C:TTBK1:TRPM5:DIXDC1:SLC8A3:SEPT4:TRPM2
