# Supplementary material for: Sex effects on DNA methylation affect discovery in epigenome-wide association study of schizophrenia
Source: Research Square preprint supplement (doi:10.21203/rs.3.rs-3427549/v1), 2023-10-19
Supplement: Supplementary file 3 [file a3686c7fa649c69f49c417f9.xlsx]

## Sheet: Index
Supplementary tables S1-S4 showing the top 200 CpGs, their annotations, and meta-analyses results
Table S1: The top 200 CpGs from meta-analysis of the female sex-specific EWAS of ABR, UCL, TOP and IoPPN cohorts
Table S2: The top 200 CpGs from meta-analysis of the male sex-specific EWAS of ABR, UCL, TOP and IoPPN cohorts
Table S3: The top 200 CpGs from meta-analysis of the sex-stratified EWAS of ABR, UCL, TOP and IoPPN cohorts
Table S4: The top 200 CpGs from meta-analysis of the sex-adjusted EWAS of ABR, UCL, TOP and IoPPN cohorts

## Sheet: Table S1
ProbeID	Chromosome	Position	Relation to Island	UCSC Reference Gene Name	UCSC Referenc Gene Group	Number of Cohorts	All_Effect_Fixed	All_Effect_SE_Fixed	All_P_Fixed	All_Effect_Random	All_Effect_SE_Random	All_P_Random	All_tau	All_I2	All_Q	All_Het.P	beta_UCL	SE_UCL	beta_Aberdeen	SE_Aberdeen	beta_IoPPN	SE_IoPPN	beta_TOP	SE_TOP
cg04276536	chr16	57567813	N_Shelf	CCDC102A	5'UTR	3	-0.00849679	0.00151309	1.95961e-08	-0.00849679	0.00151309	1.95961e-08	0	0	0.190078	0.909338	-0.00948695	0.0026894	-0.00815397	0.00211757	-0.00788806	0.0028267
cg18096987	chr3	11623873	OpenSea	VGLL4;VGLL4;VGLL4	Body;TSS200;Body	4	-0.00976377	0.00180159	5.97535e-08	-0.00976926	0.00181954	7.91409e-08	0.000408861	0	2.02279	0.567691	-0.00490342	0.00552866	-0.0103128	0.00354772	-0.016291	0.0050184	-0.00922817	0.00230255
cg11854073	chr3	112013357	OpenSea	SLC9A10	TSS1500	2	0.0280483	0.00531742	1.32905e-07	0.0280483	0.00531742	1.32905e-07	0	0	0.00950748	0.922324	0.0277044	0.00632524			0.0287331	0.00786318
cg11067407	chr11	113599852	OpenSea			4	0.00843505	0.00165129	3.25293e-07	0.0084253	0.00169118	6.29643e-07	0.000577506	0.094545	3.31325	0.345803	0.0139142	0.00406867	0.00408279	0.00372898	0.00521088	0.0052365	0.0088402	0.00206217
cg22717593	chr19	45647012	N_Shore			4	0.00608429	0.00125247	1.18673e-06	0.00608429	0.00125247	1.18673e-06	0	0	1.8364	0.607047	0.0103069	0.00346592	0.00573036	0.00309218	0.00741629	0.00360499	0.00519333	0.0015045
cg02934509	chr1	1669413	N_Shore	SLC35E2	Body	2	0.00923511	0.00193689	1.8606e-06	0.00923511	0.00193689	1.8606e-06	0	0	0.0686002	0.793386	0.00966908	0.00244339			0.00861421	0.00259584
cg22659676	chr5	139525919	Island			4	-0.00759257	0.00157638	1.46123e-06	-0.00762469	0.00161085	2.20863e-06	0.000520411	0.0969846	3.3222	0.344564	-0.00999211	0.00419618	-0.00549551	0.00328609	-0.0174536	0.00538242	-0.00673533	0.0019696
cg06221259	chr5	137774471	OpenSea	REEP2	TSS1500	4	-0.00751075	0.00159106	2.35152e-06	-0.00751075	0.00159106	2.35152e-06	0	0	1.85295	0.603481	-0.0123479	0.00467666	-0.009194	0.00327984	-0.0050301	0.00360878	-0.00641589	0.00210176
cg01717524	chr1	120204880	OpenSea			4	0.00734498	0.00156975	2.8817e-06	0.00734498	0.00156975	2.8817e-06	0	0	0.955863	0.81193	0.0061372	0.00393447	0.00662903	0.00320696	0.0122177	0.00466669	0.00727022	0.00204411
cg20985755	chr3	24536474	Island	THRB;THRB;THRB	TSS200;TSS200;TSS1500	4	0.00801914	0.00172223	3.22011e-06	0.00801914	0.00172223	3.22011e-06	0	0	1.37174	0.712171	0.00657039	0.00510234	0.00398634	0.00411093	0.00820101	0.00493877	0.00935062	0.00206239
cg07600998	chr1	147146108	S_Shelf			4	0.00556553	0.0012005	3.5521e-06	0.00556553	0.0012005	3.5521e-06	0	0	1.79058	0.616987	0.00258498	0.00317105	0.00771901	0.00242699	0.0071428	0.00370015	0.00517972	0.00154078
cg25784220	chr19	58609602	Island	ZSCAN18;ZSCAN18;ZSCAN18;ZSCAN18;ZSCAN18;ZSCAN18;ZSCAN18	1stExon;Body;5'UTR;1stExon;1stExon;5'UTR;5'UTR	4	0.0086302	0.00178953	1.41699e-06	0.00867121	0.00188919	4.43455e-06	0.000961018	0	2.63322	0.451695	0.00839352	0.00408238	0.0153707	0.00484801	0.00376451	0.00495652	0.00804163	0.00221759
cg03353474	chr6	32133550	N_Shore	EGFL8	5'UTR	2	-0.0160755	0.00351409	4.77159e-06	-0.0160755	0.00351409	4.77159e-06	0	0	0.27047	0.603017	-0.014735	0.00419997			-0.018627	0.00514909
cg08610076	chr13	114890016	OpenSea	RASA3	Body	4	0.00797711	0.00174491	4.83891e-06	0.00797711	0.00174491	4.83891e-06	0	0	2.00558	0.571249	0.00979785	0.00450747	0.0102934	0.00371865	0.0131829	0.00532606	0.00597949	0.00220784
cg00674365	chr19	57019069	Island	ZNF471	TSS200	4	0.0101502	0.00222356	4.99844e-06	0.0101502	0.00222356	4.99844e-06	0	0	2.48018	0.478883	0.0171458	0.00611585	0.0135287	0.00480519	0.00600508	0.00672681	0.00811731	0.00276298
cg09821533	chr6	13712174	Island	RANBP9	TSS1500	4	-0.00219407	0.000481278	5.1436e-06	-0.00219407	0.000481278	5.1436e-06	0	0	1.94209	0.584512	-0.00190684	0.00184791	-0.00408102	0.00178825	0.000335173	0.00239182	-0.00213974	0.000501822
cg02836487	chr3	128206457	Island	GATA2;GATA2;GATA2	5'UTR;5'UTR;5'UTR	4	-0.00241971	0.00053254	5.5271e-06	-0.00241971	0.00053254	5.5271e-06	0	0	0.760334	0.858929	-0.00357861	0.00168133	-0.00200447	0.000874129	-0.00289627	0.00132572	-0.00236421	0.00077519
cg26827373	chr19	12175935	Island	ZNF844	Body	4	0.0103771	0.00224718	3.87739e-06	0.0104361	0.00230181	5.79137e-06	0.000784658	0	2.71366	0.437912	0.0108593	0.00634225	0.018914	0.00563116	0.0087406	0.00528114	0.00850065	0.00277803
cg17206420	chr2	27482803	N_Shelf	SLC30A3	Body	4	0.00669026	0.00129225	2.25219e-07	0.00686082	0.00151711	6.11756e-06	0.00127292	0	2.97675	0.395224	0.00841962	0.00368465	0.0103183	0.00274696	0.00283904	0.00420767	0.00555049	0.00158867
cg06191091	chr17	30583855	OpenSea			4	0.00579207	0.00128288	6.33462e-06	0.00579207	0.00128288	6.33462e-06	0	0	0.470999	0.925215	0.00821877	0.0042604	0.00659798	0.00305271	0.00572296	0.00348685	0.00529862	0.0015236
cg10016717	chr17	88246	S_Shelf	RPH3AL	Body	4	0.00195514	0.000433267	6.40505e-06	0.00195514	0.000433267	6.40505e-06	0	0	1.39358	0.707041	0.00382171	0.00272574	0.00369791	0.00261227	0.00382025	0.00245232	0.00181877	0.000429263
cg27544405	chr1	14108975	OpenSea	PRDM2;PRDM2;PRDM2;PRDM2	Body;Body;Body;Body	3	0.0119153	0.00264654	6.72508e-06	0.0119153	0.00264654	6.72508e-06	0	0	1.01459	0.602122	0.0148479	0.00401748	0.008913	0.00410284	0.0120062	0.00518316
cg03260566	chr4	20256841	Island	SLIT2	Body	4	0.00267079	0.000594895	7.13866e-06	0.00267079	0.000594895	7.13866e-06	0	0	0.229037	0.972771	0.0020761	0.00281481	0.00212185	0.00222061	0.00391918	0.00310873	0.0027156	0.000611152
cg13790259	chr19	42704706	S_Shore	DEDD2	Body	4	-0.00688518	0.00153563	7.33879e-06	-0.00688518	0.00153563	7.33879e-06	0	0	1.02948	0.794119	-0.00797577	0.00369244	-0.00439356	0.00322146	-0.00962545	0.00382832	-0.00693103	0.0020709
cg04876835	chr1	57111099	Island	PRKAA2	1stExon	3	0.00917621	0.00204843	7.47677e-06	0.00917621	0.00204843	7.47677e-06	0	0	0.294082	0.863259	0.00796266	0.00317595	0.0106167	0.00357678	0.00925081	0.00324512
cg04519550	chr16	89349466	S_Shore	ANKRD11	Body	4	0.00732149	0.00164082	8.11656e-06	0.00732149	0.00164082	8.11656e-06	0	0	2.05889	0.560274	0.00760241	0.00430838	0.00266845	0.00363299	0.00961372	0.00487182	0.00853265	0.00204821
cg27207470	chr11	111848326	Island	DIXDC1;DIXDC1;DIXDC1	1stExon;5'UTR;Body	3	0.0168111	0.00380148	9.76757e-06	0.0168111	0.00380148	9.76757e-06	0	0	0.458053	0.795307	0.0199194	0.00584837	0.014323	0.00561905	0.016057	0.00808698
cg17795258	chr19	12377690	S_Shore			4	-0.00300246	0.000679665	9.98226e-06	-0.00300246	0.000679665	9.98226e-06	0	0	1.07222	0.783785	-0.00423905	0.00359593	-0.000191811	0.00349105	-0.00576178	0.00403802	-0.00299418	0.000679902
cg07793148	chr1	9712988	Island	C1orf200;PIK3CD	Body;5'UTR	4	-0.00910424	0.0020633	1.022e-05	-0.00910424	0.0020633	1.022e-05	0	0	1.05703	0.787455	-0.0106608	0.00579068	-0.0117259	0.00451062	-0.00340374	0.00618808	-0.00864422	0.00254621
cg14178364	chr9	37529128	OpenSea	FBXO10	Body	3	0.0114661	0.00259837	1.02032e-05	0.0114651	0.00260122	1.04527e-05	0.000194467	0	1.94337	0.378445	0.0155008	0.00398641	0.00992068	0.00374662	0.00509511	0.00599859
cg09151742	chr12	122018897	S_Shore	KDM2B;KDM2B;KDM2B	5'UTR;1stExon;TSS1500	4	-0.00641373	0.00145963	1.11249e-05	-0.00641373	0.00145963	1.11249e-05	0	0	0.680235	0.877843	-0.00596833	0.00393406	-0.00861208	0.00300559	-0.00597292	0.00358115	-0.00563266	0.00192849
cg06036471	chr10	93861385	OpenSea	CPEB3	Body	4	0.00767294	0.00174996	1.16186e-05	0.00767294	0.00174996	1.16186e-05	0	0	2.25747	0.520717	0.0110036	0.00407861	0.00641522	0.0031454	0.00210569	0.00422431	0.00898183	0.00263052
cg08416522	chr21	30451568	OpenSea	C21orf7	TSS1500	4	-0.00306309	0.000700345	1.22161e-05	-0.00306309	0.000700345	1.22161e-05	0	0	1.3012	0.728848	-0.00348081	0.00246228	-0.00365797	0.00129828	-0.00430483	0.00156063	-0.00227187	0.000949242
cg06800849	chr16	89180587	OpenSea	ACSF3;ACSF3;ACSF3	Body;Body;Body	4	0.00700315	0.00154607	5.90837e-06	0.00700859	0.00161291	1.39088e-05	0.000685156	0	2.77756	0.427207	0.00841401	0.00443501	0.00311206	0.00351555	0.0146749	0.00541899	0.00719978	0.00184371
cg16987305	chr1	65991596	Island	LEPR;LEPR;LEPR	5'UTR;5'UTR;5'UTR	4	0.00283601	0.000656765	1.57343e-05	0.00283601	0.000656765	1.57343e-05	0	0	0.208179	0.976258	0.00325976	0.00241279	0.00323852	0.00234507	0.00434477	0.00366579	0.00273373	0.000687044
cg26278699	chr2	238322972	OpenSea	COL6A3;COL6A3;COL6A3;COL6A3;COL6A3	TSS200;TSS200;TSS200;TSS200;TSS200	4	0.00803891	0.00181544	9.50741e-06	0.00809165	0.00188271	1.72451e-05	0.000745411	0.18846	3.69668	0.296135	0.0108795	0.00440928	0.0142904	0.00479604	-0.0005285	0.00618462	0.00687793	0.00216532
cg09637172	chr6	31545252	N_Shelf	TNF	Body	3	0.0117528	0.00274615	1.8713e-05	0.0117528	0.00274615	1.8713e-05	0	0	0.271167	0.873206	0.013975	0.00528996	0.0115897	0.00392937	0.0100216	0.00448371
cg09022230	chr7	5457225	N_Shore	TNRC18	Body	4	-0.0102433	0.00239563	1.9042e-05	-0.0102433	0.00239563	1.9042e-05	0	0	0.241801	0.970575	-0.0125093	0.00619429	-0.00827149	0.00597071	-0.0092883	0.00853424	-0.0102561	0.00284163
cg14294658	chr11	17994507	OpenSea	SERGEF	Body	4	0.00549448	0.00122597	7.40362e-06	0.00547953	0.00128157	1.90601e-05	0.000593534	0	2.18407	0.535093	0.00607007	0.00335986	0.00721394	0.0026022	-0.000232973	0.0037171	0.00555948	0.00153394
cg01678084	chr15	67022087	OpenSea	SMAD6;SMAD6;SMAD6	Body;Body;Body	4	0.00679898	0.0015988	2.11347e-05	0.00679898	0.0015988	2.11347e-05	0	0	0.691377	0.87523	0.00960847	0.0045296	0.00641435	0.00334026	0.00907506	0.00457802	0.0060549	0.00201538
cg22226765	chr17	73257283	Island	GGA3;MRPS7;GGA3	Body;TSS1500;Body	4	-0.00194484	0.000459727	2.33243e-05	-0.00194484	0.000459727	2.33243e-05	0	0	1.32581	0.723012	-0.00196928	0.0012167	-0.00165347	0.000874687	-0.00337488	0.00115019	-0.00173673	0.000631483
cg09360044	chr2	68557960	OpenSea			3	0.00991494	0.00234913	2.43552e-05	0.00991494	0.00234913	2.43552e-05	0	0	0.733897	0.692845	0.0126971	0.00417459	0.00930469	0.00307971	0.00657573	0.00534158
cg02824202	chr18	6729810	Island			4	0.00977752	0.00215973	5.97705e-06	0.0100954	0.00239553	2.50579e-05	0.00178842	0	2.55281	0.465823	0.0154947	0.00504598	0.0105333	0.00474514	0.0137001	0.00569589	0.00686939	0.00284946
cg27541604	chr1	159046451	OpenSea	AIM2;AIM2	5'UTR;1stExon	4	0.00740457	0.00175735	2.51469e-05	0.00740457	0.00175735	2.51469e-05	0	0	0.445473	0.930697	0.00994056	0.00435419	0.00599635	0.00394361	0.00735863	0.00535919	0.00724946	0.00220725
cg04920683	chr4	2043614	Island	C4orf48;C4orf48	TSS200;TSS200	4	-0.00083557	0.000198451	2.54856e-05	-0.00083557	0.000198451	2.54856e-05	0	0	1.53694	0.673772	-0.00161697	0.00123481	-0.0019692	0.00110848	-0.000430328	0.00121708	-0.000782425	0.000196775
cg19507068	chr7	79764176	Island	GNAI1;GNAI1	1stExon;5'UTR	4	0.00592222	0.00140715	2.56891e-05	0.00592222	0.00140715	2.56891e-05	0	0	0.736254	0.864645	0.00676591	0.00272492	0.00730334	0.0030459	0.00685239	0.0036896	0.00460276	0.00203004
cg17316300	chr2	237381593	OpenSea	IQCA1	Body	4	0.00574328	0.0013683	2.70007e-05	0.00574328	0.0013683	2.70007e-05	0	0	2.8593	0.413832	0.00097912	0.00440719	0.00987788	0.00322426	0.00742659	0.00534187	0.00523762	0.0015737
cg11503833	chr11	492997	N_Shore			4	0.00499711	0.00119181	2.75454e-05	0.00499711	0.00119181	2.75454e-05	0	0	0.746714	0.862165	0.00773933	0.00341958	0.00518049	0.00275722	0.00528239	0.00412077	0.00446123	0.00141604
cg00668927	chr7	74202486	Island	NCF1	Body	2	0.0115501	0.00248425	3.33034e-06	0.0117377	0.00281029	2.95779e-05	0.00177099	0.182203	1.2228	0.268812	0.00965824	0.00292622			0.0154939	0.00374724
cg26829395	chr15	40217855	OpenSea			4	0.00749278	0.00179409	2.96211e-05	0.00749278	0.00179409	2.96211e-05	0	0	1.87091	0.599627	0.00274516	0.00463462	0.00634244	0.00382383	0.0121336	0.00487941	0.00835437	0.00231222
cg09313046	chr16	74331618	S_Shore	PSMD7	Body	4	-0.0149591	0.00358559	3.01937e-05	-0.0149591	0.00358559	3.01937e-05	0	0	0.946655	0.814157	-0.0112742	0.00779713	-0.0159113	0.00750701	-0.00837777	0.00874817	-0.0177793	0.00505322
cg13519373	chr2	219030898	OpenSea	CXCR1	5'UTR	4	0.00569472	0.00136574	3.04985e-05	0.00569472	0.00136574	3.04985e-05	0	0	2.32098	0.508514	0.00506257	0.00341755	0.000866685	0.00357988	0.0084252	0.00547999	0.00669855	0.00159826
cg04346572	chr20	17512294	S_Shore	BFSP1;BFSP1	Body;TSS1500	4	-0.00438873	0.00105253	3.05e-05	-0.00438873	0.00105253	3.05e-05	0	0	0.657766	0.88309	-0.00463721	0.00306696	-0.00396501	0.00201551	-0.00659697	0.00256008	-0.00397985	0.00141669
cg15169121	chr2	177534417	OpenSea			4	0.011047	0.00265228	3.11217e-05	0.011047	0.00265228	3.11217e-05	0	0	0.569775	0.903315	0.00910413	0.00624073	0.0117721	0.00520483	0.00637897	0.00693638	0.0124981	0.00367964
cg06182322	chr3	9834204	Island	TADA3;ARPC4;TADA3;ARPC4;ARPC4;TADA3;TADA3	5'UTR;TSS200;1stExon;TSS200;TSS200;1stExon;5'UTR	4	0.000898324	0.000215832	3.15262e-05	0.000898324	0.000215832	3.15262e-05	0	0	1.07716	0.782591	0.00233634	0.00213799	0.00147091	0.00193654	-0.00098565	0.00212176	0.000895586	0.000208928
cg02488934	chr1	156422580	N_Shelf			4	0.00663617	0.00159517	3.18014e-05	0.00663617	0.00159517	3.18014e-05	0	0	1.75923	0.623847	0.00521716	0.00495119	0.00374866	0.00311533	0.0105429	0.00395607	0.00742705	0.00208962
cg01276201	chr10	134613136	Island			2	-0.0139779	0.00336633	3.29203e-05	-0.0139779	0.00336633	3.29203e-05	0	0	0.383119	0.535939	-0.0196685	0.00953668			-0.0132364	0.00307783
cg21816330	chr17	27044629	Island	RAB34;RAB34;RAB34;RAB34;RAB34;RAB34;RAB34;RAB34;RAB34	Body;Body;5'UTR;Body;5'UTR;1stExon;Body;Body;1stExon	4	0.00993824	0.00239818	3.41184e-05	0.00993824	0.00239818	3.41184e-05	0	0	1.2129	0.749913	0.0103574	0.00639404	0.0117382	0.00622878	0.000593166	0.00764335	0.0105542	0.00283129
cg02980023	chr3	52558373	N_Shore	STAB1	3'UTR	4	0.00466304	0.00112547	3.42525e-05	0.00466304	0.00112547	3.42525e-05	0	0	0.255278	0.968208	0.00485773	0.00373629	0.00432961	0.00265798	0.00655454	0.00346632	0.0045278	0.00131695
cg05654164	chr1	85725892	S_Shore	C1orf52;C1orf52	TSS1500;TSS1500	4	0.00673439	0.00156854	1.75946e-05	0.00682164	0.00164684	3.43882e-05	0.000740244	0.0181027	3.05531	0.383176	0.014467	0.00469749	0.00759264	0.00399103	0.00490588	0.00450636	0.00559392	0.00184535
cg05814312	chr10	29760687	OpenSea	SVIL;SVIL	Body;Body	4	0.0122406	0.00288008	2.137e-05	0.0121846	0.0029496	3.61305e-05	0.00109227	0	2.43949	0.486327	0.00627244	0.0064811	0.00794418	0.00564062	0.0181868	0.00910763	0.0158803	0.00392442
cg05331856	chr13	40516584	OpenSea			4	0.00664588	0.00160968	3.64827e-05	0.00664588	0.00160968	3.64827e-05	0	0	0.224057	0.973615	0.00852769	0.00476593	0.00712806	0.0035489	0.00560239	0.00432942	0.00636257	0.00199396
cg04343242	chr4	104000066	S_Shelf	BDH2	3'UTR	3	-0.0102763	0.00249095	3.70018e-05	-0.0102763	0.00249095	3.70018e-05	0	0	0.288227	0.865789	-0.00852637	0.00395248	-0.0113777	0.00406814	-0.0112083	0.00414517
cg10922232	chr17	73238491	OpenSea	GGA3;GGA3	Body;Body	4	0.00640279	0.00155247	3.71908e-05	0.00640279	0.00155247	3.71908e-05	0	0	0.642113	0.886727	0.00379959	0.00411772	0.00549989	0.0033119	0.00696952	0.0041909	0.00730858	0.00198973
cg23214764	chr11	86511210	Island	PRSS23	TSS1500	4	-0.00467774	0.00114017	4.08426e-05	-0.00467774	0.00114017	4.08426e-05	0	0	1.88082	0.597508	-0.00665132	0.00397724	-0.00566314	0.00230037	-0.00788419	0.00306997	-0.00343338	0.00142243
cg19851291	chr19	36400437	OpenSea	TYROBP;TYROBP	TSS1500;TSS1500	4	-0.0041876	0.00102458	4.3671e-05	-0.0041876	0.00102458	4.3671e-05	0	0	1.113	0.773938	-0.00406044	0.00335575	-0.0037468	0.00217117	-0.00732991	0.00270259	-0.00377907	0.00127008
cg16704703	chr10	3509710	OpenSea			4	0.010507	0.00257208	4.40713e-05	0.010507	0.00257208	4.40713e-05	0	0	1.65432	0.647136	0.0170772	0.0058619	0.0071471	0.00544117	0.00770842	0.00744799	0.0101563	0.00341429
cg10848272	chr14	70653719	N_Shore	SLC8A3;SLC8A3;SLC8A3;SLC8A3	5'UTR;5'UTR;5'UTR;5'UTR	4	0.00271128	0.000663971	4.43757e-05	0.00271128	0.000663971	4.43757e-05	0	0	1.55915	0.668687	0.0014199	0.00174591	0.0042914	0.00178304	0.0011497	0.00250243	0.00279251	0.0007686
cg23999170	chr1	115628111	N_Shelf	TSPAN2	Body	4	-0.00984614	0.00241976	4.7204e-05	-0.00984614	0.00241976	4.7204e-05	0	0	2.80568	0.422565	-0.000337975	0.00629189	-0.00894695	0.0065501	-0.0148735	0.00658509	-0.0112755	0.00290722
cg20533899	chr11	76381105	N_Shore	LRRC32;LRRC32	5'UTR;TSS200	4	0.00627591	0.00154616	4.92766e-05	0.00627591	0.00154616	4.92766e-05	0	0	1.88739	0.596105	0.00520731	0.00490995	0.00501504	0.00308409	0.0125768	0.00423716	0.00593393	0.00195907
cg09333580	chr20	31606541	OpenSea	BPIL1	Body	4	-0.00711141	0.00175225	4.94008e-05	-0.00711141	0.00175225	4.94008e-05	0	0	1.88773	0.596033	-0.0107607	0.004743	-0.00852303	0.00408605	-0.0104746	0.00423423	-0.00506094	0.00221659
cg02616368	chr8	143761680	OpenSea	PSCA	TSS200	4	0.00473532	0.00116707	4.96101e-05	0.00473532	0.00116707	4.96101e-05	0	0	1.52269	0.677043	0.00692085	0.00368513	0.00685783	0.00252421	0.00254402	0.00373666	0.0039904	0.00140458
cg09686317	chr1	57111122	Island	PRKAA2	1stExon	4	0.00417629	0.00103168	5.16439e-05	0.00417629	0.00103168	5.16439e-05	0	0	2.1722	0.537445	0.00167461	0.00256947	0.0067725	0.00363436	0.00768572	0.00342149	0.00411425	0.00117264
cg25963041	chr19	57049777	Island	ZFP28	TSS1500	4	0.00336219	0.000833028	5.43437e-05	0.00336219	0.000833028	5.43437e-05	0	0	1.28436	0.732851	0.00137739	0.00332189	0.0064277	0.00330039	0.0047179	0.00381127	0.00323699	0.000864637
cg26547058	chr8	142243143	OpenSea			3	0.0136312	0.00338004	5.51037e-05	0.0136312	0.00338004	5.51037e-05	0	0	0.631107	0.729385	0.0122507	0.00557163	0.012112	0.00510176	0.0184801	0.00602616
cg12269535	chr6	43142014	Island	SRF	Body	4	-0.00978421	0.00243217	5.75029e-05	-0.00978421	0.00243217	5.75029e-05	0	0	2.20255	0.531446	-0.017242	0.00611511	-0.0051077	0.0051258	-0.00983785	0.00700879	-0.00954665	0.00313955
cg06771056	chr6	32805223	N_Shore	TAP2;TAP2	Body;Body	3	-0.00711594	0.00177039	5.83403e-05	-0.00711594	0.00177039	5.83403e-05	0	0	0.067228	0.966945	-0.00777776	0.00306769	-0.00674835	0.00253089	-0.00694254	0.00326911
cg13156014	chr2	219917079	N_Shelf			4	0.0110776	0.00275848	5.92347e-05	0.0110776	0.00275848	5.92347e-05	0	0	0.202504	0.977184	0.00959398	0.00477857	0.0123545	0.00456062	0.0101468	0.0060269	0.012091	0.00619049
cg25432300	chr5	90508265	OpenSea			4	0.00896868	0.00223343	5.92798e-05	0.00896868	0.00223343	5.92798e-05	0	0	1.16731	0.760856	0.012994	0.00531219	0.00602524	0.0049519	0.0128844	0.00695651	0.0083341	0.00284085
cg07438412	chr14	105852272	S_Shore	PACS2;PACS2	Body;Body	4	0.00734186	0.001826	5.80163e-05	0.0073396	0.00183041	6.07647e-05	0.000208505	0	2.33238	0.506345	0.00875156	0.00499192	0.00244751	0.00364178	0.00975682	0.00505777	0.00883518	0.00237843
cg05612966	chr5	95583220	OpenSea			4	0.00523786	0.00131018	6.39317e-05	0.00523786	0.00131018	6.39317e-05	0	0	2.02363	0.567517	0.0026093	0.00393887	0.00829975	0.00318522	0.00817013	0.00364371	0.00447323	0.00156466
cg20860642	chrX	12883857	OpenSea	TLR7	TSS1500	2	-0.025291	0.00633493	6.54322e-05	-0.025291	0.00633493	6.54322e-05	0	0	0.921607	0.337053	-0.0196362	0.00835071			-0.0319141	0.00802026
cg11115622	chr14	65169958	N_Shore	PLEKHG3	TSS1500	4	0.00985109	0.00246944	6.62947e-05	0.00985109	0.00246944	6.62947e-05	0	0	2.64738	0.449243	0.00181651	0.00579414	0.0125017	0.00507726	0.0166565	0.00792795	0.0104368	0.00323449
cg00860090	chr1	226832000	S_Shelf	ITPKB	Body	4	0.00416	0.0010467	7.05591e-05	0.00416	0.0010467	7.05591e-05	0	0	0.957914	0.811434	0.00121579	0.00340154	0.00494719	0.00210093	0.00333721	0.00264513	0.00448738	0.0013382
cg21555177	chr6	33173024	S_Shore	HSD17B8	Body	4	-0.00540855	0.00136114	7.08134e-05	-0.00540855	0.00136114	7.08134e-05	0	0	1.19109	0.755142	-0.00583577	0.0038671	-0.00522968	0.00281031	-0.00159444	0.00334779	-0.00622646	0.00177348
cg27262041	chr11	19654032	OpenSea	NAV2	Body	4	0.0145767	0.00333144	1.21154e-05	0.0146022	0.00367661	7.13756e-05	0.00283272	0	2.89356	0.408329	0.0126458	0.00790888	0.0226131	0.00574696	0.0122009	0.0089252	0.0096786	0.00497972
cg03048488	chr1	15733844	N_Shelf			4	-0.0055579	0.00140005	7.1936e-05	-0.0055579	0.00140005	7.1936e-05	0	0	0.493434	0.920332	-0.00430248	0.00400811	-0.00593147	0.0031783	-0.00917729	0.0050389	-0.00531925	0.00166694
cg12011479	chr19	51873045	S_Shore	CLDND2	TSS1500	4	-0.00507238	0.00127834	7.24922e-05	-0.00507238	0.00127834	7.24922e-05	0	0	2.48385	0.478217	-0.00256507	0.0029032	-0.00851072	0.00267158	-0.00336082	0.00374131	-0.00473528	0.00170472
cg05703659	chr7	158494734	N_Shelf	NCAPG2	5'UTR	4	0.00547249	0.00137985	7.30885e-05	0.00547249	0.00137985	7.30885e-05	0	0	1.22738	0.746446	0.00944088	0.00398072	0.00440215	0.00378552	0.0073664	0.00517724	0.00492318	0.00156527
cg13962372	chr1	22415149	OpenSea	CDC42;CDC42;CDC42	Body;Body;Body	4	-0.00893663	0.00225998	7.67612e-05	-0.00893663	0.00225998	7.67612e-05	0	0	2.53222	0.469497	-0.000430312	0.0057855	-0.00993164	0.00492494	-0.00765747	0.00636686	-0.0109015	0.00287759
cg25735305	chr11	124629580	Island	ESAM	Body	4	0.00240252	0.000607629	7.68808e-05	0.00240252	0.000607629	7.68808e-05	0	0	1.67875	0.641669	0.00327654	0.00268964	0.00182161	0.00259373	0.00708257	0.00331468	0.00226825	0.00061975
cg06099303	chr1	96672496	OpenSea			4	0.00751095	0.00189292	7.25017e-05	0.00751705	0.0019022	7.75785e-05	0.000294945	0.224974	3.87084	0.275753	0.0176873	0.00548709	0.00641373	0.00403486	0.00324134	0.00532575	0.00669141	0.00236418
cg19653946	chr6	32862620	Island			4	-0.00141714	0.000359332	8.01906e-05	-0.00141714	0.000359332	8.01906e-05	0	0	2.58361	0.46037	0.000745631	0.00152823	-0.00130169	0.000804816	-0.000652342	0.00118731	-0.00167956	0.000413032
cg17810656	chr8	94847101	OpenSea			2	-0.00930287	0.00236608	8.43237e-05	-0.00930287	0.00236608	8.43237e-05	0	0	0.147283	0.701145	-0.00876255	0.00265138			-0.0108819	0.00403706
cg03513388	chr1	17599362	OpenSea	PADI3	Body	4	0.00571471	0.00145355	8.4403e-05	0.00571471	0.00145355	8.4403e-05	0	0	1.55346	0.669989	0.00466252	0.00516909	0.00509739	0.00358311	-0.000808118	0.00498843	0.00657523	0.00165154
cg01011757	chr2	233416425	S_Shore	TIGD1;EIF4E2	TSS1500;Body	4	-0.00424845	0.00108062	8.44172e-05	-0.00424845	0.00108062	8.44172e-05	0	0	1.12758	0.77042	-0.00373472	0.00366619	-0.000960355	0.00351136	-0.00665196	0.00445506	-0.00452978	0.00116411
cg20503109	chr17	74565795	OpenSea	ST6GALNAC2	Body	4	0.00403469	0.00102685	8.52302e-05	0.00403469	0.00102685	8.52302e-05	0	0	1.07621	0.782821	0.00271749	0.00247902	0.00295219	0.00215961	0.00648694	0.00318681	0.00453733	0.00132695
cg13452961	chr9	129468985	S_Shore			4	0.00718241	0.00182841	8.55738e-05	0.00718241	0.00182841	8.55738e-05	0	0	1.37462	0.711494	0.00400585	0.00450801	0.00995063	0.00345842	0.00903071	0.00440345	0.00614117	0.00260172
cg09747445	chr15	70387268	N_Shore	TLE3;TLE3;TLE3	Body;Body;Body	4	-0.00964334	0.00245522	8.57645e-05	-0.00964334	0.00245522	8.57645e-05	0	0	2.7537	0.431179	-0.0076639	0.00590087	-0.0171371	0.00515005	-0.00503682	0.00652465	-0.00795071	0.00326546
cg05254511	chr22	39077689	N_Shore	TOMM22	TSS1500	4	-0.00352389	0.000898614	8.80085e-05	-0.00352389	0.000898614	8.80085e-05	0	0	1.44015	0.696152	-0.00273455	0.00319145	-0.00180028	0.00193766	-0.00260395	0.0024211	-0.00432931	0.00109131
cg22579114	chr7	100916357	OpenSea			4	0.00712305	0.00181767	8.89991e-05	0.00712305	0.00181767	8.89991e-05	0	0	1.90387	0.592596	0.00034767	0.00512337	0.00861649	0.00367271	0.00753254	0.00545851	0.00790047	0.00230803
cg07852231	chr2	71116638	S_Shore			3	0.00585802	0.00149784	9.19206e-05	0.00585802	0.00149784	9.19206e-05	0	0	0.588552	0.745071	0.00668088	0.00290067	0.0047721	0.00205149	0.00735896	0.00264581
cg13526007	chr14	42076710	S_Shore	LRFN5	TSS200	4	0.00531917	0.0013603	9.21875e-05	0.00531917	0.0013603	9.21875e-05	0	0	1.71437	0.633743	0.0110552	0.00468197	0.00431947	0.00270805	0.00658066	0.00380414	0.00478577	0.00169862
cg08407553	chrX	70587800	S_Shore	TAF1;BCYRN1;TAF1	Body;Body;Body	2	-0.0133299	0.00332228	6.0141e-05	-0.013356	0.00341829	9.33619e-05	0.00112692	0.0533583	1.05637	0.304045	-0.0103529	0.0042561			-0.0172929	0.00435886
cg17114866	chr19	35222640	N_Shelf			3	0.00857152	0.00219762	9.60472e-05	0.00857152	0.00219762	9.60472e-05	0	0	0.266228	0.875365	0.00920185	0.0047349			0.00499556	0.00623178	0.00890008	0.00249412
cg00541544	chr22	39150255	N_Shore	UNC84B	5'UTR	4	-0.00453083	0.00116294	9.77951e-05	-0.00453083	0.00116294	9.77951e-05	0	0	0.422482	0.93556	-0.00498043	0.00374766	-0.00464444	0.00231472	-0.006524	0.00308559	-0.00400926	0.00147995
cg02734521	chr6	108326291	OpenSea			2	-0.0148402	0.00381069	9.84594e-05	-0.0148402	0.00381069	9.84594e-05	0	0	0.480341	0.488268	-0.0130548	0.00443868			-0.0188188	0.00588848
cg05334655	chr14	23890294	S_Shore	MYH7	Body	4	0.00493766	0.00126803	9.86143e-05	0.00493766	0.00126803	9.86143e-05	0	0	1.0909	0.779271	0.00753371	0.00369452	0.00611579	0.00287514	0.00221672	0.00365173	0.00453454	0.00154446
cg17389988	chr7	40740924	OpenSea	C7orf10	Body	4	0.00814859	0.00209527	0.000100639	0.00814859	0.00209527	0.000100639	0	0	1.46044	0.691431	0.00702206	0.00594938	0.00341348	0.0046608	0.00822787	0.00569389	0.00997134	0.00260373
cg08263071	chr6	94126643	Island	EPHA7	Body	4	0.00489618	0.00125943	0.00010123	0.00489618	0.00125943	0.00010123	0	0	1.06859	0.784661	0.0064188	0.00434374	0.00539356	0.0024979	0.000697529	0.00376969	0.00510134	0.00155868
cg17607231	chr2	231090329	OpenSea	SP140;SP140	TSS200;TSS200	4	0.00930716	0.00239476	0.000101712	0.00930716	0.00239476	0.000101712	0	0	0.965641	0.809565	0.0056284	0.00624568	0.0119736	0.00504783	0.013338	0.00641963	0.00847265	0.0031006
cg16468417	chr3	35835606	OpenSea	ARPP-21	3'UTR	4	0.00480935	0.0012384	0.000102958	0.00480935	0.0012384	0.000102958	0	0	0.428686	0.934255	0.00685758	0.00407034	0.00599511	0.00393096	0.00306235	0.00575832	0.0045389	0.00133444
cg00097146	chr2	45171818	Island	SIX3	Body	4	0.00503751	0.00129773	0.000103686	0.00503751	0.00129773	0.000103686	0	0	0.161758	0.983513	0.00402998	0.00359175	0.00463165	0.00261846	0.00589276	0.00389532	0.00533654	0.00165534
cg19341652	chr6	116600143	N_Shore	DSE;TSPYL1	TSS1500;1stExon	4	-0.0157729	0.00406413	0.000104023	-0.0157729	0.00406413	0.000104023	0	0	1.68294	0.640733	-0.020412	0.00896098	-0.023217	0.0091251	-0.0186121	0.0121519	-0.0108868	0.00530676
cg06556290	chr7	92222188	S_Shelf			4	0.0111515	0.00287656	0.000105885	0.0111515	0.00287656	0.000105885	0	0	1.28975	0.731569	0.00812247	0.00647905	0.00867467	0.00624314	0.00603153	0.00771166	0.0143608	0.00384928
cg06517984	chr8	143407646	Island	TSNARE1	Body	3	0.00912986	0.00235763	0.000107741	0.00912986	0.00235763	0.000107741	0	0	1.33688	0.512507	0.0113199	0.00400055			0.0148832	0.00658207	0.00701423	0.00295329
cg00004089	chr17	74678836	OpenSea	MXRA7;MXRA7;MXRA7	Body;3'UTR;Body	4	-0.00394117	0.00101916	0.000110146	-0.00394117	0.00101916	0.000110146	0	0	0.642389	0.886663	-0.00624432	0.00360222	-0.005181	0.00326245	-0.00315349	0.00340891	-0.00361071	0.0011114
cg03172931	chr19	8677774	S_Shelf			4	-0.00669832	0.0017341	0.000112136	-0.00669832	0.0017341	0.000112136	0	0	2.17556	0.536778	-0.0109831	0.00409127	-0.00267433	0.003702	-0.00686766	0.00542728	-0.00686739	0.00224064
cg05952498	chr6	31545257	N_Shelf	TNF	Body	3	0.0113622	0.00294396	0.000113619	0.0113622	0.00294396	0.000113619	0	0	0.0405942	0.979907	0.0106352	0.00483099	0.011602	0.00417621	0.0122067	0.0060766
cg10621597	chr4	140481801	S_Shelf			3	0.00722809	0.00187458	0.000115331	0.00722809	0.00187458	0.000115331	0	0	0.477072	0.78778	0.00681821	0.00341306	0.00658363	0.00247708	0.0101048	0.00395772
cg04072910	chr3	129290078	OpenSea	PLXND1	Body	3	0.00678656	0.00176039	0.000115666	0.00678656	0.00176039	0.000115666	0	0	1.49565	0.473396	0.00690823	0.00286763	0.00542855	0.00239062	0.0121832	0.00428703
cg08587504	chr20	34639686	S_Shore	LOC647979	TSS1500	4	0.00533813	0.00138545	0.000116688	0.00533813	0.00138545	0.000116688	0	0	1.81788	0.611053	0.00316097	0.00345251	0.00568972	0.00300468	-0.000338952	0.00468318	0.00644772	0.00173564
cg05439665	chr13	113656424	S_Shore	MCF2L;MCF2L	Body;Body	4	-0.0114286	0.00296708	0.000117248	-0.0114286	0.00296708	0.000117248	0	0	2.49044	0.477021	-0.0187344	0.00745902	-0.00389675	0.00603383	-0.0114469	0.0098221	-0.0125675	0.00381108
cg22454011	chr18	13611439	OpenSea	C18orf1;C18orf1;C18orf1;C18orf1	TSS1500;Body;Body;TSS1500	4	-0.0110837	0.00288033	0.000119052	-0.0110837	0.00288033	0.000119052	0	0	0.188278	0.979459	-0.0115384	0.00722059	-0.0106007	0.00651776	-0.00809614	0.00688937	-0.011778	0.00376053
cg15554214	chr19	43690996	OpenSea	PSG5;PSG5	TSS1500;TSS1500	2	-0.0124995	0.00325245	0.000121489	-0.0124995	0.00325245	0.000121489	0	0	0.0145579	0.903963	-0.0128286	0.00420046			-0.0120773	0.00422239
cg23782083	chr8	37997055	OpenSea	ASH2L;ASH2L	3'UTR;3'UTR	4	0.0105611	0.00275008	0.000122887	0.0105611	0.00275008	0.000122887	0	0	1.93497	0.586013	0.00943574	0.00617351	0.0105605	0.00546317	-2.76411e-06	0.00749978	0.0133107	0.00382337
cg22051763	chr12	101673672	N_Shore	UTP20	TSS1500	4	-0.00239479	0.000624047	0.000124288	-0.00239479	0.000624047	0.000124288	0	0	0.596445	0.897246	-0.00400116	0.00219694	-0.00256572	0.00167948	-0.00200612	0.00192426	-0.00222211	0.000704536
cg17025835	chr7	123673331	Island	TMEM229A;TMEM229A	1stExon;5'UTR	4	0.00269335	0.000702154	0.000125134	0.00269335	0.000702154	0.000125134	0	0	0.849742	0.837536	0.00529796	0.00362554	0.00222161	0.00248422	0.000265669	0.00357533	0.00272253	0.000722411
cg17892556	chr19	12267464	Island	ZNF625;ZNF625	1stExon;5'UTR	4	0.00457371	0.00119279	0.00012584	0.00457371	0.00119279	0.00012584	0	0	0.442438	0.931343	0.00597942	0.0035039	0.0055054	0.00262887	0.00338719	0.00266883	0.00430452	0.0015402
cg18302606	chr19	39904402	Island	PLEKHG2	5'UTR	4	-0.00834139	0.00217562	0.000126061	-0.00834139	0.00217562	0.000126061	0	0	2.23824	0.524456	-0.0162861	0.00579519	-0.00564405	0.00485314	-0.0101085	0.00785037	-0.00727395	0.00264043
cg08629043	chr2	240196078	N_Shore	HDAC4	Body	4	0.00682591	0.00178396	0.000130102	0.00682591	0.00178396	0.000130102	0	0	1.74164	0.627717	0.00654566	0.00414942	0.00354268	0.00366985	0.00452876	0.00440219	0.00912218	0.00246135
cg06066711	chr1	6662645	Island	KLHL21	1stExon	4	0.00211849	0.000553673	0.000130107	0.00211849	0.000553673	0.000130107	0	0	1.26996	0.736278	0.00317103	0.00143933	0.00259864	0.000988429	0.00125698	0.0013257	0.00171573	0.00080505
cg06120000	chr16	67480229	OpenSea	ATP6V0D1	Body	4	-0.00413694	0.00108235	0.000132281	-0.00413694	0.00108235	0.000132281	0	0	2.29406	0.51366	-0.00361885	0.00373686	-0.00654607	0.00320653	-0.00985357	0.0040983	-0.00343356	0.00118408
cg26963146	chr8	141572044	OpenSea	EIF2C2;EIF2C2	Body;Body	4	0.00724697	0.00189695	0.000133273	0.00724697	0.00189695	0.000133273	0	0	1.29664	0.72993	0.00237841	0.00473902	0.00687034	0.00409247	0.00878544	0.00464352	0.00848715	0.00250985
cg24504927	chr12	85667353	OpenSea			4	0.00119983	0.000314909	0.000138912	0.00119983	0.000314909	0.000138912	0	0	1.00833	0.799236	0.00319742	0.00231432	0.00221254	0.00187894	0.00109542	0.00188096	0.00114119	0.000310641
cg17298279	chr6	158982078	S_Shore	TMEM181	Body	4	-0.00392402	0.00102993	0.000138975	-0.00392402	0.00102993	0.000138975	0	0.0294938	3.09117	0.377781	-0.00864132	0.00284476	-0.00312556	0.00206089	-0.00456714	0.00312469	-0.00310928	0.00131698
cg26182406	chr14	105491309	S_Shelf			4	0.00859734	0.00225803	0.000140408	0.00859734	0.00225803	0.000140408	0	0	1.03966	0.791658	0.0143833	0.00626881	0.00651456	0.00527856	0.00991621	0.00654819	0.00791327	0.00274777
cg16587616	chr6	62996022	Island	KHDRBS2;KHDRBS2	1stExon;5'UTR	4	0.00694671	0.00182504	0.000141039	0.00694671	0.00182504	0.000141039	0	0	2.72211	0.436483	0.00483583	0.00448695	0.012892	0.00416101	0.00248512	0.00560355	0.0062601	0.00228306
cg19516825	chr19	48686777	S_Shore			4	0.00802489	0.00210853	0.000141278	0.00802489	0.00210853	0.000141278	0	0	0.537225	0.91064	0.00393611	0.00583295	0.00896892	0.00494713	0.00852196	0.00760024	0.00854901	0.00250271
cg01003666	chr7	139929429	N_Shore			4	0.00983551	0.00247462	7.0512e-05	0.00977674	0.00256934	0.000141714	0.00130067	0	2.55174	0.466013	0.0117861	0.00558449	0.0111309	0.00421963	-0.000198655	0.00579422	0.0115263	0.0039895
cg08241368	chr19	45716313	OpenSea	EXOC3L2	3'UTR	3	0.00696125	0.00182957	0.000141886	0.00696125	0.00182957	0.000141886	0	0	0.517128	0.77216	0.00737695	0.00297098	0.00807685	0.00291003	0.00480582	0.00306058
cg17058475	chr11	68607737	N_Shore	CPT1A;CPT1A	5'UTR;5'UTR	4	-0.00525528	0.00138205	0.000143225	-0.00525528	0.00138205	0.000143225	0	0	1.07303	0.783588	-0.00584932	0.00355361	-0.00686373	0.00252323	-0.00666453	0.00369648	-0.00372694	0.00193089
cg13675015	chr6	43217925	S_Shelf	TTBK1	Body	4	0.00617604	0.00162558	0.000145117	0.00617604	0.00162558	0.000145117	0	0	0.480089	0.923243	0.00716261	0.00422228	0.0043164	0.00378408	0.00873755	0.00503663	0.00620854	0.00199104
cg01899437	chr4	24914441	OpenSea	CCDC149;CCDC149	1stExon;5'UTR	4	0.00116809	0.000307581	0.000146059	0.00116809	0.000307581	0.000146059	0	0	1.05047	0.789043	-0.000115528	0.00249707	0.00111028	0.00224478	-0.00122715	0.00233324	0.00122574	0.000300223
cg01596292	chr8	101315505	OpenSea	RNF19A;RNF19A	5'UTR;TSS200	3	0.0109178	0.0027336	6.49855e-05	0.0108906	0.00287093	0.000148593	0.00137581	0.23402	2.61103	0.271032	0.016506	0.00515022			0.00290451	0.00557281	0.0108851	0.00348942
cg12883767	chr12	58013109	N_Shore	SLC26A10	TSS1500	4	0.00744101	0.00196276	0.000149983	0.00744101	0.00196276	0.000149983	0	0	1.03949	0.791697	0.0046212	0.00561563	0.010447	0.00436275	0.00420705	0.00475303	0.00774264	0.00249135
cg13782937	chr10	116418181	OpenSea	ABLIM1;ABLIM1;ABLIM1	Body;TSS200;Body	4	0.00585009	0.0015436	0.000150706	0.00585009	0.0015436	0.000150706	0	0	1.08423	0.780882	0.00703115	0.00468509	0.00910728	0.00433738	0.00841497	0.00498789	0.00489211	0.00175277
cg26695387	chr17	21189768	S_Shore	MAP2K3	Body	4	0.00412417	0.00108826	0.000150839	0.00412417	0.00108826	0.000150839	0	0	0.451559	0.929397	0.00534765	0.00315631	0.00470668	0.00225995	0.0049774	0.0029221	0.00352191	0.00138357
cg03388786	chr8	56852253	OpenSea	LYN;LYN	5'UTR;5'UTR	4	0.00519654	0.00130515	6.84628e-05	0.00523005	0.0013809	0.000152226	0.000820001	0	2.92326	0.403609	0.00399915	0.0032088	0.00338157	0.00230876	0.0107447	0.00323856	0.00542456	0.00192722
cg26618645	chr16	30780332	OpenSea	RNF40	Body	4	-0.00240623	0.000635487	0.000152824	-0.00240623	0.000635487	0.000152824	0	0	1.92471	0.588179	-0.00341638	0.00216511	-0.00142697	0.00197356	8.90558e-05	0.00188018	-0.00270186	0.000706978
cg01565028	chr19	48898052	S_Shore	GRIN2D	TSS200	4	0.000997207	0.000263665	0.000155513	0.000997207	0.000263665	0.000155513	0	0	1.85714	0.60258	0.000424547	0.00169146	-0.00101113	0.00154657	0.000679066	0.00163826	0.00108281	0.00026076
cg20416574	chr2	48080399	OpenSea	FBXO11;FBXO11;FBXO11	5'UTR;5'UTR;5'UTR	2	-0.0129157	0.00341664	0.000156675	-0.0129157	0.00341664	0.000156675	0	0	0.166699	0.683062	-0.0119845	0.00395552			-0.0150711	0.00535341
cg02743674	chr11	2433468	N_Shore	TRPM5	Body	4	0.00532898	0.0014103	0.000157696	0.00532898	0.0014103	0.000157696	0	0	1.30532	0.72787	0.00373281	0.00391574	0.00743381	0.00278889	0.00195334	0.00371879	0.0054295	0.00185482
cg06911110	chr1	17293971	S_Shore	CROCC	Body	3	-0.0137012	0.00362883	0.000159591	-0.0137012	0.00362883	0.000159591	0	0	1.06087	0.588348	-0.0181645	0.00559934	-0.0115949	0.00552109	-0.00902216	0.00714883
cg20485733	chr17	2798136	OpenSea	RAP1GAP2;RAP1GAP2	Body;Body	4	0.0167867	0.00444671	0.000159948	0.0167867	0.00444671	0.000159948	0	0	1.13595	0.768403	-0.000586585	0.0171098	0.0194481	0.0167856	0.0170108	0.00473307	0.0204646	0.00909594
cg05119988	chr4	166251189	S_Shelf	SC4MOL;SC4MOL	5'UTR;5'UTR	4	-0.0110215	0.00292075	0.000160965	-0.0110215	0.00292075	0.000160965	0	0	1.87634	0.598464	-0.0130396	0.00755377	-0.00381501	0.00666589	-0.00550172	0.00916396	-0.013392	0.0035966
cg24403268	chr18	14178949	Island			4	0.0165321	0.00438135	0.000161109	0.0165321	0.00438135	0.000161109	0	0	0.704918	0.872046	0.0132942	0.0109126	0.011985	0.0110864	0.0277016	0.0145712	0.0173102	0.00525774
cg00716716	chr17	38021651	S_Shore	IKZF3;IKZF3;IKZF3;IKZF3;IKZF3;IKZF3	TSS1500;TSS1500;TSS1500;TSS1500;TSS1500;TSS1500	4	-0.00499302	0.00132444	0.000163298	-0.00499302	0.00132444	0.000163298	0	0	0.890507	0.827718	-0.00258524	0.00394359	-0.00431568	0.00264277	-0.00373784	0.00316631	-0.00606962	0.00174645
cg02130091	chr16	29212929	OpenSea			4	0.0059642	0.00158465	0.000167395	0.0059642	0.00158465	0.000167395	0	0	1.0145	0.797744	0.00387611	0.00425168	0.00590869	0.00352724	0.0104939	0.00445508	0.00576069	0.00198122
cg15772366	chr6	111926749	OpenSea	TRAF3IP2;TRAF3IP2;TRAF3IP2	Body;5'UTR;5'UTR	4	0.00662012	0.00176028	0.000169355	0.00662012	0.00176028	0.000169355	0	0	2.36886	0.499458	0.0108043	0.00356921	0.00415333	0.00280533	0.00863153	0.00388106	0.00535003	0.0034207
cg03699307	chr16	75600014	Island	GABARAPL2	TSS1500	4	-0.00103641	0.000275823	0.000171608	-0.00103641	0.000275823	0.000171608	0	0	1.62473	0.653796	4.52973e-05	0.000996711	-0.000738829	0.000863716	-0.00194743	0.00139014	-0.00113131	0.000293961
cg16315992	chr17	62498297	N_Shelf	DDX5	Body	4	-0.00718317	0.00191186	0.000171854	-0.00718317	0.00191186	0.000171854	0	0	1.66662	0.644381	-0.0131972	0.00751441	-0.000447886	0.00690742	-0.0108691	0.00807514	-0.00712194	0.00200867
cg01973676	chr7	101596404	OpenSea	CUX1;CUX1;CUX1	Body;Body;Body	4	0.0102335	0.00225228	5.52974e-06	0.0109048	0.00290642	0.000175448	0.00305749	0	2.65582	0.447787	0.0136839	0.00661883	0.0162442	0.00473431	0.00910086	0.00673336	0.00759399	0.00279468
cg10202994	chr2	220071050	N_Shore	ZFAND2B	TSS1500	3	-0.00408691	0.00108955	0.000176125	-0.00408691	0.00108955	0.000176125	0	0	1.32104	0.516582	-0.00637984	0.00279272	-0.00431659	0.00140402	-0.00242041	0.00177789
cg07749597	chr5	42840698	OpenSea			3	-0.0158949	0.00424331	0.000179771	-0.0158949	0.00424331	0.000179771	0	0	0.590824	0.744225	-0.0162015	0.00707289	-0.0135087	0.00583738	-0.0230446	0.00930055
cg26403559	chr17	17494874	Island	PEMT	1stExon	4	-0.00143283	0.000382633	0.000180629	-0.00143283	0.000382633	0.000180629	0	0	2.06654	0.558711	-0.00116609	0.00101916	-0.000613699	0.000806086	-0.00267993	0.00114082	-0.00161619	0.000484327
cg17192954	chr18	1296921	OpenSea	C18orf2;C18orf2;C18orf2;C18orf2	Body;Body;Body;Body	4	0.0060077	0.0016051	0.000181925	0.0060077	0.0016051	0.000181925	0	0	0.318709	0.956472	0.00637652	0.00413698	0.00608435	0.00351466	0.00882694	0.00485017	0.00553493	0.00201516
cg24445316	chr1	23889092	S_Shelf			3	-0.00970364	0.00248167	9.22488e-05	-0.00967741	0.00258584	0.000182227	0.00120795	0.14001	2.32561	0.312608	-0.00360521	0.00471566	-0.0108127	0.00352648	-0.013686	0.00415471
cg22653878	chr6	40698276	OpenSea			4	0.00605657	0.00162224	0.000188862	0.00605657	0.00162224	0.000188862	0	0	1.43913	0.696389	0.00811624	0.00439548	0.00930095	0.00372029	0.00632586	0.0043149	0.00458119	0.00202328
cg00975624	chr3	159646501	OpenSea			4	0.00560127	0.00150399	0.000195888	0.00560127	0.00150399	0.000195888	0	0	2.01172	0.569977	0.00473779	0.00357376	0.00354487	0.00266764	0.0107742	0.0038591	0.00611006	0.00222491
cg11399409	chr1	155211462	OpenSea	GBA;GBA;GBA;GBA;GBA	5'UTR;TSS1500;5'UTR;5'UTR;5'UTR	2	0.0122629	0.00329346	0.000196554	0.0122629	0.00329346	0.000196554	0	0	0.111528	0.738411	0.0112287	0.00441319			0.0133907	0.00409308
cg24708332	chr2	102794246	OpenSea	IL1R1	3'UTR	4	0.00450946	0.00109377	3.74184e-05	0.00444394	0.00119551	0.000201446	0.000668938	0.149035	3.52541	0.317482	-0.000695357	0.0035789	0.0071442	0.00276908	0.000534564	0.00439492	0.00486974	0.0012325
cg12482092	chr17	78456490	S_Shelf			4	0.00724231	0.00194842	0.000201582	0.00724231	0.00194842	0.000201582	0	0	0.0856779	0.993499	0.00609109	0.00510123	0.007729	0.00445165	0.0082914	0.00583998	0.00725731	0.00240607
cg00176675	chr8	141572142	OpenSea	EIF2C2;EIF2C2	Body;Body	4	0.0101538	0.00273315	0.000203159	0.0101538	0.00273315	0.000203159	0	0	2.02382	0.567477	0.0167516	0.00782732	0.00201073	0.00696123	0.0108423	0.00961858	0.010825	0.00316682
cg17749454	chr17	73101934	N_Shelf	SLC16A5	Body	4	-0.00396557	0.00106746	0.000203233	-0.00396557	0.00106746	0.000203233	0	0	1.07528	0.783045	-0.000406539	0.00362546	-0.00324391	0.00344637	-0.00480367	0.00440416	-0.0043524	0.00115063
cg17900854	chr21	40984777	OpenSea	C21orf88;C21orf88	TSS200;TSS200	4	0.0014762	0.00037224	7.31777e-05	0.00147099	0.000396016	0.000203623	0.000148584	0	2.08734	0.554479	0.00169665	0.0019997	0.0024276	0.00202425	-0.00199738	0.00218335	0.00152264	0.000371472
cg17130481	chr20	853509	OpenSea	ANGPT4	3'UTR	4	0.00491596	0.00132433	0.000205594	0.00491596	0.00132433	0.000205594	0	0	0.319817	0.956259	0.00653968	0.00367324	0.00404943	0.0029157	0.00599018	0.00444767	0.00479085	0.001612
cg06797069	chr17	37328334	N_Shelf			4	0.00494146	0.00133123	0.000205675	0.00494146	0.00133123	0.000205675	0	0	0.457262	0.928175	0.00692547	0.00358049	0.00513264	0.00298981	0.00601406	0.00435163	0.00437047	0.00162521
cg19613194	chr13	35516223	OpenSea	NBEA	TSS1500	4	0.00391904	0.00105639	0.000207385	0.00391904	0.00105639	0.000207385	0	0	0.803947	0.848523	0.00640762	0.00295344	0.00339951	0.0020727	0.00427501	0.00283182	0.00355699	0.00138776
cg12743248	chr8	49636840	OpenSea	EFCAB1;EFCAB1;EFCAB1	3'UTR;3'UTR;Body	4	0.00751844	0.00202803	0.000209516	0.00751844	0.00202803	0.000209516	0	0	0.96992	0.80853	0.0115544	0.00548715	0.00830076	0.00563992	0.00218057	0.00700368	0.00714875	0.00233626
cg05206884	chr22	33454324	Island	SYN3;SYN3	5'UTR;1stExon	4	0.00209709	0.000565855	0.000210512	0.00209709	0.000565855	0.000210512	0	0	1.34533	0.718398	0.00117001	0.00206544	-0.000267364	0.00241646	0.00138172	0.00262328	0.00236258	0.000588003
cg11793783	chr5	176103447	N_Shelf			4	0.00599248	0.00161746	0.000211491	0.00599248	0.00161746	0.000211491	0	0	1.2665	0.737104	0.00872093	0.0054808	0.00268786	0.00351211	0.00529951	0.00462338	0.00685477	0.00195341
cg16116203	chr12	6876922	Island	PTMS	Body	4	-0.00812368	0.00218062	0.000195008	-0.00811048	0.00219116	0.000214363	0.000360793	0	2.79072	0.425029	-0.00463026	0.00495962	-0.00895237	0.00438293	0.00259139	0.00705519	-0.0104012	0.0029128
cg10457446	chr17	4401043	N_Shore	SPNS2	TSS1500	3	0.00712267	0.00192475	0.000215118	0.00712267	0.00192475	0.000215118	0	0	1.39956	0.496695	0.0103423	0.0033814	0.00485063	0.00301478	0.00685173	0.00300098
cg17061244	chr12	81331469	Island	LIN7A	1stExon	4	0.00436744	0.0011803	0.000215374	0.00436744	0.0011803	0.000215374	0	0	1.48234	0.686352	0.0053834	0.00386308	0.00692945	0.00252704	0.00268489	0.0036266	0.00360031	0.00142494
cg11993160	chr18	12404041	N_Shelf			4	0.00672733	0.00182015	0.000218999	0.00672733	0.00182015	0.000218999	0	0	2.27877	0.5166	0.000434922	0.00479149	0.00790015	0.00374538	0.00486668	0.00425628	0.00843747	0.00244964
cg21776599	chr1	1830693	OpenSea			4	-0.00600353	0.00162514	0.000220613	-0.00600353	0.00162514	0.000220613	0	0	2.67653	0.44423	-0.0115457	0.00452613	-0.00469506	0.00371173	-0.00884296	0.00334861	-0.00419344	0.00214826
cg09912350	chr4	156588326	Island	GUCY1A3;GUCY1A3;GUCY1A3;GUCY1A3;GUCY1A3;GUCY1A3;GUCY1A3;GUCY1A3;GUCY1A3	5'UTR;5'UTR;5'UTR;5'UTR;1stExon;5'UTR;5'UTR;1stExon;TSS1500	4	0.00270712	0.00073282	0.000220651	0.00270712	0.00073282	0.000220651	0	0	1.75912	0.623871	0.00417696	0.00208639	0.000609101	0.00188565	0.00340942	0.00211067	0.00283528	0.000867024
cg18464823	chr15	34629056	N_Shore	SLC12A6;SLC12A6;SLC12A6;SLC12A6;SLC12A6	TSS200;5'UTR;TSS200;5'UTR;5'UTR	4	-0.00764285	0.0020696	0.000221705	-0.00764285	0.0020696	0.000221705	0	0	0.085076	0.993566	-0.00757183	0.00599571	-0.00791906	0.00433472	-0.00932209	0.00572251	-0.00721753	0.0026096
cg06532071	chr12	132674849	Island			4	-0.00454734	0.00123323	0.000226597	-0.00454734	0.00123323	0.000226597	0	0	0.730209	0.866077	-0.00695143	0.00375343	-0.00541408	0.0027501	-0.00287732	0.00352049	-0.00409627	0.00150047
cg06957169	chr1	156571551	OpenSea	GPATCH4;GPATCH4	TSS1500;TSS1500	4	-0.00152208	0.000372851	4.45956e-05	-0.00150494	0.000408148	0.000226703	0.000237481	0.0564939	3.17963	0.36475	-0.00108409	0.00140541	-0.00232605	0.000898853	0.000486791	0.00114509	-0.00159085	0.000428114
cg10950593	chr7	6212775	S_Shelf	CYTH3	Body	4	0.0069829	0.00189382	0.000226742	0.0069829	0.00189382	0.000226742	0	0	1.58164	0.66356	0.0059469	0.00579189	0.0047046	0.00404281	0.015683	0.0067469	0.00715249	0.00227529
cg22070855	chr3	172167527	Island	GHSR;GHSR	TSS1500;TSS1500	4	0.00482831	0.00130961	0.000227058	0.00482831	0.00130961	0.000227058	0	0	1.73707	0.628724	0.00483541	0.00400322	0.00772227	0.00258059	0.00473704	0.00348893	0.00356559	0.00168796
cg03934689	chr8	22456092	Island	C8orf58	TSS1500	3	-0.00419317	0.00113761	0.000227846	-0.00419317	0.00113761	0.000227846	0	0	0.00373359	0.998135	-0.00409824	0.00198511	-0.00420104	0.00153232	-0.00432871	0.00243383
cg18000306	chr6	288505	N_Shelf			4	0.00815274	0.00221373	0.000230687	0.00815274	0.00221373	0.000230687	0	0	1.43669	0.696957	0.00370562	0.00482087	0.00924229	0.00424106	0.0135111	0.00615329	0.00839902	0.00316743
cg00799387	chr3	32827142	S_Shelf			2	0.0186808	0.00507362	0.000231458	0.0186808	0.00507362	0.000231458	0	0	0.139531	0.708747	0.0171243	0.00639997			0.0209139	0.00680031
cg25526061	chr10	135088451	N_Shore	ADAM8;ADAM8;ADAM8	Body;Body;Body	4	-0.00248494	0.00067505	0.000232215	-0.00248494	0.00067505	0.000232215	0	0	1.56169	0.668107	-0.00240934	0.00195997	-0.00183737	0.00152025	1.38582e-05	0.00212049	-0.00297952	0.000815026
cg22594416	chr22	50178099	Island	BRD1	Body	4	0.00842799	0.00228954	0.000232239	0.00842799	0.00228954	0.000232239	0	0	0.560502	0.905412	0.00567909	0.00570776	0.00793215	0.00506588	0.0132053	0.00731631	0.00877126	0.00286705
cg14372937	chrX	31090318	Island	FTHL17	TSS200	2	-0.0112339	0.00305325	0.000233834	-0.0112339	0.00305325	0.000233834	0	0	0.689516	0.406329	-0.0090568	0.00388394			-0.0142297	0.00404432
cg24661236	chr6	36930062	Island	PI16	Body	4	0.0221274	0.00601663	0.000235335	0.0221274	0.00601663	0.000235335	0	0	2.16663	0.538551	0.0104765	0.014915	0.0206355	0.0139323	0.0437752	0.0149363	0.021274	0.00775172

## Sheet: Table S2
ProbeID	Chromosome	Position	Relation to Island	UCSC Reference Gene Name	UCSC Referenc Gene Group	Number of Cohorts	All_Effect_Fixed	All_Effect_SE_Fixed	All_P_Fixed	All_Effect_Random	All_Effect_SE_Random	All_P_Random	All_tau	All_I2	All_Q	All_Het.P	beta_UCL	SE_UCL	beta_Aberdeen	SE_Aberdeen	beta_IoPPN	SE_IoPPN	beta_TOP	SE_TOP
cg11269166	chr2	172203847	OpenSea	METTL8	Body	4	0.00901506	0.00134886	2.33368e-11	0.00973576	0.00187311	2.01837e-07	0.00223428	0.359649	4.68493	0.196376	0.01026	0.00442154	0.00925083	0.00252201	0.017417	0.00392845	0.00737005	0.00176223
cg07211259	chr9	5510497	OpenSea	PDCD1LG2	TSS200	4	0.00914844	0.00170332	7.83305e-08	0.00929622	0.00186085	5.86284e-07	0.00137007	0.0957817	3.31778	0.345175	0.0098929	0.00464863	0.00795147	0.0025878	0.0166215	0.00412003	0.00739973	0.00283745
cg02716792	chr16	81480551	S_Shore	CMIP	Body	4	-0.00462272	0.000927116	6.16002e-07	-0.00462864	0.000939822	8.43511e-07	0.000262945	0	2.44198	0.485868	-0.00340721	0.00301117	-0.00359393	0.00142228	-0.00859727	0.00258891	-0.0048047	0.00139093
cg06501716	chr22	19436948	S_Shore	C22orf39;C22orf39	TSS1500;TSS1500	4	0.00661431	0.00134727	9.13476e-07	0.00661431	0.00134727	9.13476e-07	0	0	1.29511	0.730293	0.00329914	0.00409097	0.00710552	0.00230512	0.00978237	0.00371026	0.00642472	0.00189409
cg01963224	chr14	71791671	S_Shelf			4	-0.00557375	0.00113549	9.16873e-07	-0.00557375	0.00113549	9.16873e-07	0	0	1.09514	0.778248	-0.00787293	0.00362141	-0.00445421	0.00155718	-0.00539344	0.00305749	-0.00653744	0.00197157
cg26335127	chr14	55595666	N_Shore	LGALS3	TSS1500	2	-0.0125987	0.00260053	1.26827e-06	-0.0125987	0.00260053	1.26827e-06	0	0	0.314268	0.575073					-0.016478	0.00635086	-0.0119257	0.00272527
cg01439754	chr2	112293267	OpenSea			4	0.00759113	0.00155743	1.09289e-06	0.0075957	0.00156854	1.28197e-06	0.000315335	0	2.82176	0.419931	0.0133393	0.00394503	0.00645231	0.00263687	0.00298524	0.00567933	0.00716835	0.00220826
cg02488934	chr1	156422580	N_Shelf			4	0.00666781	0.00140109	1.94546e-06	0.00666781	0.00140109	1.94546e-06	0	0	0.387739	0.942764	0.00858958	0.00422735	0.0062886	0.00213306	0.00793509	0.00383663	0.00627836	0.00216614
cg01101459	chr1	234871477	OpenSea			4	0.00827826	0.00176716	2.80658e-06	0.00827828	0.00176724	2.8091e-06	2.74424e-05	0	2.33468	0.50591	0.00689197	0.00503212	0.00581185	0.00301894	0.0153303	0.00506495	0.00890761	0.00250395
cg01644741	chr20	47896888	S_Shore	MIR1259;SNORD12B;C20orf199;C20orf199;SNORD12;C20orf199	Body;Body;Body;Body;TSS1500;Body	4	0.00623889	0.00133541	2.98432e-06	0.00623889	0.00133541	2.98432e-06	0	0	2.47298	0.480193	0.00723482	0.00364932	0.00700229	0.00265196	0.0109903	0.0034684	0.00466011	0.00180172
cg15156975	chr17	43449055	Island			4	0.00725322	0.0015767	4.21998e-06	0.00725322	0.0015767	4.21998e-06	0	0	1.73353	0.629505	0.00820711	0.00502739	0.0064287	0.00267595	0.00318935	0.00354222	0.00919405	0.00233484
cg15962267	chr5	138612986	S_Shelf	SNHG4;SNORA74A;MATR3	Body;TSS1500;5'UTR	4	0.00621575	0.00135207	4.2817e-06	0.00621575	0.00135207	4.2817e-06	0	0	0.390299	0.942239	0.00505581	0.00363974	0.00753308	0.00242394	0.00617264	0.00354341	0.00585156	0.00192575
cg02419321	chr12	54811762	N_Shore	ITGA5	Body	4	-0.00633553	0.00138167	4.53121e-06	-0.00633553	0.00138167	4.53121e-06	0	0	0.18212	0.980423	-0.00609629	0.00464201	-0.00602989	0.00196244	-0.00800516	0.00353807	-0.00610281	0.0022913
cg27019717	chr14	52351055	OpenSea	GNG2	5'UTR	4	-0.00842019	0.00184429	4.98177e-06	-0.00842019	0.00184429	4.98177e-06	0	0	0.445155	0.930764	-0.0103434	0.00465645	-0.00859642	0.00254238	-0.00901256	0.00449481	-0.0063374	0.00367854
cg10896594	chr8	833183	S_Shore			3	0.0087072	0.00191317	5.33423e-06	0.0087072	0.00191317	5.33423e-06	0	0	0.415171	0.812544	0.00930896	0.00400762	0.00781123	0.00237065	0.0107956	0.00389913
cg10603136	chr8	121095224	OpenSea			4	0.00616433	0.00135973	5.80113e-06	0.00616433	0.00135973	5.80113e-06	0	0	0.320324	0.956162	0.00690656	0.00396529	0.00593762	0.00239079	0.00819517	0.0039723	0.00582735	0.00187498
cg15852826	chr6	31528915	OpenSea			4	0.0058207	0.00129335	6.78004e-06	0.0058207	0.00129335	6.78004e-06	0	0	2.17831	0.536233	0.00968109	0.00405753	0.006873	0.00229105	0.00777629	0.00373015	0.00421111	0.00175303
cg06342416	chr21	45773569	OpenSea	TRPM2;TRPM2	5'UTR;1stExon	4	-0.00299228	0.000666518	7.14198e-06	-0.00299228	0.000666518	7.14198e-06	0	0	2.25754	0.520704	-0.00473729	0.00188489	-0.0033605	0.00118903	-0.00492866	0.00236195	-0.0021267	0.000892145
cg27332583	chr18	35150602	S_Shelf			4	0.0049734	0.00110997	7.44084e-06	0.0049734	0.00110997	7.44084e-06	0	0	1.23413	0.744831	0.00238671	0.00337307	0.00621855	0.00179074	0.00622428	0.00326113	0.00444956	0.00160347
cg02417427	chr5	79479211	OpenSea	SERINC5	Body	4	-0.00604791	0.00135022	7.49279e-06	-0.00604791	0.00135022	7.49279e-06	0	0	0.934753	0.817034	-0.00935099	0.00450993	-0.00568023	0.00212664	-0.00828193	0.00394415	-0.0051653	0.00195016
cg05724871	chr18	6414446	Island	L3MBTL4	5'UTR	3	0.00879662	0.00196839	7.86037e-06	0.00879662	0.00196839	7.86037e-06	0	0	0.937061	0.625922	0.00832181	0.00400699	0.0101704	0.00243557	0.00488238	0.00417761
cg15473329	chr19	39862918	OpenSea	SAMD4B	Body	4	0.00621181	0.00139709	8.73813e-06	0.00621181	0.00139709	8.73813e-06	0	0.00905707	3.02742	0.387417	0.0113066	0.00332086	0.00451705	0.00227792	0.00409816	0.00462871	0.0059262	0.00211422
cg11639708	chr6	20209127	N_Shelf	MBOAT1	Body	4	0.00778615	0.00175244	8.87005e-06	0.00778615	0.00175244	8.87005e-06	0	0	1.62004	0.654854	0.00759748	0.00480367	0.00766018	0.00302127	0.0139564	0.0047779	0.00659927	0.00252085
cg03910874	chr6	209712	OpenSea			4	0.00667487	0.00134931	7.54165e-07	0.00674221	0.00152802	1.02234e-05	0.00129868	0.201745	3.7582	0.288786	0.0129843	0.00379964	0.00669752	0.00208246	0.00298603	0.00342438	0.00587562	0.00214845
cg24483081	chr11	45832538	OpenSea	SLC35C1;SLC35C1;SLC35C1	Body;Body;Body	4	0.00728074	0.00165939	1.14602e-05	0.00728074	0.00165939	1.14602e-05	0	0	0.263587	0.966725	0.00488321	0.00524326	0.00707123	0.00301627	0.0074024	0.00516371	0.00788736	0.00218827
cg00014104	chr22	22220367	N_Shore	MAPK1;MAPK1	Body;Body	4	-0.0079523	0.00181292	1.15206e-05	-0.0079523	0.00181292	1.15206e-05	0	0	1.16652	0.761045	-0.012344	0.0045476	-0.00663358	0.00303513	-0.00892673	0.0052842	-0.00702213	0.00269817
cg22665692	chr10	128593943	Island	DOCK1	TSS200	3	0.00890689	0.00203294	1.17979e-05	0.00890689	0.00203294	1.17979e-05	0	0	1.30945	0.519584	0.010852	0.00367513	0.00912288	0.00251204	0.00259053	0.00543481
cg08080174	chr16	72992580	N_Shore	ZFHX3;ZFHX3	Body;5'UTR	4	0.0073619	0.00168657	1.27109e-05	0.0073619	0.00168657	1.27109e-05	0	0	2.08983	0.553972	0.006728	0.00418747	0.00530114	0.00251901	0.0134084	0.00478579	0.00848485	0.00282584
cg02379533	chr5	154214618	OpenSea	C5orf4	Body	4	0.0056295	0.00112427	5.52181e-07	0.00592074	0.00136387	1.41759e-05	0.00127176	0	2.96956	0.396342	0.00612726	0.00375275	0.00720725	0.0020019	0.0104078	0.00365734	0.00415793	0.00147499
cg22481695	chr7	127035858	S_Shelf			4	-0.0102511	0.00237785	1.62461e-05	-0.0102552	0.0023874	1.74277e-05	0.000399338	0	2.91822	0.404407	-0.00613246	0.0062769	-0.00812997	0.0036905	-0.0187351	0.00501394	-0.00963353	0.00418323
cg21556967	chr4	156132665	S_Shelf	NPY2R	5'UTR	3	0.00612214	0.00142839	1.8188e-05	0.00612214	0.00142839	1.8188e-05	0	0	0.206017	0.90212	0.0064161	0.00340024			0.0072767	0.00294581	0.00574778	0.00174114
cg13940444	chr12	53617382	S_Shelf	RARG	Body	4	-0.00810653	0.00189452	1.8779e-05	-0.00810653	0.00189452	1.8779e-05	0	0	0.873499	0.831818	-0.00830627	0.00470131	-0.00626857	0.00277725	-0.0117956	0.00486907	-0.00893687	0.00336317
cg15489693	chr4	10498037	OpenSea	CLNK	Body	3	0.00989835	0.00231342	1.88024e-05	0.00989835	0.00231342	1.88024e-05	0	0	0.103543	0.949546	0.00953443	0.0049301	0.0095565	0.00290042	0.0112272	0.00447327
cg24935896	chr1	201431492	OpenSea			4	0.00590938	0.00132368	8.03044e-06	0.00593778	0.00138846	1.89835e-05	0.000733843	0	2.68057	0.44354	0.00756782	0.00405875	0.00312781	0.00214914	0.00914324	0.00340379	0.00688874	0.00195944
cg19948549	chr4	4420530	OpenSea	D4S234E;D4S234E	3'UTR;3'UTR	4	-0.00546491	0.0012813	1.99798e-05	-0.00546491	0.0012813	1.99798e-05	0	0	1.65468	0.647055	-0.00605333	0.00543009	-3.95311e-05	0.00412425	-0.00571168	0.00554911	-0.00593746	0.00138402
cg00639635	chr6	143837891	OpenSea			4	0.00529245	0.0012415	2.01758e-05	0.00529245	0.0012415	2.01758e-05	0	0	2.06618	0.558785	0.00864366	0.00343821	0.00321434	0.00200384	0.00558651	0.00344601	0.00598433	0.00186072
cg05907036	chr4	170073962	OpenSea	SH3RF1	Body	4	0.00448408	0.00105209	2.02555e-05	0.00448408	0.00105209	2.02555e-05	0	0	1.02526	0.79514	0.00682412	0.00425411	0.00621184	0.00258816	0.00556158	0.00370242	0.00389044	0.0012039
cg07992484	chr2	106724161	OpenSea	UXS1	Body	4	0.00643872	0.00151417	2.11575e-05	0.00643872	0.00151417	2.11575e-05	0	0	1.44123	0.6959	0.00571911	0.00467582	0.00467155	0.00226653	0.00987557	0.00375027	0.0074741	0.00244085
cg24107852	chr7	127960508	OpenSea	RBM28;RBM28	Body;Body	3	-0.00800987	0.00180924	9.54597e-06	-0.00810583	0.00190714	2.13537e-05	0.000897209	0.107924	2.24196	0.32596	-0.0140062	0.00437643	-0.00650381	0.00217039	-0.00767427	0.00353656
cg14410137	chr9	96269920	OpenSea	FAM120A	Body	4	0.00436148	0.00102626	2.13872e-05	0.00436148	0.00102626	2.13872e-05	0	0	1.36383	0.714034	0.00114774	0.00309076	0.00454895	0.00176126	0.0059355	0.00274809	0.00466533	0.0014517
cg26579578	chr11	69707303	S_Shore			3	0.00527027	0.00124348	2.25183e-05	0.00527027	0.00124348	2.25183e-05	0	0	1.25881	0.532908	0.00667648	0.00290536	0.00565243	0.00144985	0.00212537	0.00277891
cg13462957	chr7	142493732	N_Shore			4	-0.00713798	0.0016846	2.26336e-05	-0.00713798	0.0016846	2.26336e-05	0	0	0.799378	0.849616	-0.00547276	0.00510716	-0.0064344	0.00271739	-0.0111623	0.00436541	-0.00690809	0.00250831
cg15065837	chr6	31828150	N_Shelf	NEU1	Body	4	-0.00167647	0.000396544	2.36101e-05	-0.00167647	0.000396544	2.36101e-05	0	0	1.39931	0.705697	-0.00146861	0.00251031	-0.000464375	0.00300043	0.00174597	0.00281209	-0.00174446	0.00039831
cg27410595	chr11	119995754	OpenSea	TRIM29	Body	4	0.00561831	0.00133108	2.43371e-05	0.00561831	0.00133108	2.43371e-05	0	0	1.04685	0.789918	0.00617568	0.00406248	0.00740195	0.00216489	0.0047793	0.0034945	0.00440642	0.00195904
cg02711665	chr8	11664728	N_Shore	FDFT1	Body	4	-0.0108344	0.00256918	2.47518e-05	-0.0108344	0.00256918	2.47518e-05	0	0	0.484719	0.922235	-0.0106373	0.00533424	-0.00967043	0.00415166	-0.00837907	0.00637441	-0.0131905	0.00458188
cg21382649	chr12	125225808	S_Shelf			4	0.00618933	0.00133404	3.4921e-06	0.0063102	0.00150745	2.83907e-05	0.00108547	0	2.2936	0.513748	0.00548332	0.00485114	0.00598672	0.00244096	0.0142777	0.00497744	0.00567349	0.00168055
cg17287034	chr10	127897162	OpenSea	ADAM12;ADAM12	Body;Body	4	-0.0115969	0.00277923	3.01011e-05	-0.0115969	0.00277923	3.01011e-05	0	0	2.11386	0.549114	-0.00427892	0.00819801	-0.0174275	0.00552108	-0.00672689	0.00860595	-0.0112736	0.0035715
cg02890434	chr2	200819881	N_Shore	C2orf60;C2orf60;C2orf47	Body;Body;TSS200	4	-0.00185018	0.000443483	3.02036e-05	-0.00185018	0.000443483	3.02036e-05	0	0	1.46243	0.690968	-0.000415596	0.00165846	-0.00140513	0.000814845	-0.00180358	0.00114364	-0.00223947	0.000586653
cg09200921	chr13	49867061	OpenSea	CDADC1	3'UTR	4	-0.00589595	0.00141597	3.12882e-05	-0.00589595	0.00141597	3.12882e-05	0	0	0.710895	0.870638	-0.0059075	0.00468698	-0.00500733	0.00211358	-0.0092002	0.00379469	-0.00578269	0.0021949
cg01116137	chr20	25034263	N_Shelf	ACSS1	Body	4	-0.00847773	0.00203691	3.15408e-05	-0.00847773	0.00203691	3.15408e-05	0	0	0.326219	0.955024	-0.00945094	0.0049042	-0.00878039	0.00297934	-0.00560414	0.00510234	-0.00856136	0.00372932
cg02717339	chr2	97524767	S_Shore	ANKRD39	TSS1500	4	0.00681717	0.00163874	3.18232e-05	0.00681717	0.00163874	3.18232e-05	0	0	2.01333	0.569645	0.00798837	0.00429849	0.0101257	0.00289404	0.00454679	0.00426066	0.00501882	0.00237905
cg15970666	chr2	162095662	Island			4	0.00700142	0.00168679	3.31414e-05	0.00700142	0.00168679	3.31414e-05	0	0	2.77867	0.427023	0.00324166	0.00447849	0.0101388	0.00272262	0.000287955	0.00605537	0.00678225	0.00244294
cg24362829	chr1	178455607	N_Shore			4	0.00655775	0.00158109	3.35972e-05	0.00655775	0.00158109	3.35972e-05	0	0	0.777999	0.854722	0.00444345	0.0047401	0.00856808	0.00268829	0.00627466	0.00406097	0.00586463	0.00227593
cg13555415	chr9	134454249	OpenSea	RAPGEF1;RAPGEF1	3'UTR;3'UTR	4	0.0032144	0.000775386	3.38995e-05	0.0032144	0.000775386	3.38995e-05	0	0	0.583001	0.900313	0.00413481	0.00338878	0.00435665	0.00201571	0.00491684	0.00458352	0.00294933	0.000849872
cg07708016	chr15	30511386	N_Shelf			2	0.0137062	0.00332435	3.74024e-05	0.0137062	0.00332435	3.74024e-05	0	0	0.047798	0.82694	0.0142141	0.00407616			0.0125923	0.00501042
cg07970325	chr6	106497542	OpenSea			4	0.00486445	0.00118026	3.76409e-05	0.00486445	0.00118026	3.76409e-05	0	0	0.144977	0.985941	0.00418443	0.00355051	0.00550621	0.00202082	0.00408514	0.0036909	0.00481381	0.00162291
cg20941184	chr1	209878178	OpenSea	HSD11B1;HSD11B1	5'UTR;TSS200	3	0.00835333	0.00203149	3.92376e-05	0.00835333	0.00203149	3.92376e-05	0	0	0.256133	0.879795	0.010451	0.00461843	0.00793382	0.00244262	0.00767454	0.00416948
cg26328951	chr1	28906514	N_Shore	SNHG12;SNORD99;SNORA61	Body;TSS1500;TSS200	4	0.00536887	0.00130646	3.96557e-05	0.00536887	0.00130646	3.96557e-05	0	0	0.199722	0.977634	0.00446334	0.0034006	0.00542143	0.00223624	0.00425715	0.00363601	0.00595983	0.00190923
cg06970090	chr10	73848823	S_Shore	SPOCK2;SPOCK2	TSS200;TSS200	4	-0.00627759	0.00153091	4.12134e-05	-0.00627759	0.00153091	4.12134e-05	0	0	1.96355	0.580007	-0.00983175	0.00475068	-0.00375478	0.00237579	-0.00945685	0.00448726	-0.00684401	0.00227213
cg10471113	chr16	1587842	Island	IFT140;TMEM204	Body;Body	3	-0.0226669	0.00552993	4.15034e-05	-0.0226669	0.00552993	4.15034e-05	0	0	0.718506	0.698198	-0.0172931	0.0107795	-0.0269579	0.00724402	-0.0186418	0.0105445
cg05307752	chr2	144462886	OpenSea	ARHGAP15	Body	4	0.0105054	0.00224599	2.90534e-06	0.0107041	0.00261467	4.24247e-05	0.00246131	0.20499	3.77354	0.286979	0.0174833	0.00574358	0.0115003	0.00329094	0.0131735	0.00568855	0.00485562	0.00395238
cg14975122	chr1	32761824	S_Shelf	HDAC1	Body	4	0.0054588	0.00133988	4.61953e-05	0.0054588	0.00133988	4.61953e-05	0	0	1.11108	0.7744	0.00853316	0.00373565	0.00553465	0.00224604	0.00661878	0.00368857	0.00435406	0.00195107
cg21535931	chr8	145029603	S_Shore	PLEC1;PLEC1	Body;Body	4	-0.0119216	0.00292987	4.72178e-05	-0.0119216	0.00292987	4.72178e-05	0	0.421998	5.19029	0.158382	-0.0012728	0.00716037	-0.0137981	0.00486943	-0.028466	0.0086558	-0.0108652	0.00441518
cg04103706	chr3	188514728	OpenSea	LPP;LPP;LPP	Body;Body;Body	2	0.0116935	0.00287683	4.80879e-05	0.0116935	0.00287683	4.80879e-05	0	0	0.000771812	0.977836	0.0110107	0.0203584			0.011643	0.00258447
cg20207763	chr10	13392088	OpenSea			3	0.00653902	0.00161106	4.93193e-05	0.00653902	0.00161106	4.93193e-05	0	0	0.991951	0.608977	0.0100543	0.00388996	0.00574681	0.00187215	0.00621516	0.00352381
cg26107597	chr14	31343283	N_Shore	COCH;COCH	TSS1500;TSS1500	4	0.00812023	0.00200288	5.02891e-05	0.00812023	0.00200288	5.02891e-05	0	0	0.454387	0.928792	0.0103617	0.00669126	0.00831832	0.00348819	0.00467019	0.00517403	0.00854237	0.00277307
cg00489660	chr11	57089821	N_Shore	TNKS1BP1	5'UTR	4	0.00554057	0.0012753	1.39579e-05	0.00555173	0.00136968	5.05021e-05	0.000901828	0.158024	3.56305	0.312677	0.00212232	0.00309833	0.00477006	0.00222565	0.0112877	0.00348883	0.00605063	0.00189204
cg06644515	chr1	173834831	N_Shelf	SNORD47;GAS5;SNORD81;SNORD80;SNORD78;SNORD79	TSS1500;Body;TSS1500;TSS1500;TSS200;TSS1500	4	0.00671686	0.00165861	5.12848e-05	0.00671686	0.00165861	5.12848e-05	0	0	1.68912	0.639355	0.00662999	0.00483212	0.00942548	0.00274417	0.00783332	0.00456777	0.00460965	0.0024093
cg18016128	chr17	16396497	S_Shore	C17orf76;C17orf76	TSS1500;TSS1500	4	0.00499144	0.00123678	5.44093e-05	0.00499144	0.00123678	5.44093e-05	0	0	0.0991476	0.99194	0.00449678	0.0034872	0.00553023	0.00213946	0.00420883	0.00344002	0.00501942	0.00175381
cg00982214	chr1	202614080	S_Shore	SYT2;SYT2	TSS1500;5'UTR	2	0.0108408	0.00268811	5.50956e-05	0.0108408	0.00268811	5.50956e-05	0	0	0.186311	0.666005	0.0116619	0.00328471			0.00914044	0.00407789
cg26835506	chr6	109038353	OpenSea			4	0.00470756	0.00116797	5.56467e-05	0.00470756	0.00116797	5.56467e-05	0	0	1.62943	0.652734	0.00524654	0.00417742	0.00297708	0.00196242	0.00786807	0.00315144	0.00511223	0.00161874
cg11428546	chr2	100723110	S_Shelf	AFF3;AFF3	TSS1500;5'UTR	4	-0.00280093	0.00069559	5.65666e-05	-0.00280093	0.00069559	5.65666e-05	0	0	2.21462	0.529075	-0.00246198	0.00259973	-0.00411003	0.001623	-0.00657169	0.00298486	-0.00227689	0.000799201
cg14971544	chr1	54955149	Island			4	-0.00350556	0.000870897	5.69201e-05	-0.00350556	0.000870897	5.69201e-05	0	0	0.263656	0.966712	-0.0046296	0.00248385	-0.00337647	0.00146127	-0.00383432	0.00229557	-0.00315786	0.00127281
cg05226180	chr10	79362117	OpenSea	KCNMA1;KCNMA1;KCNMA1;KCNMA1	Body;Body;Body;Body	3	0.00932811	0.00231771	5.70469e-05	0.00932811	0.00231771	5.70469e-05	0	0	1.37941	0.501725	0.00994286	0.00464919	0.00716893	0.00301593	0.0137856	0.00434704
cg25182165	chr17	55191642	OpenSea	AKAP1	Body	4	0.0051053	0.00126982	5.80773e-05	0.0051053	0.00126982	5.80773e-05	0	0	0.699944	0.873217	0.0056554	0.00451885	0.00564584	0.00228926	0.00229665	0.00312618	0.00551268	0.00172669
cg14114814	chr11	95328466	OpenSea			4	-0.00156538	0.000389761	5.91287e-05	-0.00156538	0.000389761	5.91287e-05	0	0	0.753647	0.860519	0.000176448	0.00244269	-0.00194164	0.00163854	-0.00276511	0.00233096	-0.00154753	0.000400527
cg00339769	chr6	24489855	OpenSea	GPLD1;GPLD1	TSS200;TSS200	4	0.00517747	0.0012892	5.91872e-05	0.00517747	0.0012892	5.91872e-05	0	0	0.95884	0.81121	0.00723722	0.00376962	0.00600755	0.00207388	0.00218726	0.00387742	0.00467447	0.00187543
cg13359998	chr1	230241764	OpenSea	GALNT2	Body	4	0.00567924	0.00141478	5.9642e-05	0.00567924	0.00141478	5.9642e-05	0	0	0.989641	0.803758	0.00845915	0.00433963	0.00579979	0.00200337	0.00232167	0.00382186	0.00584949	0.00237311
cg03411579	chr12	76552736	OpenSea			4	0.00984654	0.00188887	1.85892e-07	0.0109888	0.00273919	6.02808e-05	0.00360132	0.456078	5.51549	0.137715	0.016239	0.00540638	0.0129405	0.00329254	0.0145631	0.00526429	0.00547426	0.00265448
cg14780632	chr11	65816521	Island	GAL3ST3;GAL3ST3	5'UTR;1stExon	4	0.00414903	0.00103472	6.07701e-05	0.00414903	0.00103472	6.07701e-05	0	0	1.54827	0.671176	0.0010736	0.00397618	0.00303419	0.00234909	0.00103251	0.00439642	0.0049464	0.00119413
cg07904549	chr13	113344745	Island	ATP11A;ATP11A	1stExon;1stExon	4	0.000639739	0.000159657	6.15061e-05	0.000639739	0.000159657	6.15061e-05	0	0	1.30248	0.728545	-0.000645535	0.00116119	0.000443236	0.000785604	0.000748193	0.00111793	0.000677554	0.000161738
cg10075819	chr2	109229337	OpenSea	LIMS1	5'UTR	4	0.00510104	0.00127388	6.21962e-05	0.00510104	0.00127388	6.21962e-05	0	0	1.06227	0.786188	0.00219562	0.00345363	0.00576901	0.00195552	0.00363875	0.00335984	0.00599416	0.00204121
cg05441596	chr4	905441	N_Shelf	GAK	Body	4	-0.00130654	0.000327149	6.50438e-05	-0.00130654	0.000327149	6.50438e-05	0	0	0.326556	0.954959	-0.000787166	0.00254707	-0.000683068	0.00187536	-0.00253439	0.00235386	-0.00130124	0.000329118
cg23996071	chr1	60280809	Island	HOOK1	1stExon	4	0.0048603	0.00121727	6.53052e-05	0.0048603	0.00121727	6.53052e-05	0	0	1.50734	0.680578	0.00330437	0.00342443	0.00661437	0.00193285	0.00614111	0.00350733	0.00362871	0.00182473
cg13897374	chr5	150004783	Island	SYNPO;SYNPO	Body;Body	4	0.00704514	0.00171223	3.87841e-05	0.00704952	0.00176613	6.56532e-05	0.000742575	0.104111	3.34863	0.340932	0.000867768	0.00460687	0.0105032	0.0030638	0.010252	0.00491053	0.00623064	0.00239378
cg12895546	chr11	68202244	S_Shore	LRP5	Body	3	-0.00791832	0.00198514	6.64086e-05	-0.00791832	0.00198514	6.64086e-05	0	0	1.40146	0.496223	-0.00392423	0.00692166	-0.00619855	0.0027154	-0.010547	0.00266715
cg02254407	chr11	73357159	OpenSea	PLEKHB1;PLEKHB1;PLEKHB1;PLEKHB1	TSS200;TSS200;TSS1500;TSS1500	4	-0.00467498	0.00117218	6.65589e-05	-0.00467498	0.00117218	6.65589e-05	0	0	0.0659735	0.995581	-0.00493363	0.00484614	-0.00478789	0.00289039	-0.00306422	0.00638327	-0.004636	0.00130546
cg21862081	chr14	77769687	OpenSea	POMT2	Body	4	0.00651891	0.00146905	9.10093e-06	0.00688487	0.00172755	6.73834e-05	0.00158117	0.241622	3.95581	0.266275	0.0116163	0.00426913	0.00565948	0.00247158	0.0127403	0.00434663	0.0047561	0.00207897
cg06558622	chr7	149543177	OpenSea	ZNF862	Body	3	0.00875951	0.00219519	6.5984e-05	0.0087643	0.0022003	6.79857e-05	0.00021422	0.212403	2.53937	0.28092	0.00767296	0.00456984	0.00742077	0.00258109	0.0179661	0.0055711
cg19567891	chr15	89921083	Island	LOC254559	TSS200	4	-0.0058272	0.00145348	6.09397e-05	-0.00584098	0.00146654	6.80962e-05	0.000291322	0.102981	3.34441	0.341509	-0.0148058	0.00553709	-0.00708081	0.00289764	-0.00353897	0.00449847	-0.00462995	0.00179663
cg15108641	chr10	99263320	S_Shelf	UBTD1	Body	4	0.00730714	0.00183555	6.86577e-05	0.00730714	0.00183555	6.86577e-05	0	0	0.787531	0.852447	0.00858977	0.00620021	0.00595699	0.00301088	0.0113381	0.00502222	0.00723941	0.00260232
cg06893362	chr20	47897124	S_Shore	C20orf199;C20orf199;SNORD12;C20orf199	Body;Body;TSS200;Body	4	0.0066052	0.00166077	6.97346e-05	0.0066052	0.00166077	6.97346e-05	0	0	0.85277	0.836808	0.00817153	0.00429302	0.00873852	0.00316207	0.00538022	0.00398821	0.00543128	0.00236965
cg17129388	chr17	47571986	N_Shore	NGFR	TSS1500	4	0.00512585	0.0012891	6.99944e-05	0.00512585	0.0012891	6.99944e-05	0	0	1.6172	0.655495	0.00272082	0.00434739	0.00614325	0.00220105	0.000716668	0.00376875	0.005788	0.00175737
cg00407537	chr16	57576394	OpenSea	GPR114	TSS1500	4	-0.00553785	0.0012553	1.0262e-05	-0.00581734	0.00146314	7.0107e-05	0.00129811	0.238712	3.94069	0.26794	-0.0106053	0.00419871	-0.00423497	0.00200902	-0.010802	0.0034627	-0.00429269	0.00181224
cg06934654	chr16	89180742	OpenSea	ACSF3;ACSF3;ACSF3	Body;Body;Body	4	0.00393637	0.000990415	7.05363e-05	0.00393637	0.000990415	7.05363e-05	0	0	1.02578	0.795014	0.0019586	0.00361856	0.00448809	0.0015988	0.00105613	0.00325439	0.00432291	0.00135632
cg04218022	chr15	25974140	OpenSea	ATP10A	Body	2	-0.0107074	0.00256616	3.01213e-05	-0.0106958	0.00269286	7.13028e-05	0.00115326	0.0915372	1.10076	0.294099	-0.0132958	0.0035103			-0.00796402	0.00330719
cg19662554	chr8	6663633	N_Shore			4	0.00443263	0.00111723	7.26207e-05	0.00443263	0.00111723	7.26207e-05	0	0	1.16014	0.762579	0.00492265	0.00330855	0.00529099	0.00176545	0.00630942	0.00300973	0.00314692	0.00168493
cg05363382	chr17	45767653	N_Shelf			4	0.00556656	0.00140325	7.28086e-05	0.00556656	0.00140325	7.28086e-05	0	0	1.16622	0.761117	0.00331344	0.00420267	0.00765144	0.00229235	0.00477815	0.00366904	0.00481771	0.00206994
cg10097651	chr14	35802397	OpenSea			3	-0.0068633	0.00173073	7.32247e-05	-0.0068633	0.00173073	7.32247e-05	0	0	1.09189	0.579293	-0.0108056	0.00432521	-0.00643239	0.00198782	-0.00478045	0.00383926
cg25320169	chr2	206641630	OpenSea	NRP2;NRP2;NRP2;NRP2;NRP2	3'UTR;Body;3'UTR;Body;Body	4	0.00436838	0.00110356	7.54384e-05	0.00436838	0.00110356	7.54384e-05	0	0	1.97134	0.578377	0.00837717	0.00316149	0.0032759	0.0018038	0.00379815	0.0028456	0.00433696	0.00165266
cg04865531	chr22	51159147	Island	SHANK3	Body	4	-0.00244265	0.000618475	7.83214e-05	-0.00244265	0.000618475	7.83214e-05	0	0	0.426418	0.934733	-0.00342287	0.00276705	-0.0017024	0.002038	-0.000910746	0.00326444	-0.00248478	0.000658692
cg20628376	chr10	28758087	OpenSea			4	0.00565025	0.00143097	7.863e-05	0.00565025	0.00143097	7.863e-05	0	0	0.945861	0.814349	0.00706265	0.0037031	0.00568345	0.00206366	0.00808637	0.00366174	0.00404726	0.00254951
cg24158157	chr10	124581726	S_Shelf			3	0.00766661	0.00194428	8.0416e-05	0.00766661	0.00194428	8.0416e-05	0	0	1.25453	0.534052	0.00321082	0.00465191	0.00810995	0.00233278	0.0100906	0.003833
cg22845912	chr8	134059874	OpenSea	SLA;TG;SLA;SLA	Body;Body;Body;Body	4	0.00582079	0.00139165	2.88114e-05	0.00597226	0.00151495	8.07301e-05	0.00106259	0.0983723	3.32732	0.343859	0.00897408	0.003679	0.00469371	0.0022955	0.0118171	0.00397255	0.00439992	0.00206672
cg11941546	chr17	7165842	Island	CLDN7	TSS200	4	0.00178234	0.000452214	8.10237e-05	0.00178234	0.000452214	8.10237e-05	0	0	0.427095	0.93459	0.00304685	0.00237673	0.00126227	0.001629	0.00226689	0.00252631	0.00177646	0.000473226
cg04204669	chr11	2193742	OpenSea	TH;TH;TH	TSS1500;TSS1500;TSS1500	4	0.00613917	0.00149959	4.24194e-05	0.00612618	0.00155456	8.12183e-05	0.000729373	0	2.03947	0.564255	0.00641251	0.00404493	0.00870002	0.00228849	0.0040886	0.00411873	0.00407448	0.00239331
cg01823925	chr5	156967901	OpenSea	ADAM19	Body	4	0.00503508	0.00128033	8.40161e-05	0.00503508	0.00128033	8.40161e-05	0	0	0.0816806	0.993941	0.00471733	0.00347841	0.0055141	0.0019828	0.00435218	0.00330694	0.00497131	0.00204502
cg27665985	chr15	66116727	OpenSea			4	0.00499111	0.00126948	8.43749e-05	0.00499111	0.00126948	8.43749e-05	0	0	1.43591	0.697139	0.00176681	0.00407093	0.0040494	0.00191236	0.00645552	0.00332073	0.00638128	0.00197777
cg00573330	chr4	330651	Island	ZNF141	TSS1500	4	0.00078851	0.000200831	8.62895e-05	0.00078851	0.000200831	8.62895e-05	0	0	0.294305	0.961096	-0.000299257	0.00202259	0.000944374	0.00123501	0.000877396	0.00134885	0.000801575	0.000201204
cg01008894	chr4	3363509	N_Shore	RGS12;RGS12	Body;Body	4	0.00446401	0.00113766	8.7148e-05	0.00446401	0.00113766	8.7148e-05	0	0	0.928204	0.818617	0.0021988	0.00375004	0.00593892	0.00198042	0.00476338	0.00341768	0.00403329	0.00153222
cg19371652	chr12	113415883	OpenSea	OAS2;OAS2;OAS2	TSS1500;TSS1500;TSS1500	4	0.00537466	0.00137076	8.82021e-05	0.00537466	0.00137076	8.82021e-05	0	0	1.62235	0.654333	0.00116222	0.00481695	0.00397289	0.00237941	0.00730331	0.00362793	0.00650321	0.00187521
cg10390435	chr8	142368026	S_Shore	GPR20	5'UTR	4	0.00491783	0.00125579	8.99855e-05	0.00491783	0.00125579	8.99855e-05	0	0	0.387176	0.942879	0.00534886	0.00493769	0.00502945	0.00238565	0.00757309	0.00430905	0.00460637	0.00155651
cg00139477	chr5	100234775	N_Shore	ST8SIA4;ST8SIA4	Body;Body	4	0.00804956	0.00206034	9.34836e-05	0.00804956	0.00206034	9.34836e-05	0	0	2.5716	0.462489	0.0111524	0.00586978	0.00760998	0.00284848	0.0138337	0.00468296	0.00410176	0.00398039
cg17008160	chr1	232315535	OpenSea			4	0.00537291	0.00137847	9.71029e-05	0.00537291	0.00137847	9.71029e-05	0	0	1.27204	0.735783	0.00232848	0.00432656	0.00733509	0.00259738	0.00715684	0.00392272	0.00477428	0.00181521
cg02450164	chr16	66493033	OpenSea	BEAN	5'UTR	4	0.00438544	0.00112575	9.79681e-05	0.00438544	0.00112575	9.79681e-05	0	0	1.85644	0.60273	0.00799283	0.00403157	0.00603019	0.0021226	0.00307378	0.00349242	0.00345136	0.00143257
cg20212624	chr17	40123227	S_Shelf	CNP	Body	4	0.00664402	0.00170555	9.79864e-05	0.00664402	0.00170555	9.79864e-05	0	0	0.522834	0.913847	0.00779973	0.00485368	0.00767102	0.00294757	0.00819021	0.00467785	0.00544859	0.00242167
cg10512745	chr1	50884480	Island	DMRTA2	Body	4	0.000879307	0.000225974	9.97517e-05	0.000879307	0.000225974	9.97517e-05	0	0	1.47588	0.687848	0.000905033	0.00239462	0.00277859	0.00149564	0.00135866	0.00250282	0.000844035	0.000224592
cg07992633	chr7	78194196	OpenSea	MAGI2	Body	2	0.00793036	0.00188334	2.54459e-05	0.00784401	0.00201742	0.000101015	0.000951163	0.0954372	1.10551	0.293061	0.00918995	0.00221579			0.00477433	0.00309922
cg16747928	chr6	4370460	OpenSea			4	0.00569835	0.00146609	0.000101592	0.00569835	0.00146609	0.000101592	0	0	1.0894	0.779635	0.00187718	0.00400507	0.00683905	0.00255229	0.00532197	0.00406628	0.00621418	0.00208968
cg24279243	chr4	38676559	OpenSea	KLF3	5'UTR	4	-0.00745599	0.00191919	0.000102346	-0.00745599	0.00191919	0.000102346	0	0	0.831985	0.841802	-0.00513437	0.00522626	-0.00855647	0.00256637	-0.00982628	0.00508615	-0.00523299	0.00373241
cg14836555	chr14	24743391	S_Shelf			4	0.00593707	0.001499	7.47366e-05	0.00597354	0.00154015	0.000105079	0.000609565	0	2.92252	0.403727	0.00547019	0.00478797	0.00625212	0.00234614	0.0126439	0.00404053	0.00416009	0.00223722
cg25694447	chr3	157824150	S_Shore	SHOX2;SHOX2;SHOX2	TSS200;TSS200;TSS200	4	-0.00262106	0.000676634	0.000107205	-0.00262106	0.000676634	0.000107205	0	0	1.40092	0.705319	-0.00366708	0.00228873	-0.00324129	0.00102587	-0.000802007	0.00197281	-0.0021962	0.0010074
cg18354686	chr16	4897378	Island	UBN1;GLYR1	TSS1500;TSS200	4	0.00107338	0.000277148	0.000107528	0.00107338	0.000277148	0.000107528	0	0	0.549937	0.907791	0.000586149	0.00081906	0.00130814	0.00059421	0.00134033	0.000897606	0.00106838	0.000344472
cg01986263	chr20	58659848	N_Shelf			4	0.00451665	0.00116648	0.000107925	0.00451665	0.00116648	0.000107925	0	0	2.19019	0.533883	0.00791987	0.00362931	0.00526435	0.00190811	0.00642453	0.00340693	0.00294242	0.00166122
cg24587175	chr10	105670608	OpenSea	OBFC1	Body	4	-0.00443243	0.00114577	0.000109498	-0.00443243	0.00114577	0.000109498	0	0	1.9702	0.578615	-0.00688017	0.00370259	-0.00218458	0.00215408	-0.0076844	0.0036352	-0.00452362	0.00147737
cg02901723	chr4	91049728	S_Shore	FAM190A	5'UTR	4	0.00209853	0.000542706	0.000110276	0.00209853	0.000542706	0.000110276	0	0	2.66818	0.445663	0.00134766	0.00307829	0.00228927	0.00145212	0.00585514	0.00216358	0.00188504	0.000594403
cg08738403	chr7	129007916	OpenSea	AHCYL2;AHCYL2;AHCYL2;AHCYL2	Body;TSS200;Body;TSS200	3	0.00343216	0.000888138	0.000111344	0.00343216	0.000888138	0.000111344	0	0	1.44017	0.48671	0.00126868	0.00224442	0.00353357	0.00103367	0.0049107	0.00185135
cg25432300	chr5	90508265	OpenSea			4	0.00690741	0.00178943	0.000113328	0.00690741	0.00178943	0.000113328	0	0	0.413765	0.937385	0.0073089	0.00453983	0.00840669	0.00297008	0.00646401	0.00454311	0.00577417	0.00276722
cg24912456	chr6	1598854	N_Shore			4	-0.00420525	0.00109022	0.000114669	-0.00420525	0.00109022	0.000114669	0	0	0.776772	0.855014	-0.00134075	0.00343255	-0.00445898	0.00231963	-0.00429514	0.00304598	-0.00452445	0.00137254
cg08184652	chr2	162270993	Island			4	0.00598988	0.00155452	0.000116587	0.00598988	0.00155452	0.000116587	0	0	0.63516	0.888338	0.00344016	0.0051599	0.0071654	0.00266098	0.00815358	0.00490489	0.00549549	0.00209507
cg08529744	chr1	151818922	OpenSea			3	0.00556182	0.00137165	5.01681e-05	0.00555628	0.00144226	0.000116921	0.000677121	0	1.97883	0.371794	0.00841331	0.00300823	0.00567236	0.00167647	0.00224825	0.00277181
cg13709487	chr3	100322493	OpenSea			4	0.00819032	0.00200422	4.37848e-05	0.00821067	0.00213194	0.000117506	0.0012703	0	2.30165	0.512205	0.00477627	0.00569825	0.0119067	0.00323478	0.0104454	0.00569353	0.00580978	0.00296505
cg09105442	chr10	1228439	N_Shelf	ADARB2	3'UTR	3	0.00866347	0.00209473	3.53659e-05	0.0087483	0.00227219	0.000118039	0.00131212	0.00199544	2.004	0.367145	0.0058412	0.00445916	0.00804116	0.00250724	0.0151702	0.004725
cg16155588	chr13	113861933	N_Shore	CUL4A;PCID2;PCID2;PCID2	TSS1500;Body;Body;Body	4	-0.00497998	0.00129487	0.000120091	-0.00497998	0.00129487	0.000120091	0	0	0.38183	0.94397	-0.00263777	0.00449056	-0.00436465	0.00283871	-0.00520841	0.00471583	-0.00535331	0.00154208
cg00830621	chr16	18799106	N_Shelf	RPS15A;RPS15A	Body;Body	3	0.00661008	0.00171876	0.00012014	0.00661008	0.00171876	0.00012014	0	0	1.57017	0.456081	0.0109104	0.00387297	0.00538025	0.00204744	0.00637137	0.00367863
cg14669130	chr1	89459504	S_Shore	CCBL2;CCBL2;RBMXL1;RBMXL1	TSS1500;TSS1500;TSS1500;TSS1500	4	0.0120956	0.00284384	2.10689e-05	0.0127654	0.00332226	0.000121852	0.00283954	0.247771	3.98815	0.262747	0.0209281	0.00725955	0.0112149	0.00520632	0.0304297	0.0125892	0.00887192	0.00377449
cg07215975	chr10	129785064	OpenSea	PTPRE	5'UTR	3	0.00647505	0.00168583	0.000122595	0.00647505	0.00168583	0.000122595	0	0	1.78289	0.410062	0.0065894	0.00348843	0.00808809	0.00214981	0.00227322	0.00321409
cg03015942	chr8	49229380	N_Shelf			4	0.00393514	0.0010252	0.000123826	0.00393514	0.0010252	0.000123826	0	0	1.52311	0.676947	0.00629564	0.00327213	0.00223558	0.00189855	0.00549797	0.00297205	0.00412162	0.00135259
cg02556649	chr11	1945564	N_Shore	TNNT3;TNNT3;TNNT3;TNNT3	Body;Body;Body;Body	4	0.00400881	0.00104623	0.000127279	0.00400881	0.00104623	0.000127279	0	0	2.54328	0.46752	0.00325028	0.00362193	0.00502051	0.00181962	0.00907391	0.00353703	0.00299874	0.00137503
cg13835894	chr2	219148914	OpenSea	PNKD;TMBIM1	Body;5'UTR	4	0.00561966	0.00146805	0.000129198	0.00561966	0.00146805	0.000129198	0	0	0.589137	0.898915	0.00234717	0.00482442	0.00623582	0.00245935	0.0070442	0.00433903	0.00564665	0.00203035
cg13190608	chr17	37322730	S_Shore	ARL5C	TSS1500	4	0.00780769	0.0020403	0.000129858	0.00780769	0.0020403	0.000129858	0	0	1.93452	0.586107	0.00668127	0.00519545	0.0122245	0.00372943	0.00346885	0.00497583	0.00693203	0.00298016
cg09493505	chr7	49813111	Island	VWC2	TSS200	3	0.00508809	0.00132962	0.00012986	0.00508809	0.00132962	0.00012986	0	0	0.650768	0.72225	0.00476922	0.00295694	0.00599084	0.00169372	0.00332915	0.00237887
cg18813353	chr12	31882203	Island	AMN1;AMN1	TSS200;TSS200	4	0.000829435	0.000216749	0.000129867	0.000829435	0.000216749	0.000129867	0	0	1.95172	0.582488	0.00129358	0.00233535	0.000118102	0.00173164	-0.0028057	0.00242355	0.000867571	0.000214662
cg19103429	chr7	92460784	N_Shore	CDK6;CDK6	Body;Body	3	-0.0084316	0.00220362	0.000130114	-0.0084316	0.00220362	0.000130114	0	0	0.455619	0.796276	-0.00721611	0.00541539	-0.00782308	0.00258074	-0.0116552	0.00460095
cg03886681	chr2	240059931	N_Shore	HDAC4	Body	4	-0.00383126	0.00100134	0.000130168	-0.00383126	0.00100134	0.000130168	0	0	2.73851	0.433723	-0.00628986	0.00480741	-0.00285434	0.00321519	-0.0114606	0.00442605	-0.0033945	0.0010729
cg26000542	chrX	43741890	S_Shore	MAOB	TSS200	2	0.0140752	0.00368038	0.000131094	0.0140752	0.00368038	0.000131094	0	0	4.21175e-05	0.994822	0.0140064	0.00622539			0.0139959	0.00403726
cg15948012	chr5	39721601	Island			2	0.00856429	0.00223969	0.000131373	0.00856429	0.00223969	0.000131373	0	0	0.0524745	0.818812	0.00903466	0.00305942			0.0079557	0.00289092
cg04522866	chr3	46586857	OpenSea	LRRC2;LRRC2	Body;Body	3	-0.00674096	0.00176415	0.000132861	-0.00674096	0.00176415	0.000132861	0	0	1.38324	0.500765	-0.0108218	0.00393627	-0.0059948	0.00209281	-0.00469353	0.00387954
cg15621697	chr4	72166462	OpenSea	SLC4A4;SLC4A4	Body;Body	4	0.00486979	0.00127451	0.000132965	0.00486979	0.00127451	0.000132965	0	0	1.23974	0.74349	0.00243172	0.00379774	0.00664798	0.00210216	0.00280731	0.00384876	0.00465047	0.00181051
cg25822709	chr9	19048850	N_Shore	RRAGA	TSS1500	4	0.00719656	0.00188452	0.000134119	0.00719656	0.00188452	0.000134119	0	0	0.828915	0.842539	0.00820181	0.00637223	0.00565957	0.00314652	0.0112788	0.00496224	0.00719101	0.00266218
cg10583893	chr19	53039743	Island	ZNF808	5'UTR	3	-0.00581427	0.00152404	0.000136157	-0.00581427	0.00152404	0.000136157	0	0	0.665733	0.716866	-0.00411647	0.00347384			-0.00846386	0.00350571	-0.00565497	0.00182828
cg26708797	chr5	170906387	OpenSea			4	-0.0039495	0.00103529	0.000136252	-0.0039495	0.00103529	0.000136252	0	0	2.26317	0.519614	-0.0070616	0.00313344	-0.0052385	0.0018056	-0.00265827	0.00294774	-0.00271254	0.00142962
cg19286686	chr2	158731699	OpenSea	ACVR1;ACVR1	5'UTR;TSS200	4	-0.00293184	0.000768731	0.000136809	-0.00293184	0.000768731	0.000136809	0	0	2.50884	0.473695	-0.00286701	0.00252342	-0.00270652	0.00119101	0.000151085	0.00208521	-0.00387079	0.00114875
cg01184194	chr5	10663596	OpenSea			4	0.00345401	0.00090595	0.000137522	0.00345401	0.00090595	0.000137522	0	0	1.02777	0.794532	0.00304106	0.00251433	0.00438142	0.00149291	0.000817968	0.00277786	0.00343818	0.00130766
cg18468511	chr14	27067638	S_Shore	NOVA1;NOVA1;NOVA1	TSS1500;TSS1500;TSS1500	4	0.00220319	0.000577988	0.000137942	0.00220319	0.000577988	0.000137942	0	0	0.85437	0.836423	0.0024249	0.0022015	0.00296864	0.00115931	0.000337286	0.00245442	0.00207558	0.000691819
cg15673240	chr2	128785822	Island	SAP130;SAP130	TSS1500;TSS1500	4	0.000692788	0.000181768	0.000138186	0.000692788	0.000181768	0.000138186	0	0	2.4622	0.482162	-0.000553929	0.00107893	0.00181739	0.00100793	0.00105883	0.00117944	0.000694127	0.000184539
cg27343325	chr20	3649247	N_Shelf	ADAM33;ADAM33	3'UTR;3'UTR	4	0.00447672	0.001092	4.13968e-05	0.00448983	0.00117873	0.000139517	0.000766175	0.12848	3.44226	0.328328	0.00070255	0.00323397	0.00437273	0.0018183	0.00945778	0.00309308	0.00446563	0.00156288
cg27637048	chr2	10271367	OpenSea	RRM2;RRM2	3'UTR;3'UTR	4	-0.00221454	0.000581613	0.000140337	-0.00221454	0.000581613	0.000140337	0	0	0.292033	0.96152	-0.00276001	0.00282405	-0.00127543	0.0020149	-0.0015695	0.00255509	-0.0022792	0.000618445
cg11525280	chr2	26624667	Island	C2orf39	TSS200	4	0.00407839	0.00107132	0.000140727	0.00407839	0.00107132	0.000140727	0	0	1.70691	0.635398	0.00494663	0.00268591	0.00465243	0.0017203	-0.000107845	0.00299394	0.00437413	0.0016663
cg25986240	chr4	9926439	OpenSea	SLC2A9;SLC2A9	Body;Body	4	0.00410254	0.00107809	0.000141598	0.00410254	0.00107809	0.000141598	0	0	1.71161	0.634356	0.00564898	0.00346994	0.00604488	0.00193462	0.00324127	0.00311596	0.00301823	0.00144368
cg05139472	chr2	140748360	OpenSea			2	0.00699487	0.00183847	0.000141962	0.00699487	0.00183847	0.000141962	0	0	0.0282283	0.866573	0.00674442	0.00229463			0.0073328	0.00268469
cg13842648	chr5	135231526	OpenSea	IL9	TSS200	4	0.00853704	0.00224387	0.000142031	0.00853704	0.00224387	0.000142031	0	0	0.192649	0.978767	0.00776541	0.00626846	0.00777534	0.00412683	0.00684883	0.00615236	0.00960937	0.00308751
cg13961576	chr10	1228316	N_Shelf	ADARB2	3'UTR	3	0.00696009	0.00182973	0.000142445	0.00696009	0.00182973	0.000142445	0	0	0.373226	0.829765	0.00514668	0.00353268	0.00784396	0.00228123	0.00678555	0.00409336
cg26325867	chr6	41398693	S_Shelf			4	0.00462944	0.00121713	0.000142629	0.00462944	0.00121713	0.000142629	0	0	0.591461	0.898384	0.00577796	0.00377178	0.00328515	0.00211497	0.00535979	0.00302594	0.00510189	0.00172929
cg05656934	chr1	57110870	Island	PRKAA2	TSS200	4	0.00226672	0.000596078	0.000143116	0.00226672	0.000596078	0.000143116	0	0	0.73848	0.864118	0.00351712	0.00367465	0.00246459	0.00199305	-0.000403589	0.00295844	0.00233476	0.000626746
cg01418817	chr1	4841913	OpenSea	AJAP1	3'UTR	4	0.00500771	0.00131735	0.000143904	0.00500771	0.00131735	0.000143904	0	0	1.90601	0.592143	0.00269659	0.00470034	0.00764745	0.00236445	0.00629606	0.00376174	0.0038269	0.00173901
cg17342132	chr5	142780254	N_Shore	NR3C1;NR3C1;NR3C1;NR3C1;NR3C1;NR3C1;NR3C1	Body;Body;Body;Body;Body;Body;Body	4	-0.00467284	0.00122926	0.000143906	-0.00467284	0.00122926	0.000143906	0	0	0.363299	0.947715	-0.00646101	0.0034241	-0.00447383	0.00221763	-0.00347815	0.00380129	-0.00446376	0.00167271
cg07708453	chr1	14032034	OpenSea	PRDM2;PRDM2;PRDM2;PRDM2;PRDM2	1stExon;5'UTR;5'UTR;5'UTR;1stExon	3	-0.00711511	0.00187288	0.000145266	-0.00711511	0.00187288	0.000145266	0	0	1.64492	0.43935	-0.00704734	0.00457365	-0.00566346	0.00221035	-0.0120768	0.00382726
cg02327719	chr1	26185386	N_Shore	C1orf135	Body	4	0.00442654	0.00116545	0.000145778	0.00442654	0.00116545	0.000145778	0	0	2.46156	0.482278	0.000661906	0.00335571	0.00657347	0.00188213	0.00362617	0.00348994	0.00399758	0.00169851
cg08304103	chr11	86662289	N_Shelf	FZD4	Body	4	0.00420183	0.00106667	8.17535e-05	0.00423071	0.00111418	0.000146364	0.000554342	0	2.37045	0.49916	0.00256987	0.00338586	0.00590837	0.00179681	0.00648119	0.00275224	0.00286442	0.00152387
cg17894755	chr10	104535794	OpenSea	C10orf26;C10orf26	TSS200;Body	4	-0.00453781	0.00118149	0.000122658	-0.0045567	0.00120044	0.000147138	0.000370271	0.134348	3.4656	0.325251	-0.00511504	0.00439496	-0.0038638	0.00181363	-0.00965217	0.00269977	-0.00304876	0.00183318
cg08727202	chr22	37414747	Island	MPST;MPST;TST;MPST;MPST	TSS1500;TSS1500;Body;TSS1500;TSS1500	4	0.00443583	0.00116928	0.000148453	0.00443583	0.00116928	0.000148453	0	0	2.77744	0.427227	0.0071303	0.00370246	0.00385716	0.00189347	0.00940613	0.00341781	0.00338263	0.00167096
cg12198934	chr17	64378035	OpenSea	PRKCA	Body	4	0.00487022	0.00125758	0.000107641	0.0048907	0.00128935	0.000148754	0.000481421	0	2.9877	0.393525	0.00537098	0.00407593	0.00289347	0.00206606	0.0104856	0.00349166	0.00502311	0.00178914
cg00745323	chr7	82959	S_Shore			4	-0.0022514	0.000593681	0.000149273	-0.0022514	0.000593681	0.000149273	0	0	1.72838	0.630644	-0.00362324	0.00417816	0.00102687	0.00246685	-0.00187752	0.00334859	-0.00239753	0.00060967
cg21167558	chr12	108955852	N_Shore	SART3;ISCU;ISCU	TSS1500;TSS1500;TSS1500	4	0.0013067	0.000344578	0.000149333	0.0013067	0.000344578	0.000149333	0	0	0.104659	0.991273	0.000703162	0.00220083	0.00118837	0.00108012	0.00149303	0.0016467	0.00134323	0.000364825
cg02615735	chr6	31648276	N_Shore	LY6G5C	TSS200	4	-0.00789546	0.00208654	0.000154332	-0.00789546	0.00208654	0.000154332	0	0	1.67917	0.641575	-0.0113534	0.00434157	-0.00878392	0.00313253	-0.00657802	0.00478961	-0.00352456	0.00430089
cg14205001	chr9	139406515	S_Shore	NOTCH1	Body	4	0.0044449	0.00117476	0.000154528	0.0044449	0.00117476	0.000154528	0	0	1.57787	0.664418	0.00696333	0.00361167	0.00496009	0.00202774	0.000449857	0.00340898	0.00443028	0.001621
cg24285903	chr6	25187166	OpenSea			4	0.00477854	0.00126394	0.000156413	0.00477854	0.00126394	0.000156413	0	0	1.53931	0.673227	0.0065168	0.00353984	0.00294485	0.00229885	0.00755799	0.00307121	0.00465543	0.00180132
cg17111087	chr1	167407514	N_Shore	CD247;CD247	Body;Body	4	-0.00637246	0.00168571	0.000156652	-0.00637246	0.00168571	0.000156652	0	0	0.940722	0.815591	-0.00668818	0.00442944	-0.00829891	0.00267835	-0.0039975	0.00449264	-0.00506311	0.00263394
cg24385652	chr10	50329828	OpenSea			4	0.00442849	0.0011684	0.000150522	0.00442736	0.00117195	0.000158231	0.000155796	0	2.76336	0.429567	0.00522575	0.00354769	0.00648418	0.00182662	-2.77073e-05	0.00339105	0.00352417	0.00173594
cg18919106	chr8	132918665	S_Shore	EFR3A	Body	4	-0.00534577	0.00141598	0.000159802	-0.00534577	0.00141598	0.000159802	0	0	0.445543	0.930682	-0.00603905	0.0037293	-0.00467277	0.00198484	-0.00802072	0.00406461	-0.00507501	0.00250381
cg26363579	chr8	1107269	S_Shore			4	0.00447155	0.00118529	0.000161604	0.00447155	0.00118529	0.000161604	0	0	1.11721	0.772922	0.00547187	0.00369652	0.00316417	0.00190831	0.00736088	0.00347145	0.00473415	0.00170606
cg23247968	chr10	104535961	OpenSea	C10orf26;C10orf26;C10orf26	5'UTR;Body;1stExon	4	-0.00340608	0.000903098	0.000162234	-0.00340608	0.000903098	0.000162234	0	0	0.790783	0.85167	-0.00426873	0.00308779	-0.00364691	0.00140146	-0.00516626	0.00253141	-0.00257892	0.00132617
cg01556466	chr7	31146260	OpenSea	ADCYAP1R1	Body	4	0.00511834	0.00135731	0.000162624	0.00511834	0.00135731	0.000162624	0	0	1.44165	0.695801	0.00953714	0.00509071	0.00465055	0.00244841	0.00775829	0.00365918	0.00433672	0.00179461
cg09186051	chr1	231981906	OpenSea	DISC1;DISC1;DISC1;DISC1;DISC1;DISC1;DISC1;TSNAX-DISC1;DISC1;DISC1;DISC1;DISC1	Body;Body;Body;Body;Body;Body;Body;Body;Body;Body;Body;Body	4	0.00497086	0.00131899	0.000164116	0.00497086	0.00131899	0.000164116	0	0	1.05093	0.78893	0.00881011	0.00421917	0.00500365	0.00216497	0.00545214	0.00383527	0.00416211	0.00186474
cg09102690	chr17	31438995	OpenSea	ACCN1;ACCN1	Body;Body	3	0.00445069	0.00118137	0.000164948	0.00445069	0.00118137	0.000164948	0	0	0.911795	0.633879	0.00533331	0.00284751			0.00231664	0.00221797	0.00502652	0.00148003
cg07734975	chr11	9780844	S_Shore			4	0.0155673	0.00413462	0.000166475	0.0155673	0.00413462	0.000166475	0	0	1.04685	0.789918	0.0242417	0.0116375	0.0164161	0.00767055	0.00698502	0.0107151	0.0152221	0.00572399
cg20742981	chr22	31644190	OpenSea	LIMK2;LIMK2;LIMK2	TSS200;TSS200;Body	4	-0.00359855	0.000900968	6.49421e-05	-0.0035979	0.000955642	0.00016661	0.000554897	0.021704	3.06656	0.381477	-0.000981361	0.00295288	-0.00229027	0.00140139	-0.00636578	0.00231227	-0.0044832	0.00136232
cg20800892	chr1	229374634	OpenSea			3	0.00708445	0.00188305	0.00016841	0.00708445	0.00188305	0.00016841	0	0	1.29816	0.522527	0.00853062	0.00429462	0.00810785	0.00229755	0.00281361	0.00368144
cg25997110	chr19	31842115	Island			4	-0.0018611	0.000494877	0.000169416	-0.0018611	0.000494877	0.000169416	0	0	0.157209	0.984182	-0.00194984	0.00192097	-0.00157955	0.000794862	-0.00213166	0.00151023	-0.00196964	0.000682285
cg16293569	chr11	2870208	N_Shore	KCNQ1;KCNQ1	3'UTR;3'UTR	4	0.00434711	0.00115618	0.000169995	0.00434711	0.00115618	0.000169995	0	0	0.9714	0.808172	0.00578943	0.0032221	0.00519518	0.0017619	0.00445918	0.00282529	0.00294274	0.00189723
cg10504993	chr15	68260453	N_Shore			4	0.00322341	0.000857485	0.000170496	0.00322341	0.000857485	0.000170496	0	0	1.70274	0.636326	-6.92519e-05	0.00295013	0.00287126	0.00142932	0.00456121	0.00262471	0.00381186	0.00117322
cg14478768	chr19	1083429	Island	HMHA1	Body	4	0.00429075	0.00113828	0.000163576	0.00429238	0.00114199	0.000170817	0.000158007	0	2.79359	0.424557	0.00349229	0.00363049	0.00260603	0.00193315	0.00879422	0.00285546	0.00443537	0.00162762
cg05575921	chr5	373378	N_Shore	AHRR	Body	4	-0.0174832	0.00287178	1.14381e-09	-0.019757	0.00525853	0.000171873	0.00845682	0.677848	9.31237	0.0254135	-0.0329389	0.00702486	-0.020394	0.0049904	-0.0210743	0.00765573	-0.00841171	0.00428993
cg24082526	chr19	49993125	S_Shore	RPL13AP5;SNORD33;SNORD35A;SNORD34;RPL13A;SNORD32A	Body;TSS1500;TSS1500;TSS1500;Body;TSS200	4	0.00638757	0.00161235	7.44375e-05	0.0063667	0.00169599	0.000174056	0.000874545	0	2.8454	0.416081	-0.00127892	0.00562081	0.00872845	0.00255791	0.00861676	0.00485154	0.00561575	0.0022848
cg17104738	chr4	1844724	S_Shore	LETM1	Body	4	-0.00123175	0.00032818	0.000174545	-0.00123175	0.00032818	0.000174545	0	0	1.5001	0.682248	0.000439181	0.00270707	-0.0013346	0.00188161	-0.00435976	0.00258739	-0.00119957	0.000329398
cg21710324	chr1	226069189	N_Shore	TMEM63A	5'UTR	4	-0.0042236	0.00102407	3.71813e-05	-0.00440734	0.00117437	0.000174767	0.000995549	0.223921	3.86558	0.276349	-0.00910809	0.00332181	-0.00383509	0.00148944	-0.00726131	0.00289756	-0.00260788	0.00161593
cg23627354	chr1	89459658	S_Shore	CCBL2;CCBL2;RBMXL1;RBMXL1	TSS1500;TSS1500;TSS1500;TSS1500	3	0.0239512	0.00621168	0.00011534	0.0241817	0.00644503	0.000175434	0.00258994	0	1.93867	0.379336	0.0274532	0.0109703	0.018165	0.00774803	0.0451959	0.0168643
cg18058230	chr3	171029779	OpenSea	TNIK;TNIK;TNIK;TNIK;TNIK;TNIK;TNIK;TNIK	Body;Body;Body;Body;Body;Body;Body;Body	4	-0.00638621	0.00141143	6.04981e-06	-0.00694759	0.00185208	0.000175961	0.00220989	0.35661	4.6628	0.198221	-0.0122098	0.00401215	-0.00496886	0.00221382	-0.0112691	0.00355489	-0.00424002	0.00221104
cg13169968	chr1	230563798	S_Shore			4	-0.0123129	0.00328856	0.000181001	-0.0123129	0.00328856	0.000181001	0	0	2.31476	0.509699	-0.0206307	0.00843381	-0.0155509	0.00542572	-0.0100331	0.0086501	-0.00705714	0.00503705

## Sheet: Table S3
ProbeID	Chromosome	Position	Relation to Island	UCSC Reference Gene Name	UCSC Referenc Gene Group	Number of Cohorts	All_Effect_Fixed	All_Effect_SE_Fixed	All_P_Fixed	All_Effect_Random	All_Effect_SE_Random	All_P_Random	All_tau	All_I2	All_Q	All_Het.P	beta_UCL_Female	SE_UCL_Female	beta_ABR_Female	SE_ABR_Female	beta_IOP_Female	SE_IOP_Female	beta_TOP_Female	SE_TOP_Female	beta_UCL_Male	SE_UCL_Male	beta_ABR_Male	SE_ABR_Male	beta_IOP_Male	SE_IOP_Male	beta_TOP_Male	SE_TOP_Male
cg02488934	chr1	156422580	N_Shelf			8	0.00665384	0.00105273	2.60663e-10	0.00665384	0.00105273	2.60663e-10	0	0	2.14641	0.951294	0.00521716	0.00495119	0.00374866	0.00311533	0.0105429	0.00395607	0.00742705	0.00208962	0.00858958	0.00422735	0.0062886	0.00213306	0.00793509	0.00383663	0.00627836	0.00216614
cg27541604	chr1	159046451	OpenSea	AIM2;AIM2	5'UTR;1stExon	8	0.00707826	0.00115084	7.72233e-10	0.00707826	0.00115084	7.72233e-10	0	0	6.69369	0.461454	0.00994056	0.00435419	0.00599635	0.00394361	0.00735863	0.00535919	0.00724946	0.00220725	0.0153285	0.00410082	0.00771358	0.00255067	0.00162751	0.00459768	0.00478756	0.00219755
cg18096987	chr3	11623873	OpenSea	VGLL4;VGLL4;VGLL4	Body;TSS200;Body	8	-0.00691748	0.00114672	1.6155e-09	-0.00692072	0.00115549	2.1061e-09	0.000329016	0	6.99854	0.429032	-0.00490342	0.00552866	-0.0103128	0.00354772	-0.016291	0.0050184	-0.00922817	0.00230255	-0.00356432	0.00503097	-0.00365323	0.002329	-0.00460873	0.00403737	-0.00635472	0.00218651
cg26547058	chr8	142243143	OpenSea			6	0.0122167	0.00189521	1.14759e-10	0.0124863	0.00214655	5.99442e-09	0.00222166	0.0778968	5.42239	0.366532	0.0122507	0.00557163	0.012112	0.00510176	0.0184801	0.00602616			0.008187	0.00462712	0.00927467	0.00298707	0.0203097	0.0042265
cg15852826	chr6	31528915	OpenSea			8	0.00565199	0.000999795	1.57531e-08	0.00565199	0.000999795	1.57531e-08	0	0	2.52979	0.924837	0.0070784	0.00423912	0.00632545	0.00356272	0.00545998	0.0048854	0.00478493	0.00193219	0.00968109	0.00405753	0.006873	0.00229105	0.00777629	0.00373015	0.00421111	0.00175303
cg02934509	chr1	1669413	N_Shore	SLC35E2	Body	4	0.00701894	0.0012484	1.88383e-08	0.00701894	0.0012484	1.88383e-08	0	0	2.38412	0.496598	0.00966908	0.00244339			0.00861421	0.00259584			0.00592088	0.00238223			0.00498078	0.00197591
cg06934654	chr16	89180742	OpenSea	ACSF3;ACSF3;ACSF3	Body;Body;Body	8	0.00419633	0.000756359	2.88852e-08	0.00419632	0.000756444	2.89904e-08	2.46412e-05	0	5.46151	0.603831	0.00923293	0.00361769	0.00153937	0.00260963	0.0100976	0.00407933	0.00426192	0.00138946	0.0019586	0.00361856	0.00448809	0.0015988	0.00105613	0.00325439	0.00432291	0.00135632
cg06800849	chr16	89180587	OpenSea	ACSF3;ACSF3;ACSF3	Body;Body;Body	8	0.00560404	0.00101307	3.1708e-08	0.00560404	0.00101307	3.1708e-08	0	0	4.66906	0.700276	0.00841401	0.00443501	0.00311206	0.00351555	0.0146749	0.00541899	0.00719978	0.00184371	0.00512539	0.00445642	0.00525302	0.00237757	0.00134109	0.00452112	0.00457571	0.00175637
cg25432300	chr5	90508265	OpenSea			8	0.00771316	0.00139654	3.33133e-08	0.00771316	0.00139654	3.33133e-08	0	0	2.0997	0.954116	0.012994	0.00531219	0.00602524	0.0049519	0.0128844	0.00695651	0.0083341	0.00284085	0.0073089	0.00453983	0.00840669	0.00297008	0.00646401	0.00454311	0.00577417	0.00276722
cg24069602	chr17	62045522	OpenSea	SCN4A	Body	8	0.00514606	0.000932274	3.39192e-08	0.00514606	0.000932274	3.39192e-08	0	0	4.28178	0.746809	0.00327183	0.00376507	0.00420771	0.00333989	0.00364802	0.00449098	0.00533953	0.00178	0.00383532	0.00377823	0.00891147	0.00217173	0.00668102	0.00303017	0.00355078	0.00170206
cg04780563	chr10	35748463	OpenSea	CCNY;CCNY	Body;5'UTR	6	-0.0111314	0.00178519	4.50571e-10	-0.0109652	0.00200534	4.55144e-08	0.00199099	0.233768	6.52544	0.258392	-0.00572778	0.00495725	-0.0109312	0.00409965	-0.0229398	0.00643742			-0.00578593	0.00431194	-0.0143695	0.00282098	-0.00883696	0.00477092
cg27207470	chr11	111848326	Island	DIXDC1;DIXDC1;DIXDC1	1stExon;5'UTR;Body	6	0.0131939	0.00243326	5.8827e-08	0.0131939	0.00243326	5.8827e-08	0	0	2.10059	0.835058	0.0199194	0.00584837	0.014323	0.00561905	0.016057	0.00808698			0.0106682	0.0058135	0.00998672	0.00421462	0.0124999	0.0062797
cg01973676	chr7	101596404	OpenSea	CUX1;CUX1;CUX1	Body;Body;Body	8	0.00786645	0.00146172	7.38037e-08	0.00786645	0.00146172	7.38037e-08	0	0	6.0968	0.528493	0.0136839	0.00661883	0.0162442	0.00473431	0.00910086	0.00673336	0.00759399	0.00279468	0.00789481	0.00613914	0.0045693	0.0033255	-0.000248481	0.00597042	0.00784281	0.002596
cg24107852	chr7	127960508	OpenSea	RBM28;RBM28	Body;Body	6	-0.00761248	0.00143152	1.05055e-07	-0.00761248	0.00143152	1.05055e-07	0	0	4.56506	0.471226	-0.00711163	0.00416635	-0.00390908	0.00336442	-0.0126721	0.00412026			-0.0140062	0.00437643	-0.00650381	0.00217039	-0.00767427	0.00353656
cg14327296	chr14	101051064	N_Shelf			8	0.00465396	0.000875373	1.05758e-07	0.00465396	0.000875373	1.05758e-07	0	0	6.17664	0.519283	0.00826051	0.00437883	0.00777727	0.00282488	0.00650086	0.004526	0.00276843	0.00165229	0.000495606	0.00364322	0.00403708	0.00187736	0.00896809	0.00307235	0.00506915	0.00164219
cg07600998	chr1	147146108	S_Shelf			8	0.00464802	0.000796424	5.34341e-09	0.00467257	0.000885646	1.32112e-07	0.000938855	0	6.91486	0.437799	0.00258498	0.00317105	0.00771901	0.00242699	0.0071428	0.00370015	0.00517972	0.00154078	0.00696699	0.00311866	0.00562433	0.00156785	0.00254634	0.00283208	0.00150954	0.00173274
cg19507068	chr7	79764176	Island	GNAI1;GNAI1	1stExon;5'UTR	8	0.00515566	0.000978197	1.35996e-07	0.00515566	0.000978197	1.35996e-07	0	0	2.15248	0.950921	0.00676591	0.00272492	0.00730334	0.0030459	0.00685239	0.0036896	0.00460276	0.00203004	0.00316225	0.00362146	0.00597263	0.00229534	0.00648164	0.00498059	0.00364043	0.00190428
cg02419321	chr12	54811762	N_Shore	ITGA5	Body	8	-0.00577556	0.0010764	8.06622e-08	-0.00577645	0.00109739	1.4109e-07	0.0005105	0.165572	8.38898	0.299546	0.00619456	0.0061802	-0.00372693	0.00276057	-0.0142459	0.00374329	-0.00435246	0.00258889	-0.00609629	0.00464201	-0.00602989	0.00196244	-0.00800516	0.00353807	-0.00610281	0.0022913
cg01678084	chr15	67022087	OpenSea	SMAD6;SMAD6;SMAD6	Body;Body;Body	8	0.00525475	0.00100091	1.52133e-07	0.00525475	0.00100091	1.52133e-07	0	0	6.36666	0.497646	0.00960847	0.0045296	0.00641435	0.00334026	0.00907506	0.00457802	0.0060549	0.00201538	0.00123876	0.00380031	0.00369319	0.00204245	0.0118187	0.0036848	0.00391543	0.00189536
cg01142735	chr8	103932076	OpenSea			8	0.00510949	0.000973922	1.55183e-07	0.00510949	0.000973922	1.55183e-07	0	0	4.67864	0.699113	0.00597157	0.00367776	0.0105081	0.00322648	-9.94768e-05	0.00446648	0.00500086	0.00207629	0.00493961	0.00323645	0.0043301	0.00182717	0.00192509	0.0033228	0.00577272	0.00213134
cg24935896	chr1	201431492	OpenSea			8	0.00538834	0.00102703	1.5497e-07	0.00538839	0.00102737	1.56435e-07	6.32535e-05	0	6.56929	0.475057	-0.00218771	0.0045183	0.00823187	0.00312375	0.00573003	0.00470418	0.00421897	0.0021359	0.00756782	0.00405875	0.00312781	0.00214914	0.00914324	0.00340379	0.00688874	0.00195944
cg18919106	chr8	132918665	S_Shore	EFR3A	Body	8	-0.00629166	0.00108708	7.13596e-09	-0.00653158	0.00124744	1.64094e-07	0.00154003	0.22757	9.0623	0.248214	-0.0147634	0.0041392	-0.00869667	0.00284095	-0.0123532	0.00427723	-0.00231052	0.00261406	-0.00603905	0.0037293	-0.00467277	0.00198484	-0.00802072	0.00406461	-0.00507501	0.00250381
cg13675015	chr6	43217925	S_Shelf	TTBK1	Body	8	0.00554402	0.00106796	2.08916e-07	0.00554402	0.00106796	2.08916e-07	0	0	2.10033	0.954079	0.00716261	0.00422228	0.0043164	0.00378408	0.00873755	0.00503663	0.00620854	0.00199104	0.00118001	0.00405704	0.00534738	0.00264957	0.00788266	0.00384555	0.00531259	0.00192458
cg09022230	chr7	5457225	N_Shore	TNRC18	Body	8	-0.00806718	0.00155697	2.20319e-07	-0.00806718	0.00155697	2.20319e-07	0	0	3.56711	0.828067	-0.0125093	0.00619429	-0.00827149	0.00597071	-0.0092883	0.00853424	-0.0102561	0.00284163	-0.0128474	0.00564126	-0.00433282	0.0035993	-0.0100566	0.00624983	-0.00534006	0.00284403
cg20994118	chr1	209780966	OpenSea	CAMK1G	Body	8	0.00690289	0.00133637	2.39937e-07	0.00690289	0.00133637	2.39937e-07	0	0	5.2285	0.632101	0.00819361	0.00450322	0.00671875	0.00370415	0.00581177	0.00413869	0.00805148	0.00394627	0.0132358	0.00392961	0.00606634	0.0025493	0.000757308	0.0035272	0.00760273	0.00352764
cg17166812	chr1	161169574	N_Shelf	NDUFS2;ADAMTS4	5'UTR;TSS1500	8	0.00434834	0.000843048	2.49766e-07	0.00434834	0.000843048	2.49766e-07	0	0	4.66732	0.700487	0.00553576	0.00334481	0.00298178	0.00230778	0.00325567	0.00302065	0.00768186	0.00192666	0.000585764	0.00355079	0.0041575	0.00157908	0.00485116	0.00246948	0.00332332	0.00195938
cg03753191	chr13	43566902	S_Shore	EPSTI1;EPSTI1	TSS1500;TSS1500	8	0.00517818	0.000967502	8.69348e-08	0.0052478	0.00102213	2.83373e-07	0.000737957	0.201557	8.76706	0.269816	0.00904336	0.0049001	0.00416556	0.00332153	0.00833904	0.00418982	0.00454957	0.00200583	0.00558069	0.00480475	0.00225741	0.00200945	0.0141341	0.003394	0.00517489	0.0016742
cg22858169	chr7	128832645	S_Shelf	SMO	Body	8	0.00348731	0.000657388	1.12804e-07	0.00349517	0.000683696	3.18473e-07	0.000435633	0	6.63699	0.467629	0.00430383	0.00267468	0.00169105	0.00224057	0.00709244	0.003253	0.00351327	0.00127918	-0.000722389	0.00264152	0.0042627	0.00147118	0.00717135	0.00226015	0.00305399	0.00120656
cg13555415	chr9	134454249	OpenSea	RAPGEF1;RAPGEF1	3'UTR;3'UTR	8	0.00287308	0.000564198	3.53689e-07	0.00287308	0.000564198	3.53689e-07	0	0	1.32506	0.987757	0.0020138	0.0030446	0.00397208	0.00275137	0.00287507	0.00373063	0.00237045	0.000871846	0.00413481	0.00338878	0.00435665	0.00201571	0.00491684	0.00458352	0.00294933	0.000849872
cg01955153	chr16	50769852	OpenSea			8	0.0035116	0.000692307	3.93007e-07	0.0035116	0.000692307	3.93007e-07	0	0	5.44178	0.606216	0.00168358	0.00317504	0.00567025	0.00206497	0.00611133	0.00305429	0.00242668	0.00133636	0.00523928	0.00289072	0.00435748	0.00138543	0.00604938	0.00263539	0.00180981	0.00141011
cg05575921	chr5	373378	N_Shore	AHRR	Body	8	-0.016836	0.00211677	1.81126e-15	-0.0193896	0.00385068	4.76912e-07	0.00865439	0.675564	21.5759	0.003005	-0.0340473	0.00650286	-0.0166744	0.00694592	-0.023087	0.00888995	-0.00654813	0.0042456	-0.0329389	0.00702486	-0.020394	0.0049904	-0.0210743	0.00765573	-0.00841171	0.00428993
cg16277071	chr17	75537317	OpenSea			8	0.00570459	0.00113876	5.4575e-07	0.00570477	0.00113928	5.519e-07	7.88579e-05	0	6.32088	0.502821	0.00343437	0.00513295	0.007277	0.00373405	0.0138165	0.00487809	0.00437995	0.00220241	0.00258778	0.00462615	0.00945086	0.00247911	0.000789178	0.0046142	0.00466763	0.00208757
cg00830621	chr16	18799106	N_Shelf	RPS15A;RPS15A	Body;Body	6	0.00679442	0.00135775	5.6102e-07	0.00679442	0.00135775	5.6102e-07	0	0	1.6863	0.890621	0.00756185	0.0038241	0.00642681	0.00319341	0.00787167	0.00402839			0.0109104	0.00387297	0.00538025	0.00204744	0.00637137	0.00367863
cg03172931	chr19	8677774	S_Shelf			8	-0.00555062	0.00111139	5.90543e-07	-0.00555062	0.00111139	5.90543e-07	0	0	3.29576	0.856361	-0.0109831	0.00409127	-0.00267433	0.003702	-0.00686766	0.00542728	-0.00686739	0.00224064	-0.00271756	0.00363013	-0.00516364	0.00248443	-0.00543121	0.00410403	-0.00494339	0.00213006
cg20816889	chr11	111848087	Island	DIXDC1;DIXDC1;DIXDC1	1stExon;5'UTR;Body	8	0.00272504	0.000539588	4.4128e-07	0.00273206	0.000548464	6.31578e-07	0.000194836	0	5.42427	0.608334	0.0077535	0.00315075	0.00339928	0.00217312	0.000211663	0.00240437	0.00294701	0.000853777	0.00381219	0.00219946	0.00202671	0.00173748	0.00527224	0.00237586	0.00194039	0.000922306
cg01963224	chr14	71791671	S_Shelf			8	-0.00443211	0.000873557	3.90273e-07	-0.00443179	0.000891167	6.59169e-07	0.00042283	0.00179207	7.01257	0.427573	0.00123682	0.0035023	-0.00434653	0.00227176	-0.00784137	0.00363842	-0.00149331	0.00205158	-0.00787293	0.00362141	-0.00445421	0.00155718	-0.00539344	0.00305749	-0.00653744	0.00197157
cg26579578	chr11	69707303	S_Shore			6	0.00510094	0.00102805	6.98632e-07	0.00510094	0.00102805	6.98632e-07	0	0	2.01233	0.847436	0.00694427	0.00332452	0.00342912	0.00245518	0.00514747	0.00366428			0.00667648	0.00290536	0.00565243	0.00144985	0.00212537	0.00277891
cg18016128	chr17	16396497	S_Shore	C17orf76;C17orf76	TSS1500;TSS1500	8	0.00476317	0.000962303	7.43041e-07	0.00476317	0.000962303	7.43041e-07	0	0	3.20797	0.86512	0.0039277	0.00389415	0.000611083	0.00342213	-0.00175799	0.00560033	0.00633592	0.00187564	0.00449678	0.0034872	0.00553023	0.00213946	0.00420883	0.00344002	0.00501942	0.00175381
cg04876835	chr1	57111099	Island	PRKAA2	1stExon	6	0.00712105	0.00144233	7.92649e-07	0.00712105	0.00144233	7.92649e-07	0	0	2.38009	0.794435	0.00796266	0.00317595	0.0106167	0.00357678	0.00925081	0.00324512			0.00425936	0.00428392	0.00567968	0.00254722	0.00443195	0.00396324
cg00014104	chr22	22220367	N_Shore	MAPK1;MAPK1	Body;Body	8	-0.00692072	0.00140367	8.20459e-07	-0.00692072	0.00140367	8.20459e-07	0	0	2.88656	0.895295	-0.0017778	0.00542903	-0.00842723	0.0049053	-0.00297751	0.00615452	-0.00567073	0.00285012	-0.012344	0.0045476	-0.00663358	0.00303513	-0.00892673	0.0052842	-0.00702213	0.00269817
cg10633609	chr4	190705649	OpenSea			8	0.00496997	0.00101652	1.01253e-06	0.00496997	0.00101652	1.01253e-06	0	0	4.58992	0.709864	-0.00119683	0.00441646	0.00509359	0.00338709	0.00866207	0.00413968	0.00688942	0.00210725	0.00829711	0.00390488	0.00306762	0.00237635	0.00376537	0.00381131	0.00470928	0.00175363
cg19103429	chr7	92460784	N_Shore	CDK6;CDK6	Body;Body	6	-0.00858217	0.00175982	1.07856e-06	-0.00858217	0.00175982	1.07856e-06	0	0	1.8075	0.875087	-0.0145497	0.00580934	-0.00785479	0.00388385	-0.00507459	0.00539192			-0.00721611	0.00541539	-0.00782308	0.00258074	-0.0116552	0.00460095
cg00799387	chr3	32827142	S_Shelf			4	0.0166995	0.00342537	1.08682e-06	0.0166995	0.00342537	1.08682e-06	0	0	1.63135	0.652302	0.0171243	0.00639997			0.0209139	0.00680031			0.0105384	0.00610377			0.0207387	0.00627246
cg01556466	chr7	31146260	OpenSea	ADCYAP1R1	Body	8	0.00513044	0.0010524	1.08825e-06	0.00513044	0.0010524	1.08825e-06	0	0	4.9513	0.665906	0.000162135	0.00499957	0.0105899	0.00391128	0.000838426	0.004356	0.00524091	0.00202991	0.00953714	0.00509071	0.00465055	0.00244841	0.00775829	0.00365918	0.00433672	0.00179461
cg02656560	chr17	19967600	OpenSea			6	0.00612616	0.00125733	1.10275e-06	0.00612616	0.00125733	1.10275e-06	0	0	2.86901	0.720173	0.0113945	0.00390519	0.00592447	0.00289943	0.0054452	0.00347167			0.00884907	0.00386836	0.00458747	0.00189111	0.00553526	0.00318019
cg02716792	chr16	81480551	S_Shore	CMIP	Body	8	-0.00416752	0.000705559	3.49058e-09	-0.004449	0.000913264	1.10732e-06	0.00143054	0.336176	10.545	0.159736	-0.00532832	0.0032845	-0.00394247	0.00207982	-0.011023	0.00281176	-0.00138473	0.00143368	-0.00340721	0.00301117	-0.00359393	0.00142228	-0.00859727	0.00258891	-0.0048047	0.00139093
cg12269535	chr6	43142014	Island	SRF	Body	8	-0.00753724	0.00154811	1.12346e-06	-0.00753724	0.00154811	1.12346e-06	0	0	5.05361	0.653421	-0.017242	0.00611511	-0.0051077	0.0051258	-0.00983785	0.00700879	-0.00954665	0.00313955	-0.0078678	0.00512096	-0.00749141	0.00345902	-0.000344713	0.00488063	-0.0059524	0.00304949
cg10575089	chr17	56606542	N_Shelf	SEPT4;SEPT4;SEPT4;SEPT4	Body;Body;5'UTR;1stExon	8	0.00460046	0.000945503	1.14095e-06	0.00460313	0.000948644	1.22023e-06	0.000192937	0.0389385	7.28361	0.39996	0.00601957	0.00330385	0.00873004	0.00296695	0.00175834	0.00351207	0.00377784	0.00231235	0.00918989	0.00277833	0.00298704	0.00173723	0.000598815	0.00328157	0.00437579	0.0022114
cg02615735	chr6	31648276	N_Shore	LY6G5C	TSS200	8	-0.00770675	0.00159133	1.27919e-06	-0.00770675	0.00159133	1.27919e-06	0	0	3.29786	0.856149	-0.00627184	0.00493253	-0.0115954	0.00439591	-0.002567	0.0051536	-0.00682006	0.004305	-0.0113534	0.00434157	-0.00878392	0.00313253	-0.00657802	0.00478961	-0.00352456	0.00430089
cg02577773	chr2	208027870	N_Shelf	KLF7	Body	8	-0.00893195	0.00184488	1.28875e-06	-0.00893195	0.00184488	1.28875e-06	0	0	5.03106	0.656173	-0.00759744	0.00658222	-0.017724	0.00651647	-0.00132787	0.00855717	-0.00847585	0.00394286	-0.0111971	0.00552289	-0.00992034	0.00378515	0.00360789	0.00730547	-0.00847966	0.00365914
cg13904970	chr5	123987667	Island	ZNF608	Body	8	0.00606516	0.00124704	1.15242e-06	0.0060725	0.00125453	1.29547e-06	0.00033183	0.0866875	7.66441	0.363114	0.00709318	0.0036636	0.00162465	0.00374891	0.0184797	0.00588701	0.00559714	0.00257507	0.00929883	0.00437449	0.00921108	0.00281593	0.0042377	0.00612095	0.00340266	0.00243701
cg23996071	chr1	60280809	Island	HOOK1	1stExon	8	0.00457004	0.000944651	1.31278e-06	0.00457004	0.000944651	1.31278e-06	0	0	2.00229	0.959713	0.00187051	0.00412844	0.00402145	0.00305544	0.00459401	0.00396299	0.00464097	0.00194431	0.00330437	0.00342443	0.00661437	0.00193285	0.00614111	0.00350733	0.00362871	0.00182473
cg10848272	chr14	70653719	N_Shore	SLC8A3;SLC8A3;SLC8A3;SLC8A3	5'UTR;5'UTR;5'UTR;5'UTR	8	0.0022368	0.000462547	1.32599e-06	0.0022368	0.000462547	1.32599e-06	0	0	3.86575	0.795105	0.0014199	0.00174591	0.0042914	0.00178304	0.0011497	0.00250243	0.00279251	0.0007686	0.000456466	0.00177171	0.00263117	0.00153126	0.000245586	0.00205056	0.00207122	0.000791189
cg15842722	chr20	23499644	OpenSea	CSTT	TSS200	8	0.00433041	0.000896614	1.36715e-06	0.00433041	0.000896614	1.36715e-06	0	0	3.97173	0.783028	0.00452961	0.00400299	0.00469315	0.00315615	0.0079043	0.00386449	0.00337417	0.00164048	0.00686241	0.00379009	0.00539914	0.00205728	0.0085886	0.00334164	0.00270841	0.00165066
cg12524168	chr5	76028910	OpenSea	F2R	Body	8	0.0047527	0.00098769	1.49471e-06	0.0047527	0.00098769	1.49471e-06	0	0	6.3621	0.498161	0.0106292	0.00430808	0.00420479	0.0036243	0.00407707	0.00437245	0.0030546	0.00189759	0.0108139	0.00348574	0.00568938	0.00211098	0.00401589	0.00391117	0.00326496	0.00185871
cg25165932	chr12	109025846	OpenSea	SELPLG	5'UTR	8	-0.00165054	0.000343444	1.54102e-06	-0.00165054	0.000343444	1.54102e-06	0	0	1.87015	0.966677	-0.00299306	0.00193311	-0.000734753	0.00110335	-0.000992482	0.0018331	-0.00210557	0.00064948	-0.00109871	0.00135647	-0.00164517	0.000741613	-0.00174845	0.00143365	-0.00153964	0.000616535
cg06501716	chr22	19436948	S_Shore	C22orf39;C22orf39	TSS1500;TSS1500	8	0.00526941	0.00100509	1.58223e-07	0.00528446	0.00110318	1.66599e-06	0.00105179	0.00136898	7.0096	0.427881	-0.00218162	0.00446643	0.00406189	0.00365534	0.0100797	0.0040907	0.00343375	0.001816	0.00329914	0.00409097	0.00710552	0.00230512	0.00978237	0.00371026	0.00642472	0.00189409
cg26189021	chr1	110757770	S_Shelf	KCNC4;KCNC4;KCNC4	Body;Body;Body	8	0.00522149	0.00109105	1.70367e-06	0.00522149	0.00109105	1.70367e-06	0	0	2.30126	0.941305	0.0117079	0.00529339	0.00758745	0.0036923	0.00604693	0.00501795	0.00413522	0.00198047	0.00568917	0.00487266	0.00556877	0.0023541	0.00454762	0.00430456	0.00445801	0.00204238
cg07379893	chr1	159902859	S_Shelf	IGSF9;IGSF9	Body;Body	8	0.00386243	0.000808484	1.77598e-06	0.00386243	0.000808484	1.77598e-06	0	0	6.31154	0.503879	0.00938112	0.00359582	-0.000795191	0.00282038	0.00596769	0.00390747	0.00455409	0.00153032	0.00444179	0.00327711	0.00348419	0.00182655	0.00679723	0.00318183	0.00310817	0.00143838
cg03295554	chr11	128395450	S_Shelf	ETS1	Body	8	-0.0116425	0.00232239	5.35413e-07	-0.0119047	0.00249271	1.78996e-06	0.00216095	0.205339	8.80879	0.266678	-0.028322	0.00832546	-0.0100114	0.00810677	-0.030759	0.0117056	-0.00793269	0.00472433	-0.0170475	0.00760299	-0.0137492	0.00519556	-0.00292434	0.00917492	-0.00685014	0.00430485
cg07970325	chr6	106497542	OpenSea			8	0.00434965	0.000911974	1.84691e-06	0.00434965	0.000911974	1.84691e-06	0	0	2.50175	0.926966	0.00904844	0.00431314	0.00335364	0.00330486	0.0049913	0.00437666	0.00261551	0.00172018	0.00418443	0.00355051	0.00550621	0.00202082	0.00408514	0.0036909	0.00481381	0.00162291
cg01717524	chr1	120204880	OpenSea			8	0.00490042	0.0010171	1.44993e-06	0.0049076	0.00103172	1.96752e-06	0.000417192	0	6.42308	0.491305	0.0061372	0.00393447	0.00662903	0.00320696	0.0122177	0.00466669	0.00727022	0.00204411	0.00526797	0.00359425	0.00428614	0.00209324	0.000277277	0.0037048	0.00216506	0.00207148
cg00733115	chr6	37105406	OpenSea			8	0.00389724	0.000819508	1.97876e-06	0.00389724	0.000819508	1.97876e-06	0	0	4.99115	0.661043	0.00204382	0.0032785	0.00549008	0.00280698	0.00095238	0.00396928	0.00322252	0.00161161	0.00998446	0.00317934	0.00311492	0.00184027	0.00415752	0.00300848	0.00383689	0.00148423
cg25414605	chr11	67182672	N_Shore	ATPGD1;ATPGD1	TSS1500;TSS1500	8	-0.00532573	0.00112097	2.02396e-06	-0.00532573	0.00112097	2.02396e-06	0	0	5.03362	0.655861	-0.00556198	0.00428989	-0.00795751	0.00311954	-0.00783052	0.00472891	-0.00436845	0.00252795	-0.0074983	0.00386895	-0.00366886	0.0022596	-0.0114206	0.00366073	-0.00265835	0.00236831
cg02743674	chr11	2433468	N_Shore	TRPM5	Body	8	0.00415297	0.00087569	2.1108e-06	0.00415297	0.00087569	2.1108e-06	0	0	5.80763	0.562382	0.00373281	0.00391574	0.00743381	0.00278889	0.00195334	0.00371879	0.0054295	0.00185482	0.00804765	0.00338381	0.00286799	0.00168483	-0.000354672	0.00284621	0.00397441	0.00177871
cg12011479	chr19	51873045	S_Shore	CLDND2	TSS1500	8	-0.00418501	0.000805529	2.04332e-07	-0.00425179	0.000897194	2.14792e-06	0.000971131	0	6.16119	0.521059	-0.00256507	0.0029032	-0.00851072	0.00267158	-0.00336082	0.00374131	-0.00473528	0.00170472	-0.0047297	0.00270406	-0.00518299	0.0016446	-0.00494249	0.00300777	-0.0014113	0.00159367
cg17130481	chr20	853509	OpenSea	ANGPT4	3'UTR	8	0.00389585	0.000823207	2.21741e-06	0.00389585	0.000823207	2.21741e-06	0	0	2.10059	0.954063	0.00653968	0.00367324	0.00404943	0.0029157	0.00599018	0.00444767	0.00479085	0.001612	0.000932627	0.00356109	0.00261384	0.00178341	0.00429891	0.00274229	0.00388355	0.00147121
cg05307752	chr2	144462886	OpenSea	ARHGAP15	Body	8	0.00849825	0.00172266	8.08854e-07	0.00852583	0.00180631	2.35802e-06	0.00136379	0	6.6787	0.463082	0.0085851	0.00682318	0.00918389	0.00536494	0.00295033	0.00616946	0.00378132	0.00371881	0.0174833	0.00574358	0.0115003	0.00329094	0.0131735	0.00568855	0.00485562	0.00395238
cg24587175	chr10	105670608	OpenSea	OBFC1	Body	8	-0.00401643	0.000851381	2.38707e-06	-0.00401643	0.000851381	2.38707e-06	0	0	3.94837	0.785704	-0.00186329	0.004064	-0.00721975	0.00337242	-0.00493737	0.0034478	-0.00272731	0.00148167	-0.00688017	0.00370259	-0.00218458	0.00215408	-0.0076844	0.0036352	-0.00452362	0.00147737
cg06321596	chr16	17562960	OpenSea	XYLT1	Body	8	-0.00921458	0.00195437	2.41865e-06	-0.00921458	0.00195437	2.41865e-06	0	0	1.18903	0.991177	-0.0118201	0.00698161	-0.0135422	0.00539197	-0.00698787	0.00748891	-0.00820553	0.00450528	-0.00651869	0.00671509	-0.00766655	0.00403498	-0.00845688	0.00604858	-0.00974837	0.00424518
cg08587504	chr20	34639686	S_Shore	LOC647979	TSS1500	8	0.00439941	0.000897064	9.37934e-07	0.00440142	0.000933688	2.42885e-06	0.000600025	0	4.55552	0.714022	0.00316097	0.00345251	0.00568972	0.00300468	-0.000338952	0.00468318	0.00644772	0.00173564	0.00291907	0.00321572	0.00583453	0.00202212	0.00565683	0.00370074	0.00235695	0.00165182
cg11621113	chr19	12776725	N_Shore	MORG1;MORG1;MAN2B1	TSS1500;TSS1500;Body	8	-0.00548982	0.00112089	9.69587e-07	-0.00555437	0.00118079	2.55196e-06	0.000849532	0	5.55054	0.593095	-0.00979035	0.0053998	-0.00590977	0.00397077	-0.00212301	0.00535784	-0.00572233	0.00216363	-0.00453968	0.00463619	-0.0072797	0.00236465	-0.0114748	0.00384732	-0.00228098	0.00206824
cg08029287	chr4	1503238	N_Shelf			8	0.00483188	0.00102438	2.39462e-06	0.0048347	0.00103023	2.69433e-06	0.000259667	0	5.07598	0.650692	-0.000721572	0.00403217	0.0070486	0.00354576	0.0117143	0.00397105	0.00395962	0.00205045	0.00327254	0.00384581	0.00549062	0.00229763	0.00679197	0.00364063	0.00452374	0.00191718
cg15169121	chr2	177534417	OpenSea			8	0.00807149	0.00172053	2.71489e-06	0.00807149	0.00172053	2.71489e-06	0	0	6.28149	0.507292	0.00910413	0.00624073	0.0117721	0.00520483	0.00637897	0.00693638	0.0124981	0.00367964	-0.00384729	0.00608322	0.00823484	0.00342621	0.0106916	0.00554249	0.00542676	0.00377673
cg14426167	chr17	27972099	OpenSea	SSH2	Body	8	0.00518423	0.00110636	2.78783e-06	0.00518423	0.00110636	2.78783e-06	0	0	5.07401	0.650932	0.00484257	0.00489129	0.00399456	0.00341277	0.00499542	0.00547217	0.00328344	0.00227057	-0.000212501	0.00406942	0.00710095	0.00229631	0.0109761	0.00380261	0.00591919	0.00213248
cg24385652	chr10	50329828	OpenSea			8	0.00436913	0.00093311	2.83623e-06	0.00436913	0.00093311	2.83623e-06	0	0	3.50484	0.834713	0.00735339	0.00413838	0.00468303	0.00345785	0.00216125	0.00500069	0.00374086	0.00190283	0.00522575	0.00354769	0.00648418	0.00182662	-2.77073e-05	0.00339105	0.00352417	0.00173594
cg05072547	chr16	19883549	OpenSea	GPRC5B	Body	8	0.00464537	0.000981821	2.22996e-06	0.00466746	0.000997295	2.86707e-06	0.000401078	0.0998298	7.77631	0.352732	0.0102775	0.00418514	0.00714989	0.00320299	0.0138749	0.00423778	0.00251486	0.00196055	0.00213111	0.00414587	0.0053772	0.00220835	0.00280119	0.00360566	0.00380857	0.00175338
cg15278374	chr12	131576088	S_Shelf	GPR133	Body	8	0.00552225	0.00118025	2.88459e-06	0.00552225	0.00118025	2.88459e-06	0	0	1.70301	0.974439	0.00685249	0.00507875	0.0101778	0.00431771	0.00661618	0.00567394	0.00527849	0.00230695	0.00421824	0.00469811	0.00482518	0.00254079	0.00296334	0.00382583	0.00575689	0.00219236
cg14780632	chr11	65816521	Island	GAL3ST3;GAL3ST3	5'UTR;1stExon	8	0.00361161	0.00075535	1.74102e-06	0.00359622	0.000771372	3.12993e-06	0.000290356	0	5.90571	0.550801	0.00688274	0.00415162	0.00379104	0.00334157	-0.00577652	0.00440601	0.00310427	0.00119223	0.0010736	0.00397618	0.00303419	0.00234909	0.00103251	0.00439642	0.0049464	0.00119413
cg02980023	chr3	52558373	N_Shore	STAB1	3'UTR	8	0.00347683	0.000746938	3.24333e-06	0.00347683	0.000746938	3.24333e-06	0	0	5.7631	0.567667	0.00485773	0.00373629	0.00432961	0.00265798	0.00655454	0.00346632	0.0045278	0.00131695	0.0052237	0.00368232	0.000814878	0.00170885	-0.000682613	0.00268845	0.00394894	0.00136255
cg18686527	chr17	27044685	Island	RAB34;RAB34;RAB34;RAB34;RAB34;RAB34;RAB34;RAB34;RAB34	Body;Body;5'UTR;Body;5'UTR;1stExon;Body;Body;1stExon	8	0.00479688	0.00103107	3.28168e-06	0.00479688	0.00103107	3.28168e-06	0	0	3.03142	0.88208	0.00589645	0.00384169	0.00364578	0.00278082	0.000576438	0.00501221	0.0057321	0.00199702	0.00305474	0.00395531	0.00529954	0.00234128	0.0107461	0.00423652	0.0038045	0.00206109
cg21934230	chr1	228202608	OpenSea	WNT3A	Body	8	-0.00906359	0.00194522	3.17114e-06	-0.00906486	0.00195018	3.34802e-06	0.000359576	0.154482	8.27895	0.30864	-0.0133623	0.00601823	-0.00405933	0.00580543	-0.019182	0.00714071	-0.00331249	0.00453402	-0.017255	0.00563158	-0.00840607	0.00396423	0.00230266	0.007329	-0.0106904	0.00444477
cg13709487	chr3	100322493	OpenSea			8	0.00717239	0.00154614	3.50278e-06	0.00717239	0.00154614	3.50278e-06	0	0	5.2069	0.63473	0.0114271	0.00696248	0.00314983	0.00507686	0.0146206	0.00711518	0.00423601	0.0030452	0.00477627	0.00569825	0.0119067	0.00323478	0.0104454	0.00569353	0.00580978	0.00296505
cg01439754	chr2	112293267	OpenSea			8	0.00556318	0.00120039	3.57857e-06	0.00556318	0.00120039	3.57857e-06	0	0.0265774	7.19112	0.409256	0.00148289	0.00423469	0.00167042	0.00438092	0.00227116	0.00592665	0.00334614	0.0023974	0.0133393	0.00394503	0.00645231	0.00263687	0.00298524	0.00567933	0.00716835	0.00220826
cg06872964	chr1	79085250	OpenSea	IFI44L	TSS1500	6	0.0126197	0.00266726	2.23072e-06	0.0126984	0.00274282	3.66202e-06	0.00137167	0	4.0131	0.547531	0.0134047	0.00779477	0.012878	0.00876249	0.0118214	0.00724618			0.0105195	0.00629162	0.00859668	0.00417904	0.024124	0.0059607
cg12167830	chr1	57111108	Island	PRKAA2	1stExon	8	0.00220559	0.000369548	2.39666e-09	0.00261875	0.0005665	3.7879e-06	0.000732821	0.423617	12.1447	0.0958998	0.00607081	0.00218515	0.00898841	0.00267203	0.00483681	0.00235717	0.00215571	0.000515577	0.00314769	0.00354172	0.00398255	0.00229195	0.00165479	0.00291739	0.00153242	0.000554889
cg15108641	chr10	99263320	S_Shelf	UBTD1	Body	8	0.00620529	0.00134411	3.89991e-06	0.00620529	0.00134411	3.89991e-06	0	0	2.86128	0.897532	0.00553839	0.00614584	0.00621435	0.00422714	0.0106426	0.00534168	0.00345441	0.00244515	0.00858977	0.00620021	0.00595699	0.00301088	0.0113381	0.00502222	0.00723941	0.00260232
cg25213452	chr1	206630385	OpenSea	SRGAP2;SRGAP2	Body;Body	8	0.00495838	0.00107416	3.91132e-06	0.00495838	0.00107416	3.91132e-06	0	0.0157149	7.11176	0.417337	0.0120338	0.00444867	-0.00168513	0.00367373	0.00251219	0.00569155	0.00709967	0.0022184	0.00593176	0.00392757	0.00353957	0.00240931	0.00268027	0.00410377	0.00529819	0.00186181
cg20831413	chr11	72460551	N_Shelf	ARAP1	5'UTR	8	0.00760085	0.00164778	3.97325e-06	0.00760085	0.00164778	3.97325e-06	0	0	4.74614	0.690911	0.00811	0.00717003	0.00511356	0.0051652	0.0212612	0.00641774	0.00450781	0.00349448	0.00818349	0.00594758	0.0092775	0.0029641	0.00663223	0.00614978	0.00640885	0.0036756
cg26785702	chr11	118846877	S_Shelf	FOXR1	Body	8	0.00491614	0.00106699	4.07567e-06	0.00491614	0.00106699	4.07567e-06	0	0	2.46369	0.929806	0.00521643	0.00462688	0.00792953	0.00385118	0.00630494	0.0051954	0.00356627	0.00208252	0.010048	0.0046296	0.00491418	0.00224378	0.00308843	0.00370644	0.0046626	0.00195002
cg07708016	chr15	30511386	N_Shelf			4	0.0122107	0.00265086	4.09885e-06	0.0122107	0.00265086	4.09885e-06	0	0	1.38905	0.708104	0.00723118	0.00498958			0.0159029	0.00720877			0.0142141	0.00407616			0.0125923	0.00501042
cg00489660	chr11	57089821	N_Shore	TNKS1BP1	5'UTR	8	0.00453096	0.000974142	3.29969e-06	0.00453526	0.000984873	4.12631e-06	0.000347237	0.0851494	7.65152	0.364322	0.000155591	0.00359163	0.00638894	0.00339157	0.00823772	0.00478047	0.00225972	0.00190646	0.00212232	0.00309833	0.00477006	0.00222565	0.0112877	0.00348883	0.00605063	0.00189204
cg27343325	chr20	3649247	N_Shelf	ADAM33;ADAM33	3'UTR;3'UTR	8	0.00381713	0.000830383	4.28971e-06	0.00381713	0.000830383	4.28971e-06	0	0	5.00309	0.659586	0.00326954	0.00331898	0.00474794	0.00265174	0.00125771	0.00459556	0.00231403	0.00160147	0.00070255	0.00323397	0.00437273	0.0018183	0.00945778	0.00309308	0.00446563	0.00156288
cg11231631	chr11	60553755	OpenSea	MS4A10	5'UTR	8	0.00408139	0.000891842	4.73139e-06	0.00408139	0.000891842	4.73139e-06	0	0	4.67835	0.699148	0.0014973	0.00342963	0.00800524	0.00264599	0.00681574	0.00446108	0.00253929	0.00178866	0.00547462	0.00313851	0.00394969	0.00201977	0.00732611	0.00376148	0.00334246	0.00166745
cg15817482	chr14	94423801	OpenSea	ASB2	TSS200	8	0.00388528	0.000849088	4.74342e-06	0.00388528	0.000849088	4.74342e-06	0	0	5.33817	0.618768	0.00973644	0.00418241	0.00570364	0.00330694	0.00938389	0.00419093	0.00189353	0.00148208	0.00257786	0.00364468	0.00457975	0.00198727	0.00456056	0.00329323	0.00399842	0.00151566
cg19856897	chr7	142495846	S_Shore			8	-0.0116657	0.00249477	2.92442e-06	-0.011729	0.0025649	4.81028e-06	0.00144575	0	5.9366	0.547171	-0.0198482	0.00981429	-0.0112168	0.00725917	-0.0387336	0.0129502	-0.00734194	0.0053737	-0.0159753	0.00884498	-0.014208	0.00483222	-0.00829063	0.00860182	-0.00647742	0.00521662
cg04017672	chr1	182359056	N_Shore	GLUL;GLUL;GLUL	5'UTR;5'UTR;5'UTR	8	-0.00322418	0.000705067	4.8108e-06	-0.00322418	0.000705067	4.8108e-06	0	0	5.66941	0.578836	-0.00325931	0.00292606	-0.00554199	0.00210356	-0.00536623	0.00320868	-0.00217301	0.00152002	-0.00561631	0.00278884	-0.00127106	0.00138028	-0.00616109	0.0022682	-0.00297016	0.00142828
cg06760830	chr1	47079672	S_Shore	MOBKL2C;MOBKL2C	Body;5'UTR	8	-0.00589323	0.00100785	4.99544e-09	-0.0062318	0.00136343	4.86137e-06	0.00235502	0.344792	10.6836	0.153026	-0.00745163	0.00408079	-0.00598884	0.0027669	-0.0148065	0.00403525	-0.00384794	0.00222459	9.56425e-05	0.00371764	-0.00508944	0.00193371	-0.0137258	0.00367204	-0.00590867	0.00216609
cg13961576	chr10	1228316	N_Shelf	ADARB2	3'UTR	6	0.00664714	0.00145534	4.93792e-06	0.00664714	0.00145534	4.93792e-06	0	0	3.29348	0.65484	0.00586574	0.00392519	0.0032118	0.00342154	0.0144763	0.00492739			0.00514668	0.00353268	0.00784396	0.00228123	0.00678555	0.00409336
cg05656442	chr1	111175082	OpenSea			8	0.00721149	0.00126986	1.35503e-08	0.0076585	0.00168255	5.32055e-06	0.00292303	0.207242	8.82993	0.265098	0.00813162	0.00372292	0.00722525	0.00574117	0.010502	0.00469493	0.00455142	0.00272774	0.00913551	0.00398567	0.0103423	0.00313001	0.0132648	0.00323889	0.00222714	0.00262125
cg03345668	chr1	47081524	N_Shore	MOBKL2C;MOBKL2C	TSS1500;5'UTR	8	-0.00616775	0.00135569	5.37667e-06	-0.00616775	0.00135569	5.37667e-06	0	0	6.64624	0.466619	0.00073947	0.00582335	-0.0167442	0.00471734	-0.00646862	0.00577186	-0.00518277	0.00262411	-0.00781817	0.0054662	-0.00538101	0.00297183	-0.0077043	0.00554188	-0.00503072	0.00245171
cg02556649	chr11	1945564	N_Shore	TNNT3;TNNT3;TNNT3;TNNT3	Body;Body;Body;Body	8	0.0038513	0.00079104	1.12359e-06	0.00395786	0.000870159	5.40464e-06	0.000788678	0	6.42779	0.490777	0.00150239	0.00375502	0.00445344	0.00290834	0.0117177	0.00389139	0.0029135	0.00141324	0.00325028	0.00362193	0.00502051	0.00181962	0.00907391	0.00353703	0.00299874	0.00137503
cg08007986	chr9	37576030	Island	FBXO10	5'UTR	8	0.00410209	0.000902422	5.47679e-06	0.00410209	0.000902422	5.47679e-06	0	0	5.77811	0.565884	0.00785173	0.00323316	0.000522933	0.00272435	0.00800364	0.00319422	0.00402858	0.00190725	0.0080908	0.00350424	0.00396521	0.00192925	0.00317089	0.00287308	0.00298166	0.00188274
cg05331856	chr13	40516584	OpenSea			8	0.0046948	0.0010333	5.53241e-06	0.0046948	0.0010333	5.53241e-06	0	0	4.23205	0.752696	0.00852769	0.00476593	0.00712806	0.0035489	0.00560239	0.00432942	0.00636257	0.00199396	0.00225502	0.00473181	0.0012448	0.00219889	0.00434314	0.00336173	0.00485848	0.00194886
cg15210427	chr20	23548991	OpenSea	CST9L	1stExon	8	0.00480729	0.000959928	5.50072e-07	0.00508475	0.00111997	5.62297e-06	0.0012905	0	5.77589	0.566148	0.00387723	0.00424612	0.00983665	0.00345116	0.00652236	0.00579993	0.00430213	0.00180797	0.00753936	0.00406774	0.00693093	0.00223644	0.00647731	0.00380763	0.00241827	0.00163022
cg01194057	chr4	96470626	Island	UNC5C	TSS1500	8	0.00112427	0.000244575	4.28957e-06	0.00112951	0.000249084	5.76969e-06	7.91949e-05	0	6.58495	0.473333	0.00138553	0.00155393	0.000860579	0.0015439	0.00186581	0.00141301	0.00118555	0.000351321	0.00050779	0.00157634	0.00297537	0.00106116	0.00365679	0.0015035	0.00071773	0.000378708
cg03910874	chr6	209712	OpenSea			8	0.00588832	0.00103889	1.44575e-08	0.00633414	0.00139744	5.82399e-06	0.00238413	0.381019	11.3089	0.125701	0.00583138	0.00405664	0.00890122	0.00361975	0.0127872	0.00410702	0.00124199	0.00211634	0.0129843	0.00379964	0.00669752	0.00208246	0.00298603	0.00342438	0.00587562	0.00214845
cg22579114	chr7	100916357	OpenSea			8	0.00565432	0.00118759	1.92485e-06	0.00564025	0.00124689	6.08385e-06	0.000887285	0	6.00928	0.538666	0.00034767	0.00512337	0.00861649	0.00367271	0.00753254	0.00545851	0.00790047	0.00230803	0.0024062	0.00459196	0.00857723	0.00269099	0.00096946	0.00453514	0.00332844	0.00219795
cg27180443	chr12	125348871	S_Shore	SCARB1;SCARB1	TSS1500;TSS1500	6	0.00650671	0.00127261	3.17289e-07	0.006432	0.00142222	6.11086e-06	0.00142266	0	4.99085	0.416998	0.00946547	0.00319354	0.00250058	0.00291737	0.00671137	0.0039759			0.0028456	0.00315912	0.00864492	0.0020932	0.00804433	0.00356725
cg15891991	chr1	117396695	OpenSea			8	0.00386469	0.000806126	1.63365e-06	0.00386671	0.000855262	6.1524e-06	0.000724571	0.084967	7.65	0.364466	0.00178515	0.0033038	0.00594171	0.00226614	0.00511023	0.00334316	0.00180597	0.00186745	-0.000618454	0.00294873	0.00301608	0.00154376	0.00658482	0.00210936	0.00614444	0.00187665
cg15146621	chr5	135364568	Island	TGFBI	TSS200	8	0.00372588	0.000825405	6.36165e-06	0.00372588	0.000825405	6.36165e-06	0	0	2.23111	0.94595	0.00457305	0.00366992	0.00179358	0.00275264	0.00394947	0.00338215	0.0034618	0.00149073	0.00541103	0.00335039	0.00613641	0.00216243	0.00401676	0.00252461	0.0028808	0.00155609
cg14178364	chr9	37529128	OpenSea	FBXO10	Body	6	0.00762185	0.0015751	1.30523e-06	0.00767969	0.00170368	6.55339e-06	0.00141545	0.140332	5.8162	0.324517	0.0155008	0.00398641	0.00992068	0.00374662	0.00509511	0.00599859			0.00627753	0.00365401	0.00580987	0.00253785	0.00246599	0.00434657
cg26301690	chr1	50569610	OpenSea	ELAVL4;ELAVL4;ELAVL4	Body;5'UTR;1stExon	8	0.00383133	0.000851625	6.83226e-06	0.00383133	0.000851625	6.83226e-06	0	0	6.03728	0.535403	0.0019533	0.00363719	0.00926036	0.00286541	0.0071463	0.0038144	0.00256959	0.0015517	0.00158832	0.00345202	0.00537589	0.00202458	0.00334191	0.00341902	0.00311794	0.00155753
cg14120129	chr5	135364575	Island	TGFBI	TSS200	8	0.00311082	0.00069272	7.09773e-06	0.00311082	0.00069272	7.09773e-06	0	0	4.44505	0.727324	0.00334498	0.00359008	0.00164475	0.00306432	0.00531558	0.00280168	0.00260274	0.00109579	0.00694537	0.00353816	0.00693032	0.00249207	0.00243755	0.00264372	0.00252642	0.00114967
cg03882777	chr6	33160965	Island	COL11A2;COL11A2;COL11A2;COL11A2	TSS1500;TSS1500;TSS1500;TSS1500	8	0.000751716	0.000167554	7.24377e-06	0.000751716	0.000167554	7.24377e-06	0	0	4.67454	0.699611	0.0014317	0.00153044	0.00348475	0.00163723	-0.000538995	0.00192723	0.000758407	0.000237302	-0.000313905	0.00189319	-0.000605277	0.001203	0.000732066	0.00177585	0.000766573	0.000234247
cg25963041	chr19	57049777	Island	ZFP28	TSS1500	8	0.00281672	0.000628062	7.29876e-06	0.00281672	0.000628062	7.29876e-06	0	0	4.46791	0.724578	0.00137739	0.00332189	0.0064277	0.00330039	0.0047179	0.00381127	0.00323699	0.000864637	-0.00261313	0.00395216	0.00362779	0.00234694	-0.000980199	0.00414129	0.00236989	0.00107662
cg16747928	chr6	4370460	OpenSea			8	0.00520795	0.00113349	4.3355e-06	0.00519318	0.00115828	7.342e-06	0.000561547	0.00588793	7.04146	0.424576	-0.0011347	0.00454446	0.0117546	0.00383248	-0.000701243	0.00513855	0.00407821	0.00228511	0.00187718	0.00400507	0.00683905	0.00255229	0.00532197	0.00406628	0.00621418	0.00208968
cg08541862	chr1	43829524	N_Shelf	ELOVL1	3'UTR	8	0.00343902	0.000767313	7.3982e-06	0.00343902	0.000767313	7.3982e-06	0	0	0.868384	0.996682	0.00232511	0.00377676	0.00502646	0.00288461	0.00431531	0.00324218	0.00368919	0.00141529	0.00204393	0.00317694	0.00308089	0.00173981	0.0021957	0.00262581	0.00372546	0.00140357
cg24158157	chr10	124581726	S_Shelf			6	0.00714578	0.00159451	7.41235e-06	0.00714578	0.00159451	7.41235e-06	0	0	3.03626	0.694395	0.0114467	0.00516932	0.00510682	0.00395611	0.00210661	0.00478533			0.00321082	0.00465191	0.00810995	0.00233278	0.0100906	0.003833
cg01455766	chr16	3211341	S_Shore			8	0.00686629	0.0015343	7.63376e-06	0.00686629	0.0015343	7.63376e-06	0	0	4.10988	0.767038	0.00146581	0.00640028	0.0114307	0.00543869	0.00191903	0.00731323	0.00759629	0.00302274	0.00672302	0.00583745	0.0114263	0.00349529	0.00632883	0.00575096	0.00433528	0.00271045
cg04588708	chr16	811078	OpenSea	MSLN;MSLN	TSS200;TSS200	8	0.004348	0.000972279	7.75038e-06	0.004348	0.000972279	7.75038e-06	0	0	1.18298	0.991314	0.00520791	0.00442857	0.00551584	0.00317752	0.00491524	0.00494905	0.00355854	0.00188133	0.0013141	0.00443887	0.00570868	0.00209281	0.0034962	0.00420091	0.00427662	0.00170554
cg15552493	chr2	102387391	OpenSea	MAP4K4;MAP4K4;MAP4K4	Body;Body;Body	8	0.00563859	0.00126236	7.94308e-06	0.00563859	0.00126236	7.94308e-06	0	0	5.14519	0.64225	0.00363073	0.00506871	0.00274802	0.00433267	0.0146635	0.00500104	0.00454957	0.00252052	0.0113157	0.00449507	0.00648255	0.00277379	0.00452972	0.00456033	0.00443328	0.00241332
cg10058464	chr4	81257211	Island	C4orf22	Body	8	0.00130958	0.0002933	8.00687e-06	0.00130958	0.0002933	8.00687e-06	0	0	3.61195	0.82323	0.00207845	0.00191334	0.000287942	0.00150354	0.00172431	0.00226737	0.0015649	0.000437153	0.00387065	0.00212053	0.00232098	0.00136122	0.000694931	0.00196064	0.000951583	0.00043095
cg26902216	chr8	120220410	Island	MAL2	TSS200	8	0.00233504	0.000523276	8.10695e-06	0.00233504	0.000523276	8.10695e-06	0	0	6.91111	0.438193	0.00617951	0.00223226	0.00262499	0.00196771	5.13051e-05	0.00237438	0.00204554	0.000830009	0.00169716	0.00273929	0.00467267	0.00168041	0.00436543	0.00231834	0.00146706	0.000903321
cg26661640	chr11	64458846	OpenSea	NRXN2;NRXN2	Body;Body	8	0.00390522	0.000875853	8.24339e-06	0.00390522	0.000875853	8.24339e-06	0	0	2.75596	0.906623	0.000839839	0.00395283	0.00548877	0.00317218	0.00943463	0.00379987	0.00363306	0.00164355	0.00308804	0.00330337	0.00355452	0.00182115	0.00220492	0.00335607	0.00440501	0.00170252
cg20069688	chr6	31941049	S_Shore	STK19;STK19;DOM3Z;STK19	Body;Body;TSS1500;Body	8	0.00433202	0.000972004	8.31954e-06	0.00433202	0.000972004	8.31954e-06	0	0	5.69473	0.575812	0.00756989	0.0034783	0.00824119	0.00329294	0.00599875	0.00416197	0.00140454	0.00216283	0.00697201	0.00319869	0.00307493	0.00189724	0.0062583	0.00284136	0.00338671	0.00212312
cg06342416	chr21	45773569	OpenSea	TRPM2;TRPM2	5'UTR;1stExon	8	-0.00219074	0.000491857	8.42765e-06	-0.00219074	0.000491857	8.42765e-06	0	0	5.51709	0.597124	-0.000812666	0.0019919	-0.00152726	0.00145505	-0.00107992	0.00242049	-0.00119965	0.000923997	-0.00473729	0.00188489	-0.0033605	0.00118903	-0.00492866	0.00236195	-0.0021267	0.000892145
cg26121234	chr3	13899618	S_Shelf	WNT7A	Body	8	0.00529249	0.00118917	8.56433e-06	0.00529249	0.00118917	8.56433e-06	0	0	0.811686	0.997323	0.00376476	0.00531656	0.00489453	0.0035686	0.00879493	0.00599366	0.00525054	0.00223627	0.00664268	0.00442721	0.00664966	0.00279669	0.00389527	0.00431593	0.00464113	0.00224861
cg09200921	chr13	49867061	OpenSea	CDADC1	3'UTR	8	-0.00500192	0.00110478	5.96803e-06	-0.00500611	0.00112582	8.72204e-06	0.000516597	0	5.76413	0.567544	0.00313472	0.00539418	-0.00610329	0.00325377	-0.00928652	0.00396347	-0.00173125	0.00245909	-0.0059075	0.00468698	-0.00500733	0.00211358	-0.0092002	0.00379469	-0.00578269	0.0021949
cg01979270	chr16	2589773	S_Shore	PDPK1;PDPK1	Body;Body	4	0.00946363	0.00212861	8.75183e-06	0.00946363	0.00212861	8.75183e-06	0	0	2.111	0.549691	0.00841356	0.00387774			0.00661903	0.00470579			0.0078636	0.00359752			0.0150385	0.00400245
cg07477009	chr13	96705395	Island	UGGT2	Body	8	0.00331306	0.00073887	7.3274e-06	0.00331785	0.000747729	9.11235e-06	0.000248907	0	6.49673	0.483087	0.00283246	0.00367856	0.00246609	0.00332768	0.00489464	0.0028604	0.00421055	0.00126675	0.0109078	0.0036221	0.00261356	0.00165967	0.00240686	0.00258855	0.00184116	0.00138172
cg01986263	chr20	58659848	N_Shelf			8	0.00399823	0.000901239	9.1489e-06	0.00399823	0.000901239	9.1489e-06	0	0	4.68315	0.698566	0.0078104	0.00360017	0.00338132	0.00294732	0.00373439	0.00443733	0.0019359	0.00181677	0.00791987	0.00362931	0.00526435	0.00190811	0.00642453	0.00340693	0.00294242	0.00166122
cg10922232	chr17	73238491	OpenSea	GGA3;GGA3	Body;Body	8	0.00435015	0.000980708	9.17637e-06	0.00435015	0.000980708	9.17637e-06	0	0	4.33192	0.740851	0.00379959	0.00411772	0.00549989	0.0033119	0.00696952	0.0041909	0.00730858	0.00198973	0.00147271	0.00381722	0.00194701	0.00198959	0.00387953	0.00327915	0.00413224	0.00192635
cg18603538	chr7	127894591	OpenSea	LEP	Body	8	0.00505629	0.000921903	4.1435e-08	0.00532904	0.0012018	9.23996e-06	0.00183633	0.0322608	7.23335	0.404994	0.00580742	0.00430744	0.00468127	0.00318635	0.0112325	0.00467246	0.00311091	0.00174213	0.00559302	0.00382634	0.00868753	0.0019155	0.00666092	0.0033844	0.00306015	0.00173507
cg13929323	chr9	114364066	S_Shelf			8	0.00861245	0.00181463	2.07358e-06	0.00915674	0.00206526	9.26334e-06	0.00200115	0	6.43545	0.48992	0.00952928	0.00781022	0.016638	0.00854102	0.0170494	0.0117073	0.00815486	0.00301635	0.0124719	0.00760427	0.0123579	0.00563678	0.0224753	0.00777666	0.0045348	0.00292422
cg21172540	chr1	32827840	Island	LOC100128071;LOC100128071;TSSK3	1stExon;5'UTR;TSS200	8	0.00387564	0.000838127	3.76092e-06	0.00390148	0.000880155	9.30528e-06	0.000602128	0	6.77325	0.452865	0.000217894	0.00403116	0.00737264	0.00300219	0.00142223	0.00296432	0.00420443	0.00151868	0.00324986	0.00346899	0.00804572	0.00225227	0.00275637	0.00308652	0.0024025	0.00147338
cg10715147	chr15	42186473	OpenSea	SPTBN5	TSS200	8	-0.00186357	0.000420553	9.36982e-06	-0.00186357	0.000420553	9.36982e-06	0	0	3.22618	0.863321	0.000650391	0.0025811	-0.00259111	0.00191617	-0.00483286	0.00274196	-0.0017673	0.000686558	-0.00257395	0.00251437	-0.000803205	0.00122751	-0.00378989	0.00215658	-0.00193666	0.000643478
cg10210094	chr1	201374614	OpenSea	TNNI1	3'UTR	8	0.00382109	0.00086318	9.56569e-06	0.00382109	0.00086318	9.56569e-06	0	0	1.90977	0.964665	0.0034771	0.00358212	0.0065906	0.00294698	0.000524907	0.00435153	0.00273069	0.00160697	0.00351451	0.00325251	0.00448552	0.00192104	0.00491407	0.0034398	0.00398552	0.00161857
cg25112438	chr3	15839498	OpenSea	ANKRD28	Body	8	-0.00210674	0.00047729	1.01491e-05	-0.00210674	0.00047729	1.01491e-05	0	0	3.82859	0.799296	-0.00140702	0.00230313	-0.00397242	0.00143357	-0.00179056	0.00212943	-0.00210086	0.000956437	-0.00389954	0.00213734	-0.000842954	0.000998613	-0.00234146	0.00153855	-0.00203835	0.000915683
cg05703659	chr7	158494734	N_Shelf	NCAPG2	5'UTR	8	0.00410045	0.000929026	1.01615e-05	0.00410045	0.000929026	1.01615e-05	0	0	6.49121	0.4837	0.00944088	0.00398072	0.00440215	0.00378552	0.0073664	0.00517724	0.00492318	0.00156527	0.00224612	0.00379491	0.00059327	0.00237975	0.00923575	0.00358545	0.00314413	0.00166175
cg10913077	chr3	57080664	OpenSea	ARHGEF3	5'UTR	8	0.0046258	0.00105143	1.08481e-05	0.0046258	0.00105143	1.08481e-05	0	0	6.22316	0.513947	0.0103662	0.00491474	0.00638047	0.00388838	0.00389513	0.00409528	0.00307736	0.0019778	-0.000981471	0.00429324	0.00740322	0.00238906	0.00860101	0.0036765	0.00350931	0.00192839
cg07880384	chr6	31913323	OpenSea	C2;C2;CFB	3'UTR;3'UTR;TSS1500	8	0.00541888	0.00116585	3.35123e-06	0.00571064	0.00129826	1.08909e-05	0.0011894	0	6.248	0.511109	0.00909983	0.00531725	0.0105864	0.00576346	0.0101947	0.00546607	0.00291232	0.00209693	0.005163	0.00623684	0.0109269	0.00372359	0.00818764	0.00329523	0.00399305	0.00184754
cg04918831	chr1	241795170	OpenSea	CHML;CHML;OPN3	3'UTR;1stExon;Body	8	-0.00298202	0.000678194	1.09759e-05	-0.00298202	0.000678194	1.09759e-05	0	0	5.78536	0.565023	-0.00910193	0.0037549	-0.00623668	0.00302318	-0.00736046	0.00456872	-0.00202721	0.00105331	-0.00244151	0.00323873	-0.00336006	0.00219747	-0.00582204	0.00333033	-0.00248667	0.00109402
cg25320169	chr2	206641630	OpenSea	NRP2;NRP2;NRP2;NRP2;NRP2	3'UTR;Body;3'UTR;Body;Body	8	0.00373156	0.00084913	1.10993e-05	0.00373156	0.00084913	1.10993e-05	0	0	4.17449	0.759475	0.00115931	0.00377863	0.00539847	0.00271665	0.0038888	0.00362681	0.00191354	0.00170316	0.00837717	0.00316149	0.0032759	0.0018038	0.00379815	0.0028456	0.00433696	0.00165266
cg01418188	chr11	3145609	S_Shelf	OSBPL5;OSBPL5;OSBPL5	Body;Body;Body	8	0.00422847	0.00080809	1.67074e-07	0.00415554	0.000945793	1.1143e-05	0.00122377	0.0545762	7.40409	0.388052	0.00215934	0.0031674	0.00359331	0.00248855	0.00998668	0.00367258	0.00506348	0.00176553	-0.00135266	0.00304243	0.00405322	0.00145871	0.00279404	0.00240713	0.00654632	0.00187636
cg11263997	chr11	70257280	Island	CTTN;CTTN	Body;Body	6	0.00255618	0.000582515	1.14307e-05	0.00255618	0.000582515	1.14307e-05	0	0	1.85905	0.868285	0.00191324	0.00219406			0.00159684	0.00412474	0.00278888	0.00100398	0.00378721	0.00177176			-0.000706706	0.00258369	0.00256205	0.000832069
cg22356061	chr1	227954102	OpenSea	SNAP47	Body	8	-0.00698411	0.00116853	2.27528e-09	-0.00782618	0.0017835	1.14343e-05	0.00331462	0.439191	12.482	0.085782	-0.00130095	0.0051807	-0.00863666	0.00418083	-0.00621088	0.00507674	-0.0061278	0.00221078	-0.0154264	0.00456499	-0.0127677	0.00292563	-0.0116504	0.00463027	-0.00314645	0.00199842
cg26262049	chr11	10628012	OpenSea	MRVI1;MRVI1;MRVI1;MRVI1	Body;Body;Body;Body	6	0.00638593	0.0014553	1.14379e-05	0.00638593	0.0014553	1.14379e-05	0	0	3.75007	0.58593	0.0097584	0.00485242	0.00609662	0.00308103	0.0083888	0.00479529			4.15921e-05	0.00453943	0.0057997	0.00214332	0.0109241	0.00377996
cg06933796	chr1	23925874	OpenSea			8	-0.00316419	0.000720593	1.12785e-05	-0.0031661	0.00072198	1.15828e-05	9.00577e-05	0	6.14464	0.522966	-0.00557556	0.00314744	-0.00319835	0.0030915	-0.0107552	0.00432909	-0.00274058	0.00120737	-0.00137106	0.00297553	-0.00610974	0.00197629	-0.0022365	0.0034759	-0.00205556	0.00120095
cg11854073	chr3	112013357	OpenSea	SLC9A10	TSS1500	4	0.0194813	0.00351083	2.87456e-08	0.0200294	0.00457713	1.2089e-05	0.00566308	0.371687	4.77469	0.189059	0.0277044	0.00632524			0.0287331	0.00786318			0.0114648	0.00569547			0.0153471	0.0071262
cg27128761	chr5	151055650	OpenSea	SPARC	Body	8	0.00450774	0.00103215	1.25769e-05	0.00450774	0.00103215	1.25769e-05	0	0	3.32058	0.853848	0.00296008	0.00387468	0.00670972	0.00331343	0.00070621	0.00598798	0.00671899	0.0021372	0.0067445	0.00353976	0.00303536	0.00208824	0.00528209	0.00363127	0.00295674	0.0020612
cg27305772	chr11	65630355	S_Shore	MUS81	Body	8	0.00443138	0.00101487	1.26275e-05	0.00443138	0.00101487	1.26275e-05	0	0	3.35688	0.850144	0.00486928	0.00401294	0.00460109	0.00359504	-0.00132759	0.00476908	0.00533657	0.0020203	0.00356115	0.00374736	0.00463574	0.00212406	0.00930582	0.00349137	0.00314414	0.00195695
cg22772698	chr20	56195991	OpenSea	ZBP1;ZBP1;ZBP1;ZBP1	TSS1500;TSS1500;TSS1500;TSS1500	4	-0.00821753	0.00188226	1.26667e-05	-0.00821753	0.00188226	1.26667e-05	0	0	1.1847	0.756675	-0.00581789	0.00412973			-0.0111901	0.00351735			-0.00636362	0.00364082			-0.00928257	0.00290404
cg03447556	chr3	39230226	OpenSea	XIRP1	Body	8	0.00462742	0.00104692	9.86761e-06	0.0046513	0.00106567	1.27321e-05	0.000445644	0.0274883	7.19786	0.408574	-0.000474802	0.0052428	0.00533672	0.00364798	0.000670248	0.00510718	0.0034841	0.00195315	0.0112805	0.00469553	0.00735051	0.00245373	0.00903462	0.00327047	0.00281197	0.00187385
cg19165216	chr11	811661	S_Shore	RPLP2;SNORA52	Body;TSS200	8	0.00385271	0.000881258	1.23212e-05	0.00385602	0.000884234	1.29549e-05	0.000166131	0.0588191	7.43746	0.384794	0.00401301	0.00354178	0.00316282	0.00328274	0.011855	0.0040118	0.00442134	0.00163754	0.00720935	0.00334555	0.000722468	0.00192743	0.00694909	0.00333229	0.00316731	0.0016802
cg11428546	chr2	100723110	S_Shelf	AFF3;AFF3	TSS1500;5'UTR	8	-0.00225087	0.000517175	1.34749e-05	-0.00225087	0.000517175	1.34749e-05	0	0	4.48179	0.72291	-0.000998612	0.00271823	-0.003806	0.00261861	-0.000339322	0.00334609	-0.00143631	0.000824342	-0.00246198	0.00259973	-0.00411003	0.001623	-0.00657169	0.00298486	-0.00227689	0.000799201
cg11743675	chr12	41221855	OpenSea	CNTN1;CNTN1	5'UTR;5'UTR	8	-0.0108498	0.00245962	1.02817e-05	-0.0108404	0.00249357	1.37803e-05	0.000975706	0	4.75715	0.689572	-0.0113277	0.00853207	0.000621668	0.00813641	-0.0316484	0.0143008	-0.0113945	0.00495683	-0.011805	0.00768482	-0.015432	0.00523004	-0.00261725	0.0108558	-0.00943143	0.00481807
cg01899437	chr4	24914441	OpenSea	CCDC149;CCDC149	1stExon;5'UTR	8	0.000954695	0.000219625	1.38049e-05	0.000954695	0.000219625	1.38049e-05	0	0	2.98409	0.88647	-0.000115528	0.00249707	0.00111028	0.00224478	-0.00122715	0.00233324	0.00122574	0.000300223	0.000418853	0.00216785	0.00129368	0.00166358	-0.00162593	0.00224141	0.000771538	0.000317149
cg22219450	chr11	34244798	OpenSea	ABTB2	Body	8	0.00485068	0.00111631	1.39092e-05	0.00485068	0.00111631	1.39092e-05	0	0	3.41195	0.844462	0.00689919	0.00436756	0.0094474	0.00383022	0.00841901	0.00594534	0.00271236	0.00221323	0.00727859	0.00397768	0.00429633	0.00242736	0.00611592	0.00418306	0.00405897	0.00207506
cg15120848	chr1	39407998	OpenSea	RHBDL2	TSS1500	8	-0.00263863	0.00060748	1.40193e-05	-0.00263863	0.00060748	1.40193e-05	0	0	4.44394	0.727457	0.00300675	0.00355821	-0.00402347	0.00304396	-0.00260359	0.0040237	-0.00343459	0.000958084	-0.00380939	0.00319682	-0.000521824	0.00200945	-0.00139301	0.0030112	-0.00254454	0.000935189
cg24744697	chr11	6503801	S_Shore	ARFIP2;FXC1	TSS1500;3'UTR	8	-0.0034186	0.000789244	1.48105e-05	-0.0034186	0.000789244	1.48105e-05	0	0	6.35054	0.499466	-0.00184647	0.00406617	-0.0107442	0.00359724	0.000101643	0.00556894	-0.00381525	0.00125246	-0.00232481	0.00349031	-0.00401177	0.00239348	0.00204734	0.00418345	-0.00273061	0.00127301
cg02471183	chr8	67456683	S_Shore			8	0.00421364	0.000973112	1.49062e-05	0.00421364	0.000973112	1.49062e-05	0	0	5.39851	0.611452	0.0046454	0.00465657	0.0102281	0.00330756	0.00589115	0.00496194	0.00273883	0.00185962	0.00413437	0.00439944	0.0056918	0.00217947	0.000273477	0.00341094	0.003638	0.00171555
cg17892556	chr19	12267464	Island	ZNF625;ZNF625	1stExon;5'UTR	8	0.00365674	0.000844717	1.49819e-05	0.00365674	0.000844717	1.49819e-05	0	0	2.47911	0.928662	0.00597942	0.0035039	0.0055054	0.00262887	0.00338719	0.00266883	0.00430452	0.0015402	0.000675911	0.00389948	0.00439445	0.00226224	0.00159778	0.00271793	0.00268948	0.0016466
cg15962267	chr5	138612986	S_Shelf	SNHG4;SNORA74A;MATR3	Body;TSS1500;5'UTR	8	0.00452597	0.00103314	1.1825e-05	0.00452728	0.00104645	1.51628e-05	0.00038659	0	4.41046	0.731471	0.00250663	0.00387448	0.00198625	0.00377393	0.00521241	0.00553857	0.00183745	0.00196429	0.00505581	0.00363974	0.00753308	0.00242394	0.00617264	0.00354341	0.00585156	0.00192575
cg09360044	chr2	68557960	OpenSea			6	0.00606702	0.00137043	9.55138e-06	0.00608106	0.00140656	1.53662e-05	0.000643081	0.126987	5.72729	0.333665	0.0126971	0.00417459	0.00930469	0.00307971	0.00657573	0.00534158			0.00153133	0.00358258	0.00537502	0.00204083	0.00269013	0.00366599
cg10896594	chr8	833183	S_Shore			6	0.00667963	0.0015451	1.53842e-05	0.00667963	0.0015451	1.53842e-05	0	0	3.65698	0.599779	0.00242576	0.00450683	0.00311887	0.00353203	0.00303287	0.00574338			0.00930896	0.00400762	0.00781123	0.00237065	0.0107956	0.00389913
cg26328951	chr1	28906514	N_Shore	SNHG12;SNORD99;SNORA61	Body;TSS1500;TSS200	8	0.00424995	0.000983585	1.55411e-05	0.00424995	0.000983585	1.55411e-05	0	0	2.71793	0.909813	0.000475705	0.00381427	0.00328906	0.00333418	0.00659113	0.0048791	0.00277443	0.00185018	0.00446334	0.0034006	0.00542143	0.00223624	0.00425715	0.00363601	0.00595983	0.00190923
cg01834210	chr5	153858967	Island	HAND1	TSS1500	8	0.000890421	0.000206096	1.55737e-05	0.000890421	0.000206096	1.55737e-05	0	0	5.34977	0.61736	0.00317351	0.00177517	0.00293669	0.00150273	0.00105684	0.00164838	0.000632128	0.000308354	-0.000706819	0.00170646	0.00158252	0.00112687	0.00152841	0.00158551	0.0009679	0.00028632
cg03545620	chr1	26871525	OpenSea	RPS6KA1;RPS6KA1	TSS1500;Body	6	0.00728912	0.0016876	1.5658e-05	0.00728912	0.0016876	1.5658e-05	0	0	2.05266	0.841811	0.00698739	0.00424197	0.00886544	0.00413593	0.00983156	0.0055831			0.00509468	0.00387666	0.0056885	0.00277382	0.0126966	0.00462943
cg23200506	chr11	116694171	S_Shore	APOA4	TSS200	8	0.00413934	0.000959194	1.59291e-05	0.00413934	0.000959194	1.59291e-05	0	0	1.76011	0.971918	0.00345686	0.00438106	0.00583342	0.00346021	0.00126917	0.00497625	0.00433832	0.00188582	0.0017063	0.00434939	0.00376207	0.00208779	0.00783756	0.00354031	0.00395648	0.00164821
cg21484315	chr2	2712669	OpenSea			8	0.00451999	0.00104768	1.60129e-05	0.00451999	0.00104768	1.60129e-05	0	0	2.25062	0.944677	0.000729678	0.00529412	0.00536377	0.00372999	0.00784996	0.00544481	0.00480154	0.00194356	0.00801932	0.00493353	0.00353399	0.00239153	0.000868564	0.00383009	0.00506814	0.00180886
cg10734581	chr14	101520078	OpenSea	MIR134;MIR382	TSS1500;TSS1500	8	0.0033186	0.000769502	1.61301e-05	0.0033186	0.000769502	1.61301e-05	0	0	4.76616	0.688475	0.00714833	0.00334231	0.00536212	0.00257847	0.0028869	0.00324978	0.00231098	0.00158727	0.00124795	0.00311368	0.00531223	0.00163844	0.00136578	0.00251435	0.00246419	0.00142716
cg07218344	chr13	50571702	S_Shore	TRIM13;TRIM13;TRIM13;TRIM13;TRIM13;DLEU2	5'UTR;5'UTR;5'UTR;5'UTR;1stExon;Body	8	-0.00225523	0.000524689	1.72175e-05	-0.00225523	0.000524689	1.72175e-05	0	0	5.17826	0.63822	-0.00523763	0.00263527	-0.000165172	0.00156038	-0.00123686	0.00234773	-0.00228831	0.00099982	-0.00344466	0.00256558	-0.00363871	0.00113181	-0.00251135	0.00187666	-0.00150685	0.000984915
cg15227982	chr10	104535854	OpenSea	C10orf26;C10orf26	TSS200;Body	8	-0.00430347	0.00100137	1.72655e-05	-0.00430347	0.00100137	1.72655e-05	0	0	4.8237	0.681468	-0.00729956	0.00468388	-0.0046528	0.00255314	-0.00825073	0.00334616	-0.00134746	0.00268964	-0.00597594	0.00426808	-0.00491734	0.00178537	-0.00697902	0.0031595	-0.00145162	0.0021835
cg26494044	chr10	129760954	OpenSea	PTPRE	5'UTR	8	0.00471997	0.00105993	8.46402e-06	0.00474712	0.00110706	1.80264e-05	0.000746111	0.147539	8.21152	0.314313	-0.000702869	0.00437688	0.00561688	0.00337543	0.00556588	0.00542278	0.0032238	0.00209215	0.0132094	0.00409617	0.00741685	0.00238876	0.00128512	0.00375985	0.00384178	0.00194554
cg25074185	chr11	71950924	Island	PHOX2A	Body	8	0.00077992	0.000182019	1.82886e-05	0.00077992	0.000182019	1.82886e-05	0	0.410746	11.8794	0.104594	0.00451655	0.00151076	0.00260342	0.00156263	0.00302599	0.00158776	0.000669883	0.000257584	0.00155105	0.00266112	0.00221953	0.00112159	0.00246031	0.00151338	0.00057425	0.000259232
cg18474885	chr21	46292084	N_Shore	PTTG1IP	Body	8	-0.00372061	0.000854865	1.34732e-05	-0.00371212	0.000866361	1.82962e-05	0.000345356	0	6.26344	0.509348	0.00399338	0.00349742	-0.00600724	0.00252176	-0.00346816	0.00371953	-0.00385017	0.00180633	-0.00278756	0.00334413	-0.00325907	0.00169158	-0.00346928	0.00255944	-0.00528876	0.00182731
cg12120367	chr8	102093206	Island			8	0.000798988	0.000186681	1.86912e-05	0.000798988	0.000186681	1.86912e-05	0	0	6.22217	0.514061	0.0024305	0.00187959	0.00284449	0.00157244	0.0045466	0.00196349	0.000777085	0.00026434	0.00210137	0.00169101	0.00116997	0.00105865	-1.23809e-05	0.00166474	0.000651583	0.000266642
cg18143317	chr11	2037124	S_Shelf			8	0.00434829	0.0010166	1.8919e-05	0.00434829	0.0010166	1.8919e-05	0	0	6.04774	0.534186	-0.00280218	0.00490894	0.00301484	0.00302287	0.00780984	0.00435282	0.00764467	0.00200219	0.000317015	0.00440535	0.00422596	0.00222867	0.00339796	0.00376398	0.00377305	0.00187855
cg12392104	chr15	55665153	OpenSea	CCPG1;MIR628;CCPG1	Body;Body;Body	8	0.00437924	0.00102439	1.91147e-05	0.00437924	0.00102439	1.91147e-05	0	0	3.65686	0.818343	0.00504487	0.00424291	0.00584	0.00297696	0.00240068	0.00338366	0.00252107	0.00215912	0.0103154	0.00381882	0.00398507	0.00217145	0.00361231	0.00347719	0.00461889	0.00213401
cg12067423	chr15	85141633	N_Shelf			8	-0.00270729	0.000633519	1.92497e-05	-0.00270729	0.000633519	1.92497e-05	0	0	4.0015	0.779604	-0.000620293	0.0028453	-0.00310297	0.00367352	-0.00414737	0.00231968	-0.00201533	0.0013161	-0.00586753	0.00261959	-0.00174058	0.00108167	-0.00467102	0.00195102	-0.00312633	0.00135038
cg10717691	chr1	210426358	OpenSea			8	0.00305	0.000714202	1.95032e-05	0.00305	0.000714202	1.95032e-05	0	0	3.37105	0.848689	0.00746916	0.00367789	0.00405422	0.00247801	0.000821656	0.00341798	0.00256654	0.00124129	0.00318157	0.00329141	0.0045625	0.00183825	0.00493664	0.00316647	0.00218958	0.00121518
cg17900854	chr21	40984777	OpenSea	C21orf88;C21orf88	TSS200;TSS200	8	0.00117698	0.000257146	4.7149e-06	0.00117706	0.000275854	1.98138e-05	0.000159892	0.102673	7.80095	0.350473	0.00169665	0.0019997	0.0024276	0.00202425	-0.00199738	0.00218335	0.00152264	0.000371472	0.00456971	0.00196393	-0.000382008	0.00124491	0.00123836	0.00181503	0.000879419	0.000373421
cg05318454	chr19	46117805	N_Shore	EML2	Body	8	0.00413597	0.000969506	1.98954e-05	0.00413597	0.000969506	1.98954e-05	0	0	2.70704	0.910718	0.000402341	0.00402297	0.00760589	0.0040346	0.00515624	0.00447931	0.00470761	0.00185631	0.00740592	0.00381416	0.00314181	0.0021985	0.00289785	0.00330684	0.00385056	0.00172489
cg10716612	chr4	184113429	OpenSea	WWC2	Body	8	0.0046387	0.00108739	1.99087e-05	0.0046387	0.00108739	1.99087e-05	0	0	4.50857	0.719685	-0.000328961	0.00414654	0.00733142	0.0045664	0.00717799	0.00436521	0.00496657	0.00208337	0.00438314	0.0038735	0.00530545	0.00254738	-0.000786284	0.00330363	0.00610342	0.0020796
cg09333580	chr20	31606541	OpenSea	BPIL1	Body	8	-0.00488401	0.00114623	2.03569e-05	-0.00488401	0.00114623	2.03569e-05	0	0	5.16045	0.64039	-0.0107607	0.004743	-0.00852303	0.00408605	-0.0104746	0.00423423	-0.00506094	0.00221659	-0.0042512	0.0041666	-0.00397111	0.00259687	-0.00477547	0.00461358	-0.00208969	0.00213785
cg18183961	chr4	40519094	OpenSea	RBM47;RBM47	TSS1500;5'UTR	8	0.004267	0.00100213	2.06341e-05	0.004267	0.00100213	2.06341e-05	0	0	3.47347	0.838027	0.00571151	0.00455003	0.00106221	0.00328877	0.00827516	0.00581554	0.0035427	0.00188215	0.000609566	0.00405861	0.00398835	0.0021438	0.00527407	0.00452943	0.00628998	0.00181569
cg22777249	chr22	50319194	N_Shelf	CRELD2;CRELD2	Body;Body	8	0.0068757	0.00161582	2.08823e-05	0.0068757	0.00161582	2.08823e-05	0	0	5.2066	0.634766	0.017319	0.00676932	0.00853033	0.00621769	0.00263102	0.00519824	0.00660907	0.00339476	0.0154305	0.00623249	0.00465924	0.00397211	0.00534379	0.0044852	0.00569063	0.00294499
cg00988037	chr1	54869007	N_Shore	SSBP3;SSBP3;SSBP3	Body;Body;Body	8	-0.00676529	0.00144492	2.83927e-06	-0.00728265	0.00171251	2.11297e-05	0.00214942	0.235165	9.1523	0.241906	-0.00405973	0.00558392	-0.00916233	0.00493357	-0.0235138	0.00760947	-0.00593197	0.00273267	-0.012572	0.00528492	-0.00954697	0.00337306	-0.0112302	0.00646314	-0.00213642	0.00259313
cg10455940	chr10	103213706	OpenSea	BTRC;BTRC	Body;Body	8	-0.00809439	0.0018966	1.97374e-05	-0.00809543	0.00190443	2.1297e-05	0.00042995	0	4.95942	0.664916	-0.00276277	0.00676666	-0.0128069	0.00598189	-0.00393274	0.00883824	-0.0061482	0.00417918	-0.0116905	0.00604358	-0.0132407	0.00389454	-0.0088638	0.00612945	-0.0030906	0.00392378
cg22717593	chr19	45647012	N_Shore			8	0.00397988	0.000831939	1.71955e-06	0.00407604	0.000959249	2.14531e-05	0.0010993	0.214947	8.9166	0.2587	0.0103069	0.00346592	0.00573036	0.00309218	0.00741629	0.00360499	0.00519333	0.0015045	-0.00112646	0.00333935	0.00230732	0.00194584	0.00610355	0.00345746	0.00251463	0.00151381
cg04021697	chr1	3567303	Island	WDR8	TSS1500	8	0.00269252	0.000634222	2.18222e-05	0.00269252	0.000634222	2.18222e-05	0	0	3.53821	0.831162	0.00281052	0.00325579	0.0055953	0.00308177	-0.000893875	0.00364829	0.00187477	0.000985251	0.00202758	0.00315417	0.004963	0.0021441	0.000972055	0.00370523	0.0031499	0.00100041
cg04359840	chr16	17563300	OpenSea	XYLT1	Body	8	-0.00887682	0.00171268	2.1833e-07	-0.0100317	0.002363	2.18257e-05	0.00407464	0.388097	11.4397	0.120555	-0.0236664	0.00634887	-0.0201973	0.0060342	-0.00991218	0.00791776	-0.007341	0.00324635	-0.00982981	0.00620935	-0.00646299	0.00390036	-0.0109578	0.00627407	-0.00363652	0.00328152
cg05477514	chr8	23564008	Island	NKX2-6	TSS200	8	-0.00307806	0.000725243	2.19389e-05	-0.00307806	0.000725243	2.19389e-05	0	0	5.37648	0.614122	-0.00438135	0.00296323	-0.00314795	0.00204761	-0.00686017	0.00310011	-0.00329822	0.00138901	-0.00502838	0.00277777	-0.00250903	0.00172018	-0.00796378	0.00334841	-0.00111391	0.00136027
cg26628795	chr2	111435723	Island	BUB1	TSS200	8	-0.00240383	0.000566652	2.21378e-05	-0.00240383	0.000566652	2.21378e-05	0	0	3.96984	0.783245	-0.000725851	0.00193944	-0.00325981	0.00147978	-0.000242665	0.00250268	-0.00343092	0.00128877	-0.00342462	0.00191548	-0.00287596	0.00106021	-0.000692488	0.0025024	-0.00107635	0.00129753
cg10498926	chr2	75146391	N_Shore			8	-0.00160416	0.000378253	2.22554e-05	-0.00160416	0.000378253	2.22554e-05	0	0	3.02837	0.882366	0.000395703	0.00303017	-0.00221508	0.00232651	-0.00558589	0.00319063	-0.00152265	0.000549996	-0.0020135	0.00244684	-0.00268794	0.00148769	-0.00394695	0.00249814	-0.00131485	0.000569956
cg13072057	chr3	160823231	Island	B3GALNT1;B3GALNT1;B3GALNT1;B3GALNT1;B3GALNT1	TSS200;TSS200;TSS200;TSS200;TSS1500	8	0.000695944	0.000164143	2.23665e-05	0.000695944	0.000164143	2.23665e-05	0	0	4.08216	0.770267	0.00246776	0.00148868	8.12705e-05	0.00272356	-0.00138681	0.00182192	0.00058783	0.000232992	0.000223834	0.00145033	-0.000489597	0.00113707	0.00104842	0.00138053	0.000847464	0.000230015
cg13712852	chr2	85814940	S_Shelf	VAMP5	Body	8	-0.00289745	0.000683525	2.24532e-05	-0.00289745	0.000683525	2.24532e-05	0	0	1.65734	0.976358	-0.00340355	0.00296322	-0.00190627	0.00217339	-0.00401106	0.00268248	-0.0021305	0.00135225	-0.00422174	0.00329358	-0.00228359	0.00138324	-0.00472658	0.00200361	-0.00328602	0.00142062
cg10522587	chr1	120166026	Island	ZNF697	Body	4	-0.00393744	0.000910681	1.53493e-05	-0.00394653	0.000931824	2.28275e-05	0.000379106	0.0449655	3.14125	0.370356	-0.00182335	0.00172836			-0.00462421	0.00182264			-0.00372797	0.00148696			-0.00665826	0.00186689
cg24311485	chr7	73181157	N_Shelf			8	0.00476983	0.00097162	9.14728e-07	0.0051513	0.00121741	2.3228e-05	0.00181154	0.300861	10.0123	0.187877	0.00803568	0.00372657	0.0113612	0.00330664	0.0112933	0.00415883	0.00310481	0.00183857	0.000290936	0.00339043	0.00514809	0.00220272	0.00736017	0.0037728	0.00314027	0.00189371

## Sheet: Table S4
ProbeID	Chromosome	Position	Relation to Island	UCSC Reference Gene Name	UCSC Referenc Gene Group	Number of Cohorts	All_Effect_Fixed	All_Effect_SE_Fixed	All_P_Fixed	All_Effect_Random	All_Effect_SE_Random	All_P_Random	All_tau	All_I2	All_Q	All_Het.P	beta_UCL	SE_UCL	beta_Aberdeen	SE_Aberdeen	beta_IoPPN	SE_IoPPN	beta_TOP	SE_TOP
cg04780563	chr10	35748463	OpenSea	CCNY;CCNY	Body;5'UTR	3	-0.0110257	0.00178788	6.96351e-10	-0.0110257	0.00178788	6.96351e-10	0	0	1.14309	0.564653	-0.00819921	0.00320114	-0.0116335	0.00229923	-0.0136806	0.00383913
cg12269535	chr6	43142014	Island	SRF	Body	4	-0.00834798	0.00153153	5.0156e-08	-0.00834798	0.00153153	5.0156e-08	0	0	1.99123	0.574229	-0.0127036	0.00385326	-0.00696311	0.00274207	-0.00484971	0.00408159	-0.00853648	0.00214628
cg25432300	chr5	90508265	OpenSea			4	0.00751946	0.00138749	5.97797e-08	0.00751946	0.00138749	5.97797e-08	0	0	0.212127	0.975608	0.00898429	0.00333731	0.00738999	0.0025279	0.00731673	0.00369838	0.00726118	0.00195263
cg02934509	chr1	1669413	N_Shore	SLC35E2	Body	2	0.00659993	0.00124946	1.27639e-07	0.00659993	0.00124946	1.27639e-07	0	0	0.0311477	0.859911	0.00679227	0.00158337			0.00631584	0.00168459
cg02488934	chr1	156422580	N_Shelf			4	0.00543725	0.00103093	1.33383e-07	0.00543725	0.00103093	1.33383e-07	0	0	1.81333	0.612039	0.00906901	0.00320084	0.00417132	0.00176119	0.00655005	0.00284652	0.00538771	0.00140108
cg00014104	chr22	22220367	N_Shore	MAPK1;MAPK1	Body;Body	4	-0.00724428	0.00141016	2.78859e-07	-0.00724428	0.00141016	2.78859e-07	0	0	0.265115	0.96645	-0.00800654	0.00344712	-0.00725289	0.00256196	-0.00896153	0.00404939	-0.00653607	0.00194526
cg11854073	chr3	112013357	OpenSea	SLC9A10	TSS1500	2	0.0183613	0.00357716	2.85273e-07	0.0183613	0.00357716	2.85273e-07	0	0	0.5711	0.449822	0.0164479	0.0041864			0.0220787	0.00548539
cg09022230	chr7	5457225	N_Shore	TNRC18	Body	4	-0.0079021	0.00156341	4.31736e-07	-0.0079021	0.00156341	4.31736e-07	0	0	2.70821	0.438833	-0.0140732	0.00408476	-0.00542547	0.00303702	-0.00836991	0.00490043	-0.00728747	0.00201713
cg11621113	chr19	12776725	N_Shore	MORG1;MORG1;MAN2B1	TSS1500;TSS1500;Body	4	-0.00597932	0.00112594	1.09312e-07	-0.0060691	0.00121812	6.28216e-07	0.000771696	0	1.92108	0.588948	-0.0067019	0.00355906	-0.00773524	0.00197723	-0.0078356	0.00323402	-0.00443755	0.00148897
cg02577773	chr2	208027870	N_Shelf	KLF7	Body	4	-0.00924877	0.00185777	6.4106e-07	-0.00924877	0.00185777	6.4106e-07	0	0.440611	5.363	0.147067	-0.0111806	0.0041593	-0.0128316	0.00327609	0.00304295	0.00550979	-0.00841247	0.00267742
cg24069602	chr17	62045522	OpenSea	SCN4A	Body	4	0.00462355	0.000931732	6.96559e-07	0.00462355	0.000931732	6.96559e-07	0	0	1.35343	0.716486	0.0038374	0.00258245	0.00652213	0.00178951	0.00475953	0.00270089	0.00398985	0.00120668
cg27207470	chr11	111848326	Island	DIXDC1;DIXDC1;DIXDC1	1stExon;5'UTR;Body	3	0.0120612	0.00245008	8.53245e-07	0.0120612	0.00245008	8.53245e-07	0	0	1.201	0.548538	0.0143586	0.00403199	0.0093106	0.00339236	0.0148838	0.00494357
cg06934654	chr16	89180742	OpenSea	ACSF3;ACSF3;ACSF3	Body;Body;Body	4	0.00375319	0.000763027	8.70692e-07	0.00375319	0.000763027	8.70692e-07	0	0	0.681162	0.877626	0.00505481	0.00251177	0.00301077	0.00135081	0.00477886	0.00262668	0.00387744	0.000971799
cg18096987	chr3	11623873	OpenSea	VGLL4;VGLL4;VGLL4	Body;TSS200;Body	4	-0.00549674	0.00111847	8.90075e-07	-0.00549674	0.00111847	8.90075e-07	0	0	0.947591	0.81393	-0.00514314	0.00359432	-0.00393348	0.00189845	-0.00696221	0.00333193	-0.00616935	0.00149483
cg06800849	chr16	89180587	OpenSea	ACSF3;ACSF3;ACSF3	Body;Body;Body	4	0.00497539	0.00102342	1.16476e-06	0.00497539	0.00102342	1.16476e-06	0	0	0.707814	0.871364	0.00663708	0.00308525	0.00372466	0.00195833	0.00553261	0.00368328	0.00523317	0.00126903
cg15169121	chr2	177534417	OpenSea			4	0.0081361	0.00169975	1.69599e-06	0.0081361	0.00169975	1.69599e-06	0	0	1.90574	0.592198	0.00250092	0.00423754	0.00890693	0.00280111	0.00912479	0.00418724	0.00943195	0.00259227
cg22356061	chr1	227954102	OpenSea	SNAP47	Body	4	-0.00738195	0.0011674	2.55804e-10	-0.00825827	0.00173638	1.97446e-06	0.00224421	0.532482	6.41687	0.0929993	-0.00857247	0.00332378	-0.0118815	0.00237003	-0.0102865	0.00346245	-0.00491951	0.00146408
cg03172931	chr19	8677774	S_Shelf			4	-0.00525453	0.00110598	2.02415e-06	-0.00525453	0.00110598	2.02415e-06	0	0	0.316885	0.956822	-0.00641409	0.00265489	-0.00440124	0.00203105	-0.00522396	0.00326124	-0.00525945	0.00151765
cg11067407	chr11	113599852	OpenSea			4	0.00505488	0.00106631	2.13149e-06	0.00505488	0.00106631	2.13149e-06	0	0	0.950677	0.813184	0.0064646	0.00260486	0.00495992	0.00198719	0.00212053	0.00312421	0.00529857	0.00144535
cg13675015	chr6	43217925	S_Shelf	TTBK1	Body	4	0.00508667	0.0010756	2.25467e-06	0.00508667	0.0010756	2.25467e-06	0	0	0.555294	0.906586	0.00476193	0.00286919	0.00453881	0.00214709	0.00750567	0.00320442	0.00508089	0.00137581
cg05439665	chr13	113656424	S_Shore	MCF2L;MCF2L	Body;Body	4	-0.00869434	0.00184898	2.57311e-06	-0.00869434	0.00184898	2.57311e-06	0	0	2.17495	0.536899	-0.0137528	0.0047851	-0.0059812	0.00303026	-0.00529171	0.00557258	-0.00969096	0.00265605
cg08587504	chr20	34639686	S_Shore	LOC647979	TSS1500	4	0.0042216	0.000905699	3.14444e-06	0.0042216	0.000905699	3.14444e-06	0	0	0.522335	0.913958	0.0036363	0.00226925	0.00514186	0.00166659	0.00260544	0.00302374	0.00420639	0.00120143
cg02615735	chr6	31648276	N_Shore	LY6G5C	TSS200	4	-0.00749457	0.00160869	3.1806e-06	-0.00749457	0.00160869	3.1806e-06	0	0	1.70466	0.635898	-0.00882476	0.00317624	-0.00937092	0.00254249	-0.00570171	0.00365063	-0.00445762	0.00305583
cg13555415	chr9	134454249	OpenSea	RAPGEF1;RAPGEF1	3'UTR;3'UTR	4	0.00252238	0.000544864	3.66763e-06	0.00252238	0.000544864	3.66763e-06	0	0	0.657775	0.883088	0.0025019	0.00229603	0.00307095	0.00161996	0.00490241	0.00300114	0.00241213	0.000574177
cg15852826	chr6	31528915	OpenSea			4	0.00458523	0.000993962	3.96739e-06	0.00458523	0.000993962	3.96739e-06	0	0	2.78888	0.425333	0.00900616	0.00291402	0.00463128	0.00187954	0.00568946	0.00306444	0.00363815	0.00126905
cg10498926	chr2	75146391	N_Shore			4	-0.00175844	0.000382229	4.21501e-06	-0.00175844	0.000382229	4.21501e-06	0	0	2.46778	0.481142	-0.00117754	0.00184606	-0.00257708	0.0012382	-0.0048962	0.00204537	-0.0015793	0.000396372
cg24935896	chr1	201431492	OpenSea			4	0.00467887	0.00102895	5.43555e-06	0.00467887	0.00102895	5.43555e-06	0	0	1.28119	0.733603	0.00332243	0.00296331	0.00376636	0.00177751	0.00745558	0.00282671	0.00504736	0.00141218
cg17326313	chr2	37383568	N_Shore	EIF2AK2;EIF2AK2	5'UTR;5'UTR	3	0.00573483	0.0012646	5.76376e-06	0.00573483	0.0012646	5.76376e-06	0	0	1.56041	0.458313	0.00741493	0.00271122	0.00621746	0.00154577	0.00265914	0.00251747
cg17206772	chr11	115765072	OpenSea			4	0.00774711	0.00170871	5.79086e-06	0.00774711	0.00170871	5.79086e-06	0	0	0.949861	0.813382	0.00552037	0.00454646	0.00750189	0.00337675	0.00387459	0.00513388	0.00910636	0.00219305
cg10848272	chr14	70653719	N_Shore	SLC8A3;SLC8A3;SLC8A3;SLC8A3	5'UTR;5'UTR;5'UTR;5'UTR	4	0.00209053	0.000461471	5.8943e-06	0.00209053	0.000461471	5.8943e-06	0	0	0.948708	0.81366	0.00122927	0.00124355	0.00285961	0.0011751	0.00136768	0.00164498	0.00218863	0.000536819
cg06872964	chr1	79085250	OpenSea	IFI44L	TSS1500	3	0.0126364	0.00279261	6.0412e-06	0.0126364	0.00279261	6.0412e-06	0	0	1.42294	0.490923	0.0116457	0.00483077	0.010345	0.00392366	0.0183996	0.00506762
cg27272677	chr10	102891080	Island	TLX1NB;TLX1;TLX1	TSS200;5'UTR;1stExon	3	0.00455111	0.00100594	6.06172e-06	0.00455111	0.00100594	6.06172e-06	0	0	0.351137	0.83898	0.0052456	0.00209442	0.00475259	0.00128662	0.00351736	0.00182535
cg01678084	chr15	67022087	OpenSea	SMAD6;SMAD6;SMAD6	Body;Body;Body	4	0.00446196	0.000986581	6.10704e-06	0.00446196	0.000986581	6.10704e-06	0	0	1.88709	0.596169	0.00396638	0.00282263	0.00386334	0.00167832	0.00880238	0.00299008	0.00428342	0.00134344
cg27180443	chr12	125348871	S_Shore	SCARB1;SCARB1	TSS1500;TSS1500	3	0.00574092	0.00127444	6.64745e-06	0.00574092	0.00127444	6.64745e-06	0	0	0.26792	0.874625	0.00473663	0.00223826	0.00613301	0.00166953	0.00633108	0.00266994
cg00153693	chr15	93249643	OpenSea			4	0.00820873	0.00182434	6.80937e-06	0.00820873	0.00182434	6.80937e-06	0	0	0.536834	0.910728	0.010899	0.00450129	0.00873519	0.00341444	0.00851933	0.00500334	0.00718914	0.00249224
cg25961099	chr11	2322050	OpenSea	C11orf21;TSPAN32;C11orf21	Body;TSS1500;Body	4	-0.00359377	0.000804126	7.85279e-06	-0.00359377	0.000804126	7.85279e-06	0	0	1.81604	0.61145	-0.00178026	0.00231946	-0.00321902	0.00119424	-0.00626042	0.00214857	-0.0036675	0.00125931
cg01596292	chr8	101315505	OpenSea	RNF19A;RNF19A	5'UTR;TSS200	3	0.00844125	0.00189176	8.11556e-06	0.00844125	0.00189176	8.11556e-06	0	0	1.81006	0.404531	0.0131547	0.00380707			0.00674795	0.00372134	0.00727742	0.0023883
cg21934230	chr1	228202608	OpenSea	WNT3A	Body	4	-0.00890869	0.00195496	5.18957e-06	-0.00892744	0.00200429	8.42185e-06	0.000819511	0.0659644	3.21187	0.360098	-0.0155014	0.00400596	-0.00672896	0.00318386	-0.00622716	0.00557351	-0.0074496	0.00317197
cg26121234	chr3	13899618	S_Shelf	WNT7A	Body	4	0.00527577	0.00118463	8.44813e-06	0.00527577	0.00118463	8.44813e-06	0	0	0.199104	0.977734	0.00559735	0.00331224	0.00475038	0.00219586	0.00424378	0.00334477	0.00575641	0.00156472
cg14780632	chr11	65816521	Island	GAL3ST3;GAL3ST3	5'UTR;1stExon	4	0.00335167	0.000752837	8.50535e-06	0.00335167	0.000752837	8.50535e-06	0	0	1.18147	0.757453	0.00315909	0.00286138	0.00207558	0.00190704	0.000666645	0.00323742	0.00380333	0.000827772
cg26579578	chr11	69707303	S_Shore			3	0.00457252	0.00103081	9.17117e-06	0.00457252	0.00103081	9.17117e-06	0	0	0.894018	0.639538	0.00618619	0.00215134	0.00448653	0.00124992	0.0030383	0.00216872
cg25697726	chrX	56589918	N_Shore	UBQLN2	TSS200	2	-0.0109515	0.00247378	9.55466e-06	-0.0109515	0.00247378	9.55466e-06	0	0	0.292575	0.588575	-0.0138101	0.00557441			-0.0103699	0.0024199
cg19103429	chr7	92460784	N_Shore	CDK6;CDK6	Body;Body	3	-0.00786124	0.00177862	9.87692e-06	-0.00786124	0.00177862	9.87692e-06	0	0	0.297901	0.861612	-0.00937644	0.00395882	-0.00706481	0.00213547	-0.00889241	0.00361143
cg19507068	chr7	79764176	Island	GNAI1;GNAI1	1stExon;5'UTR	4	0.00417138	0.000943967	9.9163e-06	0.00417138	0.000943967	9.9163e-06	0	0	2.37564	0.498185	0.00592448	0.00230867	0.00451172	0.0017497	0.00791877	0.00327124	0.00309056	0.00125012
cg01556466	chr7	31146260	OpenSea	ADCYAP1R1	Body	4	0.00465595	0.00105755	1.06973e-05	0.00465595	0.00105755	1.06973e-05	0	0	0.30476	0.959131	0.00432861	0.0035427	0.00571881	0.00205634	0.00381777	0.00312846	0.00447663	0.00131384
cg18618815	chr17	48275324	N_Shore	COL1A1	Body	4	0.006254	0.00143652	1.33939e-05	0.006254	0.00143652	1.33939e-05	0	0	2.07025	0.557955	0.00166044	0.00340562	0.0067255	0.00254753	0.00799544	0.00344789	0.00728394	0.00212959
cg11743675	chr12	41221855	OpenSea	CNTN1;CNTN1	5'UTR;5'UTR	4	-0.010902	0.00251602	1.47075e-05	-0.010902	0.00251602	1.47075e-05	0	0	0.550427	0.907681	-0.0132065	0.00562195	-0.0120547	0.00439779	-0.0128228	0.00863007	-0.00872279	0.00355928
cg03419948	chr22	37962022	N_Shore	CDC42EP1	5'UTR	4	-0.00653026	0.00150857	1.49952e-05	-0.00653026	0.00150857	1.49952e-05	0	0	1.64365	0.649534	-0.0100073	0.00412888	-0.00635775	0.00293368	-0.0116076	0.00553357	-0.00524917	0.00188874
cg04168670	chr2	124782817	Island	CNTNAP5	TSS200	4	0.00285167	0.000658815	1.50136e-05	0.00285167	0.000658815	1.50136e-05	0	0	1.66339	0.645102	0.00526926	0.00199443	0.00213525	0.00142912	0.00323798	0.00256736	0.00270915	0.000775878
cg17389988	chr7	40740924	OpenSea	C7orf10	Body	4	0.0060131	0.00139194	1.56079e-05	0.0060131	0.00139194	1.56079e-05	0	0	2.19323	0.533282	0.00898385	0.00415186	0.00314137	0.0025489	0.00424928	0.00408245	0.00729225	0.00181287
cg26262049	chr11	10628012	OpenSea	MRVI1;MRVI1;MRVI1;MRVI1	Body;Body;Body;Body	3	0.00626243	0.00144745	1.51477e-05	0.00626341	0.00145053	1.57434e-05	0.000137242	0	1.60957	0.447183	0.00392334	0.00332167	0.00591076	0.00171848	0.00973111	0.00296454
cg13709487	chr3	100322493	OpenSea			4	0.00665053	0.00154285	1.62859e-05	0.00665053	0.00154285	1.62859e-05	0	0	2.10541	0.55082	0.00781115	0.00434224	0.0079107	0.0026169	0.0122136	0.00484105	0.00480582	0.00210059
cg12392104	chr15	55665153	OpenSea	CCPG1;MIR628;CCPG1	Body;Body;Body	4	0.00445989	0.00103414	1.61304e-05	0.00446055	0.00103486	1.63025e-05	6.74987e-05	0	2.65294	0.448284	0.00879704	0.00277686	0.00421278	0.00175936	0.00422826	0.00270018	0.00355538	0.00147698
cg03882777	chr6	33160965	Island	COL11A2;COL11A2;COL11A2;COL11A2	TSS1500;TSS1500;TSS1500;TSS1500	4	0.000716848	0.000166452	1.65763e-05	0.000716848	0.000166452	1.65763e-05	0	0	0.0491575	0.997144	0.000633089	0.00123876	0.000548953	0.000969215	0.000831695	0.00138332	0.000730054	0.000163421
cg14327296	chr14	101051064	N_Shelf			4	0.00373512	0.000867699	1.67272e-05	0.00373512	0.000867699	1.67272e-05	0	0	0.869702	0.832733	0.00417734	0.00273511	0.00417462	0.00153493	0.00565591	0.0024937	0.00313877	0.00114326
cg20107346	chr12	88803163	OpenSea			4	0.00395605	0.000920146	1.71283e-05	0.00395605	0.000920146	1.71283e-05	0	0	2.69013	0.441907	0.00705236	0.00244862	0.00505524	0.00177382	0.00180744	0.00299461	0.00311362	0.00117975
cg11926764	chr11	92930916	Island	SLC36A4	Body	4	0.00112742	0.000262957	1.80723e-05	0.00112742	0.000262957	1.80723e-05	0	0	0.394121	0.941454	0.00171758	0.00131465	0.00148337	0.00101169	0.000642383	0.00127072	0.00111058	0.000269306
cg26628795	chr2	111435723	Island	BUB1	TSS200	4	-0.002413	0.000563302	1.83837e-05	-0.002413	0.000563302	1.83837e-05	0	0	1.03194	0.793525	-0.00172356	0.00132066	-0.00278727	0.000833985	-0.00104643	0.00169947	-0.00258158	0.000927129
cg10633609	chr4	190705649	OpenSea			4	0.00440825	0.00102914	1.84031e-05	0.00440825	0.00102914	1.84031e-05	0	0	1.49793	0.682749	0.00332054	0.00285642	0.00265492	0.00193018	0.00456941	0.00311386	0.00553493	0.00133763
cg06501716	chr22	19436948	S_Shore	C22orf39;C22orf39	TSS1500;TSS1500	4	0.00423294	0.00099001	1.90574e-05	0.00423294	0.00099001	1.90574e-05	0	0	1.74368	0.627267	0.00110852	0.00294683	0.00443021	0.00192233	0.00724357	0.00323756	0.00439845	0.00123627
cg01973676	chr7	101596404	OpenSea	CUX1;CUX1;CUX1	Body;Body;Body	4	0.00671971	0.00140327	1.67934e-06	0.00673906	0.00157685	1.92218e-05	0.00114297	0	2.61925	0.454125	0.0124329	0.00444295	0.00663643	0.00272114	0.00139719	0.00441972	0.00668968	0.001744
cg15108641	chr10	99263320	S_Shelf	UBTD1	Body	4	0.00579743	0.00135944	2.0028e-05	0.00579743	0.00135944	2.0028e-05	0	0	0.374184	0.945522	0.00581641	0.00430225	0.00621929	0.00243837	0.00797097	0.00393308	0.0053	0.00177457
cg05826817	chrX	23760460	N_Shore	ACOT9;ACOT9	Body;Body	2	-0.0178256	0.00418315	2.03269e-05	-0.0178256	0.00418315	2.03269e-05	0	0	0.285766	0.592946	-0.0158222	0.0053644			-0.0204247	0.0055548
cg27128761	chr5	151055650	OpenSea	SPARC	Body	4	0.00447936	0.00105125	2.03515e-05	0.00447936	0.00105125	2.03515e-05	0	0	0.630764	0.889355	0.00557543	0.00256518	0.00392993	0.00181143	0.0024266	0.00321489	0.00494544	0.00148107
cg01418188	chr11	3145609	S_Shelf	OSBPL5;OSBPL5;OSBPL5	Body;Body;Body	4	0.00342967	0.000805547	2.06662e-05	0.00342967	0.000805547	2.06662e-05	0	0	2.04054	0.564035	0.00116782	0.00225652	0.00281003	0.00122095	0.00413925	0.00210191	0.00464159	0.00125422
cg19593285	chr20	32267661	S_Shelf	E2F1	Body	3	0.00490337	0.00115187	2.07318e-05	0.00490337	0.00115187	2.07318e-05	0	0	1.26816	0.530422	0.00208562	0.00267978			0.00610324	0.00281068	0.00541078	0.00131477
cg04588708	chr16	811078	OpenSea	MSLN;MSLN	TSS200;TSS200	4	0.00411126	0.0009659	2.07744e-05	0.00411126	0.0009659	2.07744e-05	0	0	0.546805	0.908495	0.00382622	0.00307314	0.00527452	0.00173384	0.0030946	0.0030543	0.00378843	0.00124165
cg17166812	chr1	161169574	N_Shelf	NDUFS2;ADAMTS4	5'UTR;TSS1500	4	0.00359113	0.000844185	2.10024e-05	0.00359113	0.000844185	2.10024e-05	0	0	0.239585	0.970959	0.00273677	0.00242374	0.00340905	0.0012989	0.00411964	0.00189368	0.00391032	0.00135746
cg10058464	chr4	81257211	Island	C4orf22	Body	4	0.00123109	0.000290166	2.2085e-05	0.00123109	0.000290166	2.2085e-05	0	0	1.76591	0.622382	0.00306618	0.0014491	0.00146019	0.00105665	0.00179213	0.00142751	0.00112996	0.000298199
cg22717593	chr19	45647012	N_Shore			4	0.00352039	0.000830052	2.22362e-05	0.00352039	0.000830052	2.22362e-05	0	0	0.868716	0.83297	0.00414606	0.00238092	0.00357723	0.00165016	0.00575444	0.00254294	0.00311561	0.00104292
cg21142272	chr16	67224341	OpenSea	EXOC3L	TSS1500	4	0.00353657	0.000834664	2.26404e-05	0.00353657	0.000834664	2.26404e-05	0	0	1.25245	0.740455	0.00551557	0.00239601	0.00449441	0.00187052	0.00193995	0.00270243	0.00316595	0.00100007
cg07918509	chr17	62083407	OpenSea	ICAM2;ICAM2;ICAM2;ICAM2;ICAM2	Body;Body;Body;Body;Body	4	-0.00412302	0.000974228	2.31531e-05	-0.00412302	0.000974228	2.31531e-05	0	0	1.82275	0.609998	-0.00791557	0.00313069	-0.00484357	0.00224948	-0.00466689	0.00393306	-0.00336317	0.00111616
cg24158157	chr10	124581726	S_Shelf			3	0.00693884	0.00164159	2.36917e-05	0.00693884	0.00164159	2.36917e-05	0	0	0.0141369	0.992956	0.0073335	0.00355169	0.00690966	0.00200329	0.006743	0.00325472
cg03059896	chr1	27560050	N_Shore	WDTC1	TSS1500	4	-0.00351157	0.000803619	1.2442e-05	-0.00351992	0.00083406	2.44056e-05	0.000321148	0	1.98477	0.575574	-0.00324721	0.0024662	-0.00248365	0.00181552	-0.00800117	0.0030077	-0.00339149	0.00093699
cg25165932	chr12	109025846	OpenSea	SELPLG	5'UTR	4	-0.00144353	0.000343186	2.59626e-05	-0.00144353	0.000343186	2.59626e-05	0	0	0.469565	0.925525	-0.0019997	0.00109251	-0.00116003	0.000606383	-0.00124727	0.00112718	-0.00150022	0.000442421
cg16293569	chr11	2870208	N_Shore	KCNQ1;KCNQ1	3'UTR;3'UTR	4	0.00378373	0.000899572	2.59769e-05	0.00378373	0.000899572	2.59769e-05	0	0	0.791651	0.851463	0.00205377	0.00245529	0.00430863	0.00140442	0.0025782	0.00252876	0.00420853	0.00134405
cg20985755	chr3	24536474	Island	THRB;THRB;THRB	TSS200;TSS200;TSS1500	4	0.00482801	0.00114785	2.5978e-05	0.00482801	0.00114785	2.5978e-05	0	0	1.62157	0.654509	0.00924988	0.00357473	0.00501547	0.00247845	0.00465077	0.00358385	0.0042141	0.00137843
cg10378735	chr7	142558305	OpenSea	EPHB6	5'UTR	4	-0.0011451	0.000272678	2.67543e-05	-0.0011451	0.000272678	2.67543e-05	0	0	0.674618	0.879157	-0.0022976	0.00216678	-0.00157218	0.00169808	-0.00278706	0.00249497	-0.00108737	0.000266676
cg16793274	chr4	183714372	OpenSea	ODZ3	Body	4	-0.00159617	0.000380179	2.68744e-05	-0.00159617	0.000380179	2.68744e-05	0	0	0.767656	0.857187	-0.000861411	0.00178605	-0.00142566	0.00139974	-0.00355973	0.00219087	-0.00156998	0.000389462
cg22768222	chr6	45383690	N_Shelf	RUNX2;RUNX2	Body;Body	4	0.00744697	0.00177582	2.7464e-05	0.00744697	0.00177582	2.7464e-05	0	0	0.259986	0.96737	0.00802903	0.00417714	0.00817906	0.00277284	0.00807206	0.00443557	0.00632716	0.00290971
cg25306087	chr17	72920362	Island	OTOP2;USH1G	TSS200;TSS1500	4	0.000915377	0.000218552	2.80967e-05	0.000915377	0.000218552	2.80967e-05	0	0	2.54482	0.467246	0.00157651	0.00138888	0.000824544	0.000787707	0.00301563	0.00125664	0.000861083	0.000221886
cg22221870	chr21	42688675	N_Shore	FAM3B;FAM3B;FAM3B;FAM3B	1stExon;5'UTR;1stExon;5'UTR	4	0.00136366	0.000325732	2.83372e-05	0.00136366	0.000325732	2.83372e-05	0	0	0.797414	0.850085	0.00260303	0.00207606	0.00218988	0.00125017	0.00163293	0.00154842	0.00128148	0.0003312
cg09200921	chr13	49867061	OpenSea	CDADC1	3'UTR	4	-0.00463275	0.00110781	2.89089e-05	-0.00463275	0.00110781	2.89089e-05	0	0	1.26804	0.736736	-0.00339166	0.00350482	-0.0046383	0.00175015	-0.00795072	0.00288884	-0.00390049	0.00160878
cg09333580	chr20	31606541	OpenSea	BPIL1	Body	4	-0.00475878	0.00114046	3.01029e-05	-0.00475878	0.00114046	3.01029e-05	0	0	1.51415	0.67901	-0.00777176	0.00304137	-0.00515667	0.00208105	-0.00577505	0.00348022	-0.00354375	0.00151477
cg13519373	chr2	219030898	OpenSea	CXCR1	5'UTR	4	0.0036725	0.000880181	3.01363e-05	0.0036725	0.000880181	3.01363e-05	0	0	2.04298	0.563534	0.00432749	0.00245132	0.00109591	0.00193851	0.00450009	0.00321256	0.00428726	0.00105238
cg08035195	chr2	161262014	N_Shore	RBMS1;RBMS1	Body;Body	4	-0.00333278	0.000798865	3.02074e-05	-0.00333278	0.000798865	3.02074e-05	0	0	0.968807	0.808799	-0.00548922	0.00237647	-0.00292617	0.00176124	-0.00419629	0.00270523	-0.00295769	0.000951144
cg07708016	chr15	30511386	N_Shelf			2	0.0111866	0.00268353	3.06456e-05	0.0111866	0.00268353	3.06456e-05	0	0	0.672756	0.412092	0.00962438	0.00314348			0.0142115	0.00410749
cg19856897	chr7	142495846	S_Shore			4	-0.0125033	0.00250396	5.93278e-07	-0.0132903	0.00318889	3.07704e-05	0.00357328	0.290914	4.2308	0.237596	-0.0179896	0.0064406	-0.0138595	0.00399799	-0.0228424	0.00726808	-0.00696516	0.00370957
cg14426167	chr17	27972099	OpenSea	SSH2	Body	4	0.00461147	0.00110847	3.17937e-05	0.00461147	0.00110847	3.17937e-05	0	0	2.48381	0.478223	0.00250923	0.00307339	0.00598522	0.00188473	0.0086162	0.00333839	0.00361904	0.00152282
cg02419321	chr12	54811762	N_Shore	ITGA5	Body	4	-0.00450664	0.00108081	3.04998e-05	-0.00450946	0.00108702	3.34712e-05	0.00019782	0	2.5061	0.47419	-0.00225987	0.00367178	-0.00445837	0.00159108	-0.00898833	0.00282631	-0.00358436	0.00165197
cg23068772	chr7	30737061	OpenSea			4	-0.0067988	0.00147052	3.77501e-06	-0.00704472	0.00170292	3.52096e-05	0.00139017	0	2.85866	0.413934	-0.0118862	0.00426499	-0.00907429	0.002817	-0.00439483	0.00498107	-0.00504864	0.00184749
cg07600998	chr1	147146108	S_Shelf			4	0.00443529	0.000802611	3.2746e-08	0.00450434	0.00108935	3.55111e-05	0.00134813	0.112679	3.38096	0.336532	0.00498519	0.00220057	0.00642142	0.00133815	0.0035459	0.002095	0.00312211	0.00115638
cg13408086	chr9	140221397	S_Shelf	EXD3	Body	4	0.00371745	0.000900703	3.67091e-05	0.00371745	0.000900703	3.67091e-05	0	0	1.77986	0.619327	0.00471514	0.0033725	0.00669583	0.00249828	0.00116453	0.00380259	0.00338156	0.000977601
cg13961576	chr10	1228316	N_Shelf	ADARB2	3'UTR	3	0.00599889	0.00145629	3.80042e-05	0.00599889	0.00145629	3.80042e-05	0	0	0.273628	0.872132	0.00577738	0.00261979	0.00564486	0.00186622	0.00762075	0.00313801
cg04600000	chr13	114830313	OpenSea	RASA3	Body	4	-0.00531518	0.00129071	3.82101e-05	-0.00531518	0.00129071	3.82101e-05	0	0	0.319097	0.956398	-0.0062197	0.00273511	-0.00558222	0.00181013	-0.00448527	0.0031232	-0.00415819	0.0027258
cg18016128	chr17	16396497	S_Shore	C17orf76;C17orf76	TSS1500;TSS1500	4	0.00397197	0.000965027	3.85639e-05	0.00397197	0.000965027	3.85639e-05	0	0	1.48784	0.685079	0.00446405	0.00254158	0.00329348	0.00180148	0.000621281	0.00294973	0.00479515	0.00127064
cg06321596	chr16	17562960	OpenSea	XYLT1	Body	4	-0.00811199	0.00197157	3.88059e-05	-0.00811199	0.00197157	3.88059e-05	0	0	0.347528	0.950855	-0.00971266	0.00479355	-0.00806142	0.00317029	-0.00534944	0.00514377	-0.00814852	0.00304681
cg06191091	chr17	30583855	OpenSea			4	0.00345404	0.00083973	3.90086e-05	0.00345404	0.00083973	3.90086e-05	0	0	0.343751	0.951601	0.00430517	0.00267752	0.00409092	0.00156082	0.00320178	0.00265209	0.00312775	0.0010613
cg00799387	chr3	32827142	S_Shelf			2	0.0174406	0.00351339	6.90409e-07	0.0177619	0.00431938	3.92024e-05	0.00349065	0.318476	1.4673	0.225772	0.0140758	0.0042784			0.0227302	0.00501871
cg21692620	chr17	40835849	Island	CNTNAP1	Body	3	-0.0137402	0.00334208	3.93499e-05	-0.0137402	0.00334208	3.93499e-05	0	0	1.02754	0.598237	-0.018687	0.00571141	-0.0109825	0.00436343	-0.0129436	0.00743342
cg01717524	chr1	120204880	OpenSea			4	0.00407736	0.000992086	3.95852e-05	0.00407736	0.000992086	3.95852e-05	0	0	1.05189	0.7887	0.0065431	0.00257217	0.00383201	0.00167247	0.00274105	0.00292866	0.00386731	0.00140113
cg01142735	chr8	103932076	OpenSea			4	0.00413687	0.00095431	1.45806e-05	0.00410358	0.000999147	4.00689e-05	0.00052665	0.111335	3.37585	0.337224	0.00504396	0.00233554	0.004675	0.0015425	-0.00140729	0.00278962	0.00468068	0.00142162
cg24587175	chr10	105670608	OpenSea	OBFC1	Body	4	-0.00348261	0.000847997	4.01072e-05	-0.00348261	0.000847997	4.01072e-05	0	0	0.73367	0.865257	-0.00512266	0.00268894	-0.00332555	0.0018001	-0.00506085	0.00267744	-0.00304044	0.00101962
cg04876835	chr1	57111099	Island	PRKAA2	1stExon	3	0.0061108	0.00148815	4.02015e-05	0.0061108	0.00148815	4.02015e-05	0	0	0.237589	0.88799	0.00538914	0.0027592	0.00592116	0.00205528	0.00723505	0.00257619
cg14523734	chr7	128020864	OpenSea			4	0.00355029	0.000864614	4.02195e-05	0.00355029	0.000864614	4.02195e-05	0	0	0.0756294	0.994592	0.00406618	0.00246619	0.00350769	0.00151314	0.00387576	0.00237822	0.00346129	0.00117952
cg05609159	chr2	210187995	OpenSea			4	0.0083323	0.00197501	2.4554e-05	0.00828704	0.00201886	4.04655e-05	0.00073429	0	2.83378	0.417969	0.00941482	0.00475552	0.00733001	0.00359048	-0.000663123	0.00544131	0.0107161	0.00276088
cg15815084	chr17	54912870	S_Shore	DGKE	Body	4	-0.0114234	0.00278437	4.08385e-05	-0.0114234	0.00278437	4.08385e-05	0	0	2.50521	0.47435	-0.0161412	0.00703095	-0.00603101	0.00546921	-0.0214679	0.00792746	-0.0104702	0.0036638
cg24744697	chr11	6503801	S_Shore	ARFIP2;FXC1	TSS1500;3'UTR	4	-0.00336793	0.000798462	2.46454e-05	-0.00337279	0.000824152	4.26869e-05	0.000274895	0.0855719	3.28074	0.350332	-0.00375204	0.00259628	-0.00555981	0.00200942	0.00217486	0.00342113	-0.00316911	0.000893051
cg13940444	chr12	53617382	S_Shelf	RARG	Body	4	-0.00580232	0.00141788	4.27232e-05	-0.00580232	0.00141788	4.27232e-05	0	0	2.11062	0.549768	-0.00142143	0.00355503	-0.00703134	0.0021843	-0.0085196	0.00378608	-0.00529676	0.00224094
cg25608041	chr4	37891834	Island	TBC1D1	TSS1500	4	0.004557	0.00111368	4.27972e-05	0.004557	0.00111368	4.27972e-05	0	0	1.75229	0.625372	0.00703251	0.00335823	0.00622959	0.00198604	0.00347539	0.00315284	0.00345708	0.00147696
cg05119988	chr4	166251189	S_Shelf	SC4MOL;SC4MOL	5'UTR;5'UTR	4	-0.00735953	0.00180094	4.37929e-05	-0.00735953	0.00180094	4.37929e-05	0	0	1.96377	0.579961	-0.0104593	0.00496554	-0.00741078	0.00342271	-0.000189343	0.00515607	-0.00778382	0.0023515
cg08029287	chr4	1503238	N_Shelf			4	0.00432662	0.00103446	2.88346e-05	0.00434012	0.00106434	4.54747e-05	0.000424528	0	2.71295	0.438031	0.00160579	0.00275139	0.0050747	0.00195904	0.00822445	0.00277633	0.00389595	0.00138202
cg07970325	chr6	106497542	OpenSea			4	0.00371402	0.000911284	4.58974e-05	0.00371402	0.000911284	4.58974e-05	0	0	1.67935	0.641535	0.00608089	0.00267762	0.00473619	0.00169409	0.00159263	0.00283223	0.00316107	0.00117079
cg17130481	chr20	853509	OpenSea	ANGPT4	3'UTR	4	0.00330118	0.000810026	4.59352e-05	0.00330118	0.000810026	4.59352e-05	0	0	1.82304	0.609934	0.00417243	0.00249336	0.00162112	0.00145938	0.00313435	0.00246268	0.00409893	0.00105137
cg00860090	chr1	226832000	S_Shelf	ITPKB	Body	4	0.00270583	0.000664062	4.60813e-05	0.00270583	0.000664062	4.60813e-05	0	0	0.665708	0.881238	0.00358679	0.0022562	0.00234574	0.00112379	0.00383614	0.00167057	0.00256188	0.000913055
cg02964474	chr17	1958002	Island	HIC1	TSS1500	4	-0.00143552	0.000352738	4.70846e-05	-0.00143552	0.000352738	4.70846e-05	0	0	1.6452	0.649184	-0.000210799	0.00112296	-0.00179492	0.000558742	-0.0010836	0.0008584	-0.00146876	0.000520803
cg18143317	chr11	2037124	S_Shelf			4	0.00408622	0.00100805	5.04422e-05	0.00408622	0.00100805	5.04422e-05	0	0	1.41387	0.702286	0.00135597	0.00325501	0.00332059	0.00177548	0.00340041	0.00284117	0.00517928	0.00133069
cg06036471	chr10	93861385	OpenSea	CPEB3	Body	4	0.00459863	0.00111749	3.86932e-05	0.0046023	0.00113852	5.29194e-05	0.000402958	0.0425999	3.13349	0.371499	0.00731209	0.00267081	0.00314758	0.00172363	0.00174334	0.00268414	0.00627512	0.00187069
cg12067423	chr15	85141633	N_Shelf			4	-0.00272205	0.000673389	5.29247e-05	-0.00272205	0.000673389	5.29247e-05	0	0	0.779689	0.854319	-0.00314741	0.00188303	-0.00216	0.001324	-0.00393392	0.00145776	-0.00241735	0.00092541
cg15278374	chr12	131576088	S_Shelf	GPR133	Body	4	0.00469205	0.00116135	5.34122e-05	0.00469205	0.00116135	5.34122e-05	0	0	0.19537	0.978333	0.00551001	0.00333364	0.00446231	0.00211694	0.00326958	0.0036065	0.0049475	0.00151366
cg10896594	chr8	833183	S_Shore			3	0.00619854	0.00153457	5.36196e-05	0.00619854	0.00153457	5.36196e-05	0	0	0.000317425	0.999841	0.00615186	0.00295005	0.00626926	0.001954	0.00614715	0.00306289
cg16277071	chr17	75537317	OpenSea			4	0.00515754	0.00113822	5.86395e-06	0.00517362	0.00128172	5.42633e-05	0.000994942	0	2.72033	0.436783	0.00334915	0.00332143	0.00814324	0.00202512	0.00336355	0.00334497	0.00429585	0.00151106
cg05234415	chr19	38743744	N_Shelf	PPP1R14A	Body	4	-0.00524647	0.00130148	5.55055e-05	-0.00524647	0.00130148	5.55055e-05	0	0	0.670512	0.880117	-0.00783185	0.00336558	-0.00500219	0.0023647	-0.00549424	0.00362368	-0.00450245	0.00177648
cg25855001	chr17	2886346	OpenSea	RAP1GAP2;RAP1GAP2	Body;Body	2	0.00844928	0.00209805	5.6443e-05	0.00844928	0.00209805	5.6443e-05	0	0	0.477882	0.489383	0.00960377	0.00256133			0.00657178	0.00298498
cg04414295	chr14	102606318	Island	WDR20;WDR20;HSP90AA1;WDR20;WDR20;WDR20	1stExon;1stExon;TSS1500;5'UTR;1stExon;1stExon	4	-0.00146826	0.000366237	6.09614e-05	-0.00146826	0.000366237	6.09614e-05	0	0	1.04053	0.791446	-0.00138255	0.00117717	-0.00130661	0.000798073	0.000252695	0.00164218	-0.00159787	0.000423141
cg26189021	chr1	110757770	S_Shelf	KCNC4;KCNC4;KCNC4	Body;Body;Body	4	0.00419145	0.0010457	6.11668e-05	0.00419145	0.0010457	6.11668e-05	0	0	0.634155	0.888571	0.0069872	0.00351195	0.00411086	0.0018924	0.00376596	0.00337622	0.0039698	0.00132404
cg05696877	chr1	79088769	OpenSea	IFI44L	5'UTR	3	0.0159814	0.00394992	5.21005e-05	0.0160274	0.00399962	6.14354e-05	0.000940165	0.141719	2.33024	0.311886	0.0144697	0.00737657			0.0308883	0.00945972	0.0134453	0.00486211
cg01439383	chr7	2728776	S_Shore	AMZ1	5'UTR	4	-0.00543777	0.0013167	3.63e-05	-0.00543505	0.00135697	6.19423e-05	0.000535348	0.118475	3.40319	0.333537	0.000367225	0.00364929	-0.00720216	0.00256437	-0.00891538	0.00380434	-0.00523402	0.00169577
cg16794579	chr16	17562419	OpenSea	XYLT1	Body	4	-0.00542065	0.00135354	6.20694e-05	-0.00542065	0.00135354	6.20694e-05	0	0	1.70168	0.636559	-0.00707361	0.00422211	-0.00798329	0.0025296	-0.00437897	0.00379802	-0.00401705	0.00174495
cg05651778	chr17	60729731	Island	MRC2	Body	4	0.00152402	0.000381272	6.40977e-05	0.00152402	0.000381272	6.40977e-05	0	0	2.0875	0.554446	0.000746991	0.00140397	0.00301999	0.00108278	0.00093044	0.0017619	0.00142793	0.000411051
cg17130251	chr19	3945936	S_Shelf			3	0.00668891	0.00167342	6.41125e-05	0.00668891	0.00167342	6.41125e-05	0	0	0.608903	0.737528	0.00521155	0.0032279	0.00647778	0.00218344	0.00887264	0.00312429
cg10603136	chr8	121095224	OpenSea			4	0.00411914	0.00103086	6.44665e-05	0.00411914	0.00103086	6.44665e-05	0	0	1.7669	0.622164	0.00345275	0.00278306	0.00364911	0.0019879	0.00878842	0.00329986	0.00390983	0.00132013
cg01834210	chr5	153858967	Island	HAND1	TSS1500	4	0.000819078	0.000204991	6.45103e-05	0.000819078	0.000204991	6.45103e-05	0	0	0.592915	0.898052	0.000979125	0.00119788	0.00152502	0.000905126	0.00099637	0.00119531	0.000784432	0.000205839
cg18686527	chr17	27044685	Island	RAB34;RAB34;RAB34;RAB34;RAB34;RAB34;RAB34;RAB34;RAB34	Body;Body;5'UTR;Body;5'UTR;1stExon;Body;Body;1stExon	4	0.00410921	0.00102981	6.59985e-05	0.00410921	0.00102981	6.59985e-05	0	0	0.619188	0.892026	0.00469859	0.00274619	0.00361014	0.00183791	0.00649167	0.00315988	0.0039313	0.00138311
cg23598378	chr6	42072986	S_Shore	C6orf132	Body	4	-0.00619919	0.00155367	6.60684e-05	-0.00619919	0.00155367	6.60684e-05	0	0	0.473421	0.924691	-0.00640231	0.00434394	-0.00753766	0.00284408	-0.00375604	0.00479467	-0.00573223	0.00203399
cg01601926	chr16	8986308	OpenSea	USP7	3'UTR	4	0.00346853	0.000869693	6.65705e-05	0.00346853	0.000869693	6.65705e-05	0	0	2.46527	0.4816	0.006602	0.00222737	0.00349787	0.00156666	0.00398499	0.0025894	0.00255063	0.0011807
cg15970666	chr2	162095662	Island			4	0.00512479	0.00128544	6.69702e-05	0.00512479	0.00128544	6.69702e-05	0	0	1.40352	0.70471	0.00582398	0.00326674	0.00708831	0.00219797	0.00584047	0.00470898	0.00371965	0.0017498
cg15891991	chr1	117396695	OpenSea			4	0.00337227	0.00081346	3.38952e-05	0.00337324	0.000846497	6.74962e-05	0.000429554	0	2.46417	0.481801	0.000969614	0.00215318	0.00340361	0.00126813	0.00577224	0.00187801	0.00330879	0.00130986
cg07165167	chr1	86045527	N_Shore	CYR61;DDAH1	TSS1500;TSS1500	4	0.00572992	0.00143866	6.81066e-05	0.00572992	0.00143866	6.81066e-05	0	0	0.794783	0.850715	0.00818027	0.00382792	0.00432801	0.00244915	0.00479136	0.00388232	0.00634711	0.0020424
cg05612966	chr5	95583220	OpenSea			4	0.00335844	0.000843613	6.86214e-05	0.00335844	0.000843613	6.86214e-05	0	0	0.452953	0.929099	0.00292434	0.00245331	0.00390596	0.00162558	0.00467042	0.00247114	0.0030529	0.00107836
cg03649130	chr6	161456290	OpenSea	MAP3K4;MAP3K4	Body;Body	3	0.0102564	0.00257662	6.87508e-05	0.0102564	0.00257662	6.87508e-05	0	0	1.31134	0.519094	0.00770041	0.00483942	0.00930066	0.00340163	0.0155324	0.00482261
cg06771056	chr6	32805223	N_Shore	TAP2;TAP2	Body;Body	3	-0.00421043	0.0010582	6.92472e-05	-0.00421043	0.0010582	6.92472e-05	0	0	0.553506	0.758242	-0.00309979	0.00187587	-0.00439464	0.00137873	-0.00540076	0.00221876
cg17578380	chr5	130847962	OpenSea	RAPGEF6;RAPGEF6;RAPGEF6;RAPGEF6;RAPGEF6;RAPGEF6	Body;Body;Body;Body;Body;Body	4	-0.00110234	0.000277071	6.93442e-05	-0.00110234	0.000277071	6.93442e-05	0	0	1.15449	0.76394	-0.000535235	0.00159971	-0.000291718	0.00123389	0.000335311	0.00170028	-0.00117868	0.000277852
cg03353474	chr6	32133550	N_Shore	EGFL8	5'UTR	2	-0.00929748	0.00234022	7.10005e-05	-0.00929748	0.00234022	7.10005e-05	0	0	0.240554	0.623807	-0.0101254	0.0027565			-0.00777217	0.00354361
cg27312979	chr10	97094453	OpenSea	SORBS1;SORBS1;SORBS1;SORBS1;SORBS1;SORBS1;SORBS1	Body;Body;Body;Body;Body;Body;Body	4	-0.0111803	0.0028142	7.10268e-05	-0.0111803	0.0028142	7.10268e-05	0	0	2.52764	0.470317	-0.021357	0.00692554	-0.0100805	0.00463329	-0.0117552	0.00706455	-0.00774835	0.00429025
cg27343325	chr20	3649247	N_Shelf	ADAM33;ADAM33	3'UTR;3'UTR	4	0.00325887	0.000820338	7.10942e-05	0.00325887	0.000820338	7.10942e-05	0	0	1.17891	0.758067	0.00259514	0.00232226	0.00368408	0.00146767	0.00597109	0.00261961	0.00284574	0.00107831
cg06784436	chr15	75640497	Island	NEIL1	5'UTR	3	0.00314352	0.000791459	7.13303e-05	0.00314352	0.000791459	7.13303e-05	0	0	0.138121	0.93327	0.00333972	0.00163555	0.00332236	0.00101533	0.00259232	0.0014358
cg01979270	chr16	2589773	S_Shore	PDPK1;PDPK1	Body;Body	2	0.00850793	0.00212011	5.99601e-05	0.00851855	0.00214588	7.19562e-05	0.000457933	0.0216893	1.02217	0.312005	0.00679902	0.00259008			0.0111405	0.00301301
cg10717691	chr1	210426358	OpenSea			4	0.00279789	0.000705048	7.23688e-05	0.00279789	0.000705048	7.23688e-05	0	0	1.9019	0.593015	0.00537383	0.00241774	0.00368568	0.00147375	0.00330134	0.00240406	0.00220351	0.000835815
cg03389926	chr2	42651266	OpenSea			4	0.00451991	0.00113915	7.25408e-05	0.00451991	0.00113915	7.25408e-05	0	0	0.566542	0.904047	0.00317729	0.00306382	0.00593095	0.00218041	0.00385903	0.00314526	0.00439973	0.00150121
cg13009927	chr2	242254519	Island	SEPT2;SEPT2;HDLBP;SEPT2;SEPT2	TSS1500;TSS1500;5'UTR;TSS1500;TSS1500	4	-0.00283929	0.000715877	7.30358e-05	-0.00283929	0.000715877	7.30358e-05	0	0	1.25044	0.740934	-0.00116485	0.00177077	-0.00347008	0.00105141	-0.00223504	0.00208826	-0.00288098	0.00117094
cg26785702	chr11	118846877	S_Shelf	FOXR1	Body	4	0.00422825	0.00106685	7.39157e-05	0.00422825	0.00106685	7.39157e-05	0	0	1.69951	0.637042	0.0081672	0.00322575	0.00456868	0.00193385	0.00315797	0.00324437	0.00358109	0.00138481
cg26312951	chr21	42797847	N_Shore	MX1;MX1	TSS200;5'UTR	4	0.00817042	0.00202361	5.40114e-05	0.00816339	0.00206207	7.53167e-05	0.00063902	0	2.91394	0.405085	0.00616065	0.0056451	0.00353354	0.00420407	0.0158006	0.0054443	0.00898426	0.00256924
cg26107597	chr14	31343283	N_Shore	COCH;COCH	TSS1500;TSS1500	4	0.00608602	0.00153784	7.57328e-05	0.00608602	0.00153784	7.57328e-05	0	0	2.74375	0.432844	0.00448766	0.00484252	0.00799093	0.00301562	-0.000594091	0.00400426	0.00705002	0.00196588
cg03513388	chr1	17599362	OpenSea	PADI3	Body	4	0.00379991	0.000960457	7.61029e-05	0.00379991	0.000960457	7.61029e-05	0	0	0.515872	0.915391	0.0046118	0.00329083	0.00357746	0.00190184	0.00577967	0.00289746	0.00356754	0.0011778
cg26207201	chr10	104629179	Island	AS3MT	TSS200	4	0.000724258	0.000183185	7.69505e-05	0.000724258	0.000183185	7.69505e-05	0	0	2.05946	0.560159	0.00305691	0.00196165	0.000235058	0.00137923	0.00221021	0.00170643	0.000708213	0.000177836
cg01963224	chr14	71791671	S_Shelf			4	-0.00343853	0.000870114	7.75592e-05	-0.00343853	0.000870114	7.75592e-05	0	0	0.53556	0.911012	-0.00280264	0.00249703	-0.00405282	0.00128783	-0.00394211	0.00233837	-0.0027037	0.00136757
cg16744911	chr10	102108974	S_Shore	SCD	Body	4	-0.00431189	0.00100724	1.86146e-05	-0.00441642	0.0011177	7.77182e-05	0.000819413	0	2.06019	0.560008	-0.005454	0.00274955	-0.00624	0.00185559	-0.00454361	0.002972	-0.00294148	0.00133127
cg07379893	chr1	159902859	S_Shelf	IGSF9;IGSF9	Body;Body	4	0.00315625	0.000800018	7.9723e-05	0.00315625	0.000800018	7.9723e-05	0	0.0729093	3.23593	0.35666	0.00612856	0.002375	0.00117174	0.00150132	0.00407282	0.00245934	0.00344059	0.00102301
cg09497409	chr19	8275083	S_Shore	LASS4	5'UTR	4	-0.0150914	0.00382548	7.98106e-05	-0.0150914	0.00382548	7.98106e-05	0	0	0.0736989	0.994795	-0.0159522	0.00717116	-0.0145486	0.00624777	-0.0174442	0.01047	-0.0136807	0.00669526
cg25526061	chr10	135088451	N_Shore	ADAM8;ADAM8;ADAM8	Body;Body;Body	4	-0.00183383	0.000465089	8.04804e-05	-0.00183383	0.000465089	8.04804e-05	0	0	0.230496	0.972522	-0.00205016	0.00125173	-0.00212635	0.000880523	-0.00160869	0.0014905	-0.00164442	0.00060086
cg11405655	chr1	999599	N_Shore			4	-0.00485554	0.00123264	8.17757e-05	-0.00485554	0.00123264	8.17757e-05	0	0	1.7813	0.619012	-0.0070065	0.00308649	-0.00669217	0.00230799	-0.00289871	0.0044526	-0.00351409	0.00160565
cg26581200	chr22	30637461	N_Shelf	LIF	3'UTR	4	0.00348776	0.000885705	8.22187e-05	0.00348776	0.000885705	8.22187e-05	0	0	2.00512	0.571344	0.00232878	0.00311163	0.00411258	0.00163264	0.00720053	0.0027609	0.00289945	0.00111034
cg24543759	chr5	134784137	OpenSea	C5orf20	TSS1500	4	0.00372439	0.000875073	2.08034e-05	0.0037607	0.000955126	8.23747e-05	0.000623564	0	2.29051	0.514341	0.00292695	0.00259974	0.0030865	0.00159715	0.00817843	0.00280422	0.00363776	0.00112696
cg26494044	chr10	129760954	OpenSea	PTPRE	5'UTR	4	0.00425213	0.00106299	6.33045e-05	0.0042616	0.00108257	8.26579e-05	0.000337943	0	2.30967	0.510671	0.00764079	0.00296162	0.00507594	0.00190216	0.000937528	0.00332307	0.00363943	0.00140654
cg25256099	chr17	79484960	N_Shore			4	-0.00720346	0.00183146	8.38276e-05	-0.00720346	0.00183146	8.38276e-05	0	0	1.17142	0.759866	-0.00807781	0.00487944	-0.00672414	0.0033921	-0.00215402	0.00474743	-0.00828135	0.00249321
cg05670193	chr19	45324246	OpenSea	BCAM	3'UTR	4	0.00339151	0.000863957	8.65314e-05	0.00339151	0.000863957	8.65314e-05	0	0	1.66951	0.643734	0.00575033	0.00239753	0.00293848	0.00158225	0.0055165	0.00282708	0.00287906	0.00112305
cg27548256	chr19	39217070	N_Shore	ACTN4	Body	4	-0.00379921	0.000968006	8.68086e-05	-0.00379921	0.000968006	8.68086e-05	0	0	2.45321	0.483807	-0.00222373	0.00257571	-0.00180627	0.0018215	-0.00645966	0.00287968	-0.00462167	0.00127205
cg10564356	chr4	132677681	N_Shore			2	0.00283428	0.000722459	8.74175e-05	0.00283428	0.000722459	8.74175e-05	0	0	0.0651362	0.798555	0.00265821	0.000954342			0.00301018	0.000926686
cg01439754	chr2	112293267	OpenSea			4	0.0046877	0.00119402	8.63775e-05	0.00468753	0.00119501	8.75976e-05	8.0799e-05	0	2.07872	0.55623	0.00744372	0.00281041	0.00388547	0.00221595	-0.000295156	0.00422711	0.00491964	0.00159478
cg18474885	chr21	46292084	N_Shore	PTTG1IP	Body	4	-0.0036778	0.000862044	1.98671e-05	-0.00361929	0.000922881	8.79162e-05	0.000591476	0.0380655	3.11872	0.373681	0.000330779	0.0023667	-0.00411506	0.00140073	-0.00353742	0.00214486	-0.00445771	0.00128422
cg14889079	chr19	54606153	Island	NDUFA3	TSS200	4	-0.00576534	0.00144376	6.51636e-05	-0.00575864	0.00146868	8.81983e-05	0.000460247	0	2.44216	0.485835	-0.00588974	0.00324397	-0.00802704	0.00268408	0.00139377	0.00486433	-0.00540379	0.00197054
cg27541604	chr1	159046451	OpenSea	AIM2;AIM2	5'UTR;1stExon	4	0.00652888	0.00113306	8.30506e-09	0.00678189	0.00172972	8.82564e-05	0.00232383	0.419842	5.171	0.159695	0.0124988	0.00292324	0.00626806	0.00210853	0.00197307	0.00382461	0.00580137	0.00148074
cg00987918	chr6	30115829	OpenSea	TRIM40	3'UTR	4	0.00409577	0.00101863	5.79868e-05	0.00413471	0.00105518	8.91077e-05	0.00047681	0.0474794	3.14954	0.369139	0.00509364	0.00299003	0.0032245	0.00171496	0.00877855	0.00264538	0.00337227	0.0014344
cg10210094	chr1	201374614	OpenSea	TNNI1	3'UTR	4	0.00336909	0.000859853	8.92066e-05	0.00336909	0.000859853	8.92066e-05	0	0	0.74205	0.863272	0.00305949	0.00237764	0.00444314	0.00160716	0.00163173	0.00257293	0.00327238	0.00112237
cg17133487	chr12	27954854	OpenSea	KLHDC5	3'UTR	4	-0.00303957	0.000775868	8.94201e-05	-0.00303957	0.000775868	8.94201e-05	0	0	1.16167	0.762212	-0.00293071	0.00212692	-0.00475801	0.00176501	-0.00332001	0.002626	-0.0025063	0.000928913
cg25414605	chr11	67182672	N_Shore	ATPGD1;ATPGD1	TSS1500;TSS1500	4	-0.00465759	0.00112755	3.61633e-05	-0.00476173	0.00121688	9.11354e-05	0.000815801	0.0740062	3.23976	0.356115	-0.00670826	0.0028577	-0.00416587	0.00177954	-0.00982634	0.00323166	-0.00302958	0.00170111
cg09267787	chr6	11200441	OpenSea	NEDD9;NEDD9	Body;Body	4	-0.00115461	0.00029508	9.12131e-05	-0.00115461	0.00029508	9.12131e-05	0	0	0.887878	0.828352	-0.00096939	0.00204457	-0.00159772	0.00186051	-0.00371641	0.00248885	-0.00110308	0.000289444
cg20554353	chr7	72839549	S_Shore			4	0.00333267	0.000848318	8.54551e-05	0.00333494	0.000852338	9.12737e-05	0.000136828	0	2.17668	0.536556	0.00678645	0.00267469	0.00376519	0.0014568	0.00160898	0.00239798	0.00284816	0.00114049
cg11105980	chr13	37393381	Island	RFXAP;RFXAP	5'UTR;1stExon	4	-0.00272186	0.00069566	9.12963e-05	-0.00272186	0.00069566	9.12963e-05	0	0	1.00246	0.800657	-0.00172486	0.00153039	-0.00214024	0.00126859	-0.00362316	0.00199521	-0.00324414	0.000995669
cg11263997	chr11	70257280	Island	CTTN;CTTN	Body;Body	3	0.00230741	0.000589793	9.14473e-05	0.00230741	0.000589793	9.14473e-05	0	0	0.689706	0.708324	0.00292453	0.00134563			0.000441675	0.00229108	0.0023215	0.000640561
cg06168050	chr17	30677336	Island	ZNF207;ZNF207;ZNF207	1stExon;1stExon;1stExon	4	-0.00208433	0.000524264	7.01661e-05	-0.0020922	0.000534975	9.19806e-05	0.00018394	0	2.654	0.448101	-0.00390987	0.00167	-0.00112592	0.000792725	-0.00260444	0.00136561	-0.00241615	0.000791316
cg13734401	chr9	138881660	N_Shore			4	-0.00872498	0.00223655	9.57612e-05	-0.00872498	0.00223655	9.57612e-05	0	0	0.824926	0.843496	-0.011818	0.00601108	-0.00979725	0.00437959	-0.0119267	0.00646181	-0.0068206	0.00289355
cg11145461	chr1	201475451	N_Shore	CSRP1;CSRP1	5'UTR;5'UTR	4	-0.00399236	0.00102392	9.6553e-05	-0.00399236	0.00102392	9.6553e-05	0	0	1.47487	0.688082	0.000633091	0.00392588	-0.00510348	0.00295891	-0.00351045	0.00370971	-0.00418663	0.00111387
cg05703659	chr7	158494734	N_Shelf	NCAPG2	5'UTR	4	0.00383524	0.000932822	3.93198e-05	0.00387029	0.000992627	9.65758e-05	0.000515579	0.133704	3.46302	0.32559	0.00584608	0.00271829	0.00173298	0.00200011	0.00865731	0.00314834	0.00368353	0.0011242
cg15965675	chr14	19594171	OpenSea			2	-0.00528769	0.00135655	9.70323e-05	-0.00528769	0.00135655	9.70323e-05	0	0	3.21802e-05	0.995474	-0.00528241	0.00156188			-0.00533892	0.0021527
cg14438812	chr10	574670	N_Shore	DIP2C	Body	4	0.00430208	0.00110414	9.76648e-05	0.00430208	0.00110414	9.76648e-05	0	0	1.98133	0.576292	0.00600669	0.00339651	0.00671934	0.00236382	0.00125153	0.00316888	0.00380814	0.00134792
cg05519431	chr4	87515674	Island	PTPN13;PTPN13;PTPN13;PTPN13;PTPN13;PTPN13;PTPN13;PTPN13	5'UTR;5'UTR;1stExon;5'UTR;1stExon;5'UTR;1stExon;1stExon	4	0.000849292	0.000218003	9.78845e-05	0.000849292	0.000218003	9.78845e-05	0	0	0.868533	0.833014	-0.000386006	0.00175972	2.21381e-05	0.00139426	0.00131295	0.00196919	0.000892751	0.000213048
cg20434926	chr19	46181274	Island	GIPR	Body	4	0.00367511	0.000943788	9.86046e-05	0.00367511	0.000943788	9.86046e-05	0	0	0.872308	0.832105	0.00197348	0.00294715	0.00295171	0.00195469	0.00242482	0.00305352	0.00439367	0.00114315
cg04202511	chr16	68117991	N_Shore	NFATC3;NFATC3;NFATC3;NFATC3	TSS1500;TSS1500;TSS1500;TSS1500	3	0.00851845	0.00216339	8.23203e-05	0.00850638	0.00218463	9.87115e-05	0.000504617	0	1.98847	0.370007	0.00333574	0.00409972	0.0107097	0.00298285	0.00961045	0.00367734
cg23996071	chr1	60280809	Island	HOOK1	1stExon	4	0.00358156	0.000920556	9.99783e-05	0.00358156	0.000920556	9.99783e-05	0	0	2.07496	0.556995	0.00273394	0.00253988	0.00438369	0.00159842	0.00697961	0.00268494	0.0027353	0.00125699
cg05724871	chr18	6414446	Island	L3MBTL4	5'UTR	3	0.00580952	0.00149424	0.000101103	0.00580952	0.00149424	0.000101103	0	0	0.576168	0.749699	0.00532864	0.00272611	0.00687149	0.00198083	0.00394269	0.00286961
cg13929323	chr9	114364066	S_Shelf			4	0.00891451	0.0018206	9.75691e-07	0.0102766	0.00264621	0.00010296	0.00303844	0.305949	4.32245	0.228685	0.00954575	0.00542338	0.0153249	0.00443381	0.0177354	0.00661827	0.00675297	0.00209888
cg13372635	chr1	182557217	OpenSea	RNASEL	TSS1500	2	-0.00778829	0.00200559	0.00010305	-0.00778829	0.00200559	0.00010305	0	0	0.0780473	0.779961	-0.00828437	0.0025591			-0.00720521	0.00268005
cg03345668	chr1	47081524	N_Shore	MOBKL2C;MOBKL2C	TSS1500;5'UTR	4	-0.00526873	0.0013573	0.000103693	-0.00526873	0.0013573	0.000103693	0	0	1.48679	0.685323	-0.00375646	0.00396664	-0.00735288	0.00251317	-0.00786566	0.00406045	-0.0040302	0.00175931
cg21556967	chr4	156132665	S_Shelf	NPY2R	5'UTR	3	0.00413982	0.00106715	0.000104744	0.00413982	0.00106715	0.000104744	0	0	1.09873	0.577316	0.00180017	0.00236911			0.00482044	0.00235408	0.00468547	0.00126022
cg01669161	chr7	1632265	OpenSea			4	-0.00711962	0.00183603	0.000105436	-0.00711962	0.00183603	0.000105436	0	0	0.960753	0.810747	-0.00339459	0.00430731	-0.0086563	0.00290992	-0.00721688	0.00394079	-0.00707642	0.00317438
cg16737991	chr19	55876060	S_Shelf	IL11;FAM71E2	3'UTR;TSS1500	4	-0.00139889	0.000360775	0.000105558	-0.00139889	0.000360775	0.000105558	0	0	0.463466	0.926841	-0.00180385	0.00222265	-0.00232437	0.00192285	-0.000191866	0.00249983	-0.0013596	0.000357566
cg11571588	chr1	11114821	OpenSea	SRM	3'UTR	4	-0.00153293	0.000395376	0.000105695	-0.00153293	0.000395376	0.000105695	0	0	1.10825	0.775082	0.000364803	0.00213599	-0.00105764	0.00135544	-0.00280179	0.00210639	-0.00158135	0.000405999
cg26130023	chr18	45453609	N_Shelf	SMAD2;SMAD2;SMAD2	5'UTR;5'UTR;5'UTR	4	-0.00108501	0.000279961	0.000106376	-0.00108501	0.000279961	0.000106376	0	0	1.70297	0.636274	0.00142658	0.00212388	-0.00105685	0.00171653	0.000568104	0.00243008	-0.00113171	0.000274258
