# Supplementary material for: Sex effects on DNA methylation affect discovery in epigenome-wide association study of schizophrenia
Source: Research Square preprint supplement (doi:10.21203/rs.3.rs-3427549/v1), 2023-10-19
Supplement: Supplementary file 4 [file af806854fba732253e40c773.xlsx]

## Sheet: Index
Supplementary tables S5-S9 showing the cis-methylation quantitative trait loci (cis-meQTL) in blood at different life course stages of humans for CpGs associated with schizophrenia
Table S5: cis-meQTL in pregnancy of CpGs associated with schizophrenia
Table S6: cis-meQTL at birth of CpGs associated with schizophrenia
Table S7: cis-meQTL in childhood of CpGs associated with schizophrenia
Table S8: cis-meQTL in adolescence of CpGs associated with schizophrenia
Table S9: cis-meQTL in middle age of CpGs associated with schizophrenia

## Sheet: Table S5
SNP	SNP Chromosome	SNP Position	A1	A2	MAF	CpG	CpG Chromosome	CpG Position	Beta	t-statistic	Effect Size	P-value
rs77108242	1	158961076	T	G	0.019	cg27541604	1	159046451	-0.64684	-5.4365	0	7.32e-08
rs141760321	1	158997894	D	R	0.181	cg27541604	1	159046451	-0.26146	-5.98775	0.02038	3.28e-09
rs7535630	1	158995565	G	A	0.161	cg27541604	1	159046451	-0.27181	-5.98768	0.02408	3.28e-09
rs78756391	1	159060449	C	T	0.05	cg27541604	1	159046451	-0.7069	-9.65442	0	6.97e-21
rs12061401	1	158996619	T	C	0.136	cg27541604	1	159046451	-0.31791	-6.6024	0.02383	7.58e-11
rs7545770	1	158995562	A	G	0.16	cg27541604	1	159046451	-0.27072	-5.95673	0.02396	3.93e-09
rs7538035	1	158995583	C	T	0.16	cg27541604	1	159046451	-0.27072	-5.95673	0.02396	3.93e-09
rs73021847	1	158980874	C	T	0.034	cg27541604	1	159046451	-0.52463	-5.85153	0.00083	7.23e-09
rs1101995	1	158997479	A	G	0.173	cg27541604	1	159046451	-0.26698	-6.0669	0.02057	2.05e-09
rs55853408	1	158996348	G	C	0.158	cg27541604	1	159046451	-0.27027	-5.93488	0.02383	4.46e-09
rs2814764	1	159064568	A	T	0.112	cg27541604	1	159046451	-0.33644	-6.54415	0.03566	1.1e-10
rs855871	1	159044651	G	A	0.11	cg27541604	1	159046451	-0.3365	-6.52023	0.03566	1.28e-10
rs3768523	1	159003998	C	G	0.12	cg27541604	1	159046451	-0.3574	-7.0942	0.03104	2.98e-12
rs57678093	1	159069645	D	R	0.111	cg27541604	1	159046451	-0.3356	-6.51433	0.03533	1.33e-10
rs2518562	1	159055656	C	T	0.101	cg27541604	1	159046451	-0.35765	-6.70684	0.03089	3.88e-11
rs2814760	1	159070984	C	T	0.111	cg27541604	1	159046451	-0.3356	-6.51433	0.03533	1.33e-10
rs2814759	1	159070991	G	A	0.111	cg27541604	1	159046451	-0.3356	-6.51433	0.03533	1.33e-10
rs2814757	1	159072524	C	T	0.111	cg27541604	1	159046451	-0.3356	-6.51433	0.03533	1.33e-10
rs56248786	1	158994094	A	G	0.173	cg27541604	1	159046451	-0.26698	-6.0669	0.02057	2.05e-09
rs12061402	1	158996620	G	C	0.146	cg27541604	1	159046451	-0.30371	-6.49939	0.02396	1.46e-10
rs2793844	1	159016967	A	G	0.123	cg27541604	1	159046451	-0.34426	-6.88813	0.03111	1.18e-11
rs1101996	1	158998026	A	C	0.173	cg27541604	1	159046451	-0.26698	-6.0669	0.02057	2.05e-09
rs1101998	1	158999284	C	T	0.173	cg27541604	1	159046451	-0.26698	-6.0669	0.02057	2.05e-09
rs2852723	1	159073725	G	A	0.111	cg27541604	1	159046451	-0.33115	-6.42332	0.03533	2.35e-10
rs78916278	1	159044225	G	C	0.049	cg27541604	1	159046451	-0.7069	-9.65442	0	6.97e-21
rs9970350	1	159074755	T	C	0.031	cg27541604	1	159046451	-0.68256	-7.3684	0	4.5e-13
rs2518563	1	159059969	C	T	0.193	cg27541604	1	159046451	-0.24544	-5.80853	0.02865	9.25e-09
rs2518564	1	159062436	G	A	0.193	cg27541604	1	159046451	-0.24544	-5.80853	0.02865	9.25e-09
rs1894043	1	159069211	T	C	0.193	cg27541604	1	159046451	-0.24544	-5.80853	0.02865	9.25e-09
rs75491800	1	159045169	G	A	0.048	cg27541604	1	159046451	-0.7009	-9.50149	0	2.61e-20
rs1772405	1	159010001	G	A	0.167	cg27541604	1	159046451	-0.27218	-6.11949	0.02864	1.5e-09
rs12093523	1	158998120	C	G	0.162	cg27541604	1	159046451	-0.27667	-6.11146	0.02408	1.57e-09
rs2570916	1	159012646	C	T	0.17	cg27541604	1	159046451	-0.27848	-6.29454	0.02877	5.2e-10
rs12122315	1	159022557	A	G	0.162	cg27541604	1	159046451	-0.28131	-6.2852	0.02877	5.51e-10
rs855865	1	159028378	C	T	0.162	cg27541604	1	159046451	-0.28131	-6.2852	0.02877	5.51e-10
rs856052	1	159001424	T	G	0.162	cg27541604	1	159046451	-0.2735	-6.10186	0.02889	1.67e-09
rs1935067	1	159050103	A	G	0.051	cg27541604	1	159046451	-0.71969	-9.97649	0	4.09e-22
rs855866	1	159052720	A	G	0.181	cg27541604	1	159046451	-0.26888	-6.2309	0.0296	7.67e-10
rs11403286	1	158981901	I	R	0.036	cg27541604	1	159046451	-0.54223	-6.21774	0.0009	8.31e-10
rs141520572	1	158997233	D	R	0.173	cg27541604	1	159046451	-0.26588	-6.03597	0.02057	2.47e-09
rs856055	1	159001593	C	T	0.162	cg27541604	1	159046451	-0.2735	-6.10186	0.02889	1.67e-09
rs76808161	1	159065430	G	T	0.049	cg27541604	1	159046451	-0.7009	-9.50149	0	2.61e-20
rs34643387	1	158999954	D	R	0.163	cg27541604	1	159046451	-0.27633	-6.14177	0.02769	1.31e-09
rs1057028	1	159002389	T	A	0.162	cg27541604	1	159046451	-0.2735	-6.10186	0.02889	1.67e-09
rs2518565	1	159070113	A	G	0.111	cg27541604	1	159046451	-0.3356	-6.51433	0.03533	1.33e-10
rs12098223	1	159011694	A	G	0.12	cg27541604	1	159046451	-0.35751	-7.10894	0.03108	2.69e-12
rs3768513	1	159012217	A	T	0.12	cg27541604	1	159046451	-0.35751	-7.10894	0.03108	2.69e-12
rs2814771	1	159012238	T	C	0.12	cg27541604	1	159046451	-0.35751	-7.10894	0.03108	2.69e-12
rs2518555	1	159012535	A	G	0.12	cg27541604	1	159046451	-0.35751	-7.10894	0.03108	2.69e-12
rs2814770	1	159012772	T	C	0.12	cg27541604	1	159046451	-0.35751	-7.10894	0.03108	2.69e-12
rs2236584	1	159014645	G	A	0.12	cg27541604	1	159046451	-0.35751	-7.10894	0.03108	2.69e-12
rs11265134	1	159014718	G	A	0.12	cg27541604	1	159046451	-0.35751	-7.10894	0.03108	2.69e-12
rs6940	1	159024668	T	A	0.12	cg27541604	1	159046451	-0.35751	-7.10894	0.03108	2.69e-12
rs74359395	1	159027003	G	A	0.12	cg27541604	1	159046451	-0.35751	-7.10894	0.03108	2.69e-12
rs2793845	1	159032255	G	T	0.12	cg27541604	1	159046451	-0.35751	-7.10894	0.03108	2.69e-12
rs2078723	1	159072081	C	G	0.111	cg27541604	1	159046451	-0.3356	-6.51433	0.03533	1.33e-10
rs74122214	1	159001528	C	T	0.12	cg27541604	1	159046451	-0.3574	-7.0942	0.03104	2.98e-12
rs3768519	1	159005224	G	C	0.12	cg27541604	1	159046451	-0.3574	-7.0942	0.03104	2.98e-12
rs74122232	1	159006423	A	G	0.12	cg27541604	1	159046451	-0.3574	-7.0942	0.03104	2.98e-12
rs3754460	1	159006846	C	T	0.12	cg27541604	1	159046451	-0.3574	-7.0942	0.03104	2.98e-12
rs3768515	1	159010232	G	T	0.12	cg27541604	1	159046451	-0.3574	-7.0942	0.03104	2.98e-12
rs3768514	1	159010309	G	A	0.12	cg27541604	1	159046451	-0.3574	-7.0942	0.03104	2.98e-12
rs74122213	1	159001065	C	T	0.164	cg27541604	1	159046451	-0.28049	-6.35924	0.02707	3.49e-10
rs2852696	1	159015984	G	A	0.12	cg27541604	1	159046451	-0.35686	-7.08261	0.03111	3.22e-12
rs2840312	1	159000027	C	T	0.163	cg27541604	1	159046451	-0.27585	-6.16275	0.02864	1.16e-09
rs3018316	1	159017958	G	T	0.121	cg27541604	1	159046451	-0.35375	-7.05405	0.03108	3.91e-12
rs67843408	1	158995219	G	A	0.163	cg27541604	1	159046451	-0.27776	-6.14243	0.02423	1.31e-09
rs11265132	1	158995363	C	T	0.163	cg27541604	1	159046451	-0.27776	-6.14243	0.02423	1.31e-09
rs73021886	1	158995412	A	G	0.163	cg27541604	1	159046451	-0.27776	-6.14243	0.02423	1.31e-09
rs11265133	1	158995448	G	A	0.163	cg27541604	1	159046451	-0.27776	-6.14243	0.02423	1.31e-09
rs56374780	1	158996174	C	T	0.163	cg27541604	1	159046451	-0.27776	-6.14243	0.02423	1.31e-09
rs60958912	1	158996427	T	C	0.163	cg27541604	1	159046451	-0.27776	-6.14243	0.02423	1.31e-09
rs56235865	1	158996524	G	A	0.163	cg27541604	1	159046451	-0.27776	-6.14243	0.02423	1.31e-09
rs856054	1	159001521	C	T	0.179	cg27541604	1	159046451	-0.2595	-5.99094	0.02824	3.22e-09
rs3834102	1	159047008	D	R	0.05	cg27541604	1	159046451	-0.72325	-9.96942	0	4.36e-22
rs1417804	1	159003983	C	G	0.167	cg27541604	1	159046451	-0.27218	-6.11949	0.02864	1.5e-09
rs1614182	1	159004526	C	T	0.167	cg27541604	1	159046451	-0.27218	-6.11949	0.02864	1.5e-09
rs1633262	1	159004888	C	T	0.167	cg27541604	1	159046451	-0.27218	-6.11949	0.02864	1.5e-09
rs1772408	1	159005649	A	G	0.167	cg27541604	1	159046451	-0.27218	-6.11949	0.02864	1.5e-09
rs1633265	1	159005727	C	T	0.167	cg27541604	1	159046451	-0.27218	-6.11949	0.02864	1.5e-09
rs9970870	1	159074799	A	G	0.028	cg27541604	1	159046451	-0.68203	-6.79717	0	2.15e-11
rs1101991	1	158993268	G	A	0.162	cg27541604	1	159046451	-0.27667	-6.11146	0.02408	1.57e-09
rs12240111	1	158997730	A	G	0.162	cg27541604	1	159046451	-0.27667	-6.11146	0.02408	1.57e-09
rs12239136	1	158997848	T	C	0.162	cg27541604	1	159046451	-0.27667	-6.11146	0.02408	1.57e-09
rs12090965	1	158998221	A	T	0.162	cg27541604	1	159046451	-0.27667	-6.11146	0.02408	1.57e-09
rs12094545	1	158998251	A	G	0.162	cg27541604	1	159046451	-0.27667	-6.11146	0.02408	1.57e-09
rs12094692	1	158998539	A	G	0.162	cg27541604	1	159046451	-0.27667	-6.11146	0.02408	1.57e-09
rs12094741	1	158998665	A	G	0.162	cg27541604	1	159046451	-0.27667	-6.11146	0.02408	1.57e-09
rs12094786	1	158998713	A	G	0.162	cg27541604	1	159046451	-0.27667	-6.11146	0.02408	1.57e-09
rs2106094	1	158999066	T	C	0.162	cg27541604	1	159046451	-0.27667	-6.11146	0.02408	1.57e-09
rs2157694	1	158999249	A	G	0.162	cg27541604	1	159046451	-0.27667	-6.11146	0.02408	1.57e-09
rs12144575	1	158999390	A	G	0.162	cg27541604	1	159046451	-0.27667	-6.11146	0.02408	1.57e-09
rs4575082	1	158999628	A	G	0.162	cg27541604	1	159046451	-0.27667	-6.11146	0.02408	1.57e-09
rs4531291	1	158999693	A	T	0.162	cg27541604	1	159046451	-0.27667	-6.11146	0.02408	1.57e-09
rs67772786	1	158999802	G	A	0.162	cg27541604	1	159046451	-0.27667	-6.11146	0.02408	1.57e-09
rs66831955	1	158999811	C	A	0.162	cg27541604	1	159046451	-0.27667	-6.11146	0.02408	1.57e-09
rs76839161	1	159045424	C	A	0.05	cg27541604	1	159046451	-0.72325	-9.96942	0	4.36e-22
rs76430338	1	159045461	A	C	0.05	cg27541604	1	159046451	-0.72325	-9.96942	0	4.36e-22
rs41264457	1	159046378	G	C	0.05	cg27541604	1	159046451	-0.72325	-9.96942	0	4.36e-22
rs2298803	1	159046430	C	T	0.05	cg27541604	1	159046451	-0.72325	-9.96942	0	4.36e-22
rs16841642	1	159046798	T	G	0.05	cg27541604	1	159046451	-0.72325	-9.96942	0	4.36e-22
rs55786327	1	159049316	D	R	0.05	cg27541604	1	159046451	-0.72325	-9.96942	0	4.36e-22
rs55719948	1	159049468	T	G	0.05	cg27541604	1	159046451	-0.72325	-9.96942	0	4.36e-22
rs55791394	1	159050715	A	C	0.05	cg27541604	1	159046451	-0.72325	-9.96942	0	4.36e-22
rs80323972	1	159051001	T	A	0.05	cg27541604	1	159046451	-0.72325	-9.96942	0	4.36e-22
rs76789206	1	159051082	T	G	0.05	cg27541604	1	159046451	-0.72325	-9.96942	0	4.36e-22
rs79288222	1	159054382	A	G	0.05	cg27541604	1	159046451	-0.72325	-9.96942	0	4.36e-22
rs856051	1	159001292	T	C	0.162	cg27541604	1	159046451	-0.2735	-6.10186	0.02889	1.67e-09
rs856053	1	159001504	G	A	0.162	cg27541604	1	159046451	-0.2735	-6.10186	0.02889	1.67e-09
rs856056	1	159001709	A	T	0.162	cg27541604	1	159046451	-0.2735	-6.10186	0.02889	1.67e-09
rs856057	1	159001735	A	T	0.162	cg27541604	1	159046451	-0.2735	-6.10186	0.02889	1.67e-09
rs856058	1	159002155	T	A	0.162	cg27541604	1	159046451	-0.2735	-6.10186	0.02889	1.67e-09
rs861318	1	159002222	A	G	0.162	cg27541604	1	159046451	-0.2735	-6.10186	0.02889	1.67e-09
rs2518553	1	159002301	T	C	0.162	cg27541604	1	159046451	-0.2735	-6.10186	0.02889	1.67e-09
rs1057027	1	159002377	C	A	0.162	cg27541604	1	159046451	-0.2735	-6.10186	0.02889	1.67e-09
rs1633256	1	159002557	A	G	0.162	cg27541604	1	159046451	-0.2735	-6.10186	0.02889	1.67e-09
rs200604720	1	159002576	D	R	0.162	cg27541604	1	159046451	-0.2735	-6.10186	0.02889	1.67e-09
rs1772415	1	159002778	A	G	0.162	cg27541604	1	159046451	-0.2735	-6.10186	0.02889	1.67e-09
rs7532207	1	159024424	T	A	0.12	cg27541604	1	159046451	-0.35751	-7.10894	0.03108	2.69e-12
rs143891965	1	159043614	A	C	0.049	cg27541604	1	159046451	-0.71748	-9.81695	0	1.68e-21
rs1772414	1	159002907	G	A	0.161	cg27541604	1	159046451	-0.27267	-6.0713	0.02865	2e-09
rs201604504	1	159045193	I	R	0.05	cg27541604	1	159046451	-0.71634	-9.92411	0	6.52e-22
rs2106095	1	159000259	A	T	0.162	cg27541604	1	159046451	-0.27731	-6.19122	0.02865	9.75e-10
rs7540687	1	158996015	G	T	0.173	cg27541604	1	159046451	-0.26698	-6.0669	0.02057	2.05e-09
rs56348543	1	158996579	G	A	0.173	cg27541604	1	159046451	-0.26698	-6.0669	0.02057	2.05e-09
rs12087333	1	158996771	G	A	0.173	cg27541604	1	159046451	-0.26698	-6.0669	0.02057	2.05e-09
rs1101993	1	158996895	G	A	0.173	cg27541604	1	159046451	-0.26698	-6.0669	0.02057	2.05e-09
rs1101994	1	158996926	T	C	0.173	cg27541604	1	159046451	-0.26698	-6.0669	0.02057	2.05e-09
rs12120311	1	158997304	G	C	0.173	cg27541604	1	159046451	-0.26698	-6.0669	0.02057	2.05e-09
rs149917423	1	159015766	D	R	0.123	cg27541604	1	159046451	-0.34426	-6.88813	0.03111	1.18e-11
rs2852695	1	159015933	G	A	0.123	cg27541604	1	159046451	-0.34426	-6.88813	0.03111	1.18e-11
rs146423674	1	159018942	G	A	0.123	cg27541604	1	159046451	-0.34426	-6.88813	0.03111	1.18e-11
rs1101997	1	158998254	C	A	0.183	cg27541604	1	159046451	-0.2548	-5.90076	0.02057	5.44e-09
rs3737522	1	159021445	G	A	0.12	cg27541604	1	159046451	-0.35751	-7.10894	0.03108	2.69e-12
rs1616024	1	159004298	C	T	0.126	cg27541604	1	159046451	-0.34119	-6.86842	0.03099	1.35e-11
rs1772407	1	159005924	G	A	0.126	cg27541604	1	159046451	-0.34119	-6.86842	0.03099	1.35e-11
rs1633266	1	159005977	C	T	0.126	cg27541604	1	159046451	-0.34119	-6.86842	0.03099	1.35e-11
rs1633267	1	159010220	T	G	0.126	cg27541604	1	159046451	-0.34119	-6.86842	0.03099	1.35e-11
rs2157695	1	158999996	T	C	0.163	cg27541604	1	159046451	-0.27585	-6.16275	0.02864	1.16e-09
rs7525853	1	158992396	G	A	0.173	cg27541604	1	159046451	-0.26588	-6.03597	0.02057	2.47e-09
rs12139793	1	158997290	C	T	0.173	cg27541604	1	159046451	-0.26588	-6.03597	0.02057	2.47e-09
rs74555135	1	159043352	A	G	0.048	cg27541604	1	159046451	-0.7009	-9.50149	0	2.61e-20
rs80033126	1	159052413	G	A	0.049	cg27541604	1	159046451	-0.7009	-9.50149	0	2.61e-20
rs75657667	1	159056271	C	T	0.049	cg27541604	1	159046451	-0.7009	-9.50149	0	2.61e-20
rs76457189	1	159061359	G	A	0.049	cg27541604	1	159046451	-0.7009	-9.50149	0	2.61e-20
rs76576833	1	159062973	T	C	0.049	cg27541604	1	159046451	-0.7009	-9.50149	0	2.61e-20
rs79129191	1	159064652	C	T	0.049	cg27541604	1	159046451	-0.7009	-9.50149	0	2.61e-20
rs16841682	1	159064818	C	A	0.049	cg27541604	1	159046451	-0.7009	-9.50149	0	2.61e-20
rs76706394	1	159068032	T	C	0.049	cg27541604	1	159046451	-0.7009	-9.50149	0	2.61e-20
rs112232953	1	159068261	I	R	0.049	cg27541604	1	159046451	-0.7009	-9.50149	0	2.61e-20
rs12124059	1	159026639	C	T	0.161	cg27541604	1	159046451	-0.2769	-6.17599	0.02865	1.07e-09
rs855867	1	159052847	G	A	0.112	cg27541604	1	159046451	-0.34543	-6.77616	0.03057	2.47e-11
rs12059564	1	159000779	T	C	0.14	cg27541604	1	159046451	-0.31817	-6.76855	0.02833	2.6e-11
rs77197757	1	159039841	C	T	0.049	cg27541604	1	159046451	-0.68434	-9.31056	0	1.33e-19
rs2852699	1	159018359	G	C	0.134	cg27541604	1	159046451	-0.32914	-6.75549	0.03108	2.83e-11
rs190334093	7	127932498	A	G	0.063	cg24107852	7	127960508	0.50554	5.74024	0.01957	1.36e-08
rs183625663	7	127932431	A	G	0.064	cg24107852	7	127960508	0.5022	5.72356	0.01955	1.5e-08
rs55913412	7	127966509	C	T	0.078	cg24107852	7	127960508	0.52312	6.52056	0.01743	1.27e-10
rs55667068	7	127980173	G	T	0.078	cg24107852	7	127960508	0.52312	6.52056	0.01743	1.27e-10
rs142106450	7	127944234	I	R	0.08	cg24107852	7	127960508	0.52298	6.55939	0.01743	9.97e-11
rs6467170	7	127945168	C	T	0.08	cg24107852	7	127960508	0.52298	6.55939	0.01743	9.97e-11
rs6952533	7	127946072	G	A	0.08	cg24107852	7	127960508	0.52298	6.55939	0.01743	9.97e-11
rs7804796	7	127953243	C	T	0.08	cg24107852	7	127960508	0.52298	6.55939	0.01743	9.97e-11
rs17151996	7	127954710	G	A	0.08	cg24107852	7	127960508	0.52298	6.55939	0.01743	9.97e-11
rs6467174	7	127969867	G	A	0.08	cg24107852	7	127960508	0.52298	6.55939	0.01743	9.97e-11
rs17151983	7	127946108	T	C	0.078	cg24107852	7	127960508	0.52312	6.52056	0.01743	1.27e-10
rs73230631	7	127947299	A	G	0.078	cg24107852	7	127960508	0.52312	6.52056	0.01743	1.27e-10
rs73721355	7	127948025	T	C	0.078	cg24107852	7	127960508	0.52312	6.52056	0.01743	1.27e-10
rs73230633	7	127948472	A	T	0.078	cg24107852	7	127960508	0.52312	6.52056	0.01743	1.27e-10
rs17151987	7	127950414	C	T	0.078	cg24107852	7	127960508	0.52312	6.52056	0.01743	1.27e-10
rs6980001	7	127951366	A	C	0.078	cg24107852	7	127960508	0.52312	6.52056	0.01743	1.27e-10
rs6980301	7	127951413	A	G	0.078	cg24107852	7	127960508	0.52312	6.52056	0.01743	1.27e-10
rs73230642	7	127956294	A	T	0.078	cg24107852	7	127960508	0.52312	6.52056	0.01743	1.27e-10
rs17152000	7	127956424	G	A	0.078	cg24107852	7	127960508	0.52312	6.52056	0.01743	1.27e-10
rs17152002	7	127959221	A	G	0.078	cg24107852	7	127960508	0.52312	6.52056	0.01743	1.27e-10
rs77083233	7	127961878	G	A	0.078	cg24107852	7	127960508	0.52312	6.52056	0.01743	1.27e-10
rs111807968	7	127964994	T	C	0.078	cg24107852	7	127960508	0.52312	6.52056	0.01743	1.27e-10
rs111641601	7	127969260	A	C	0.078	cg24107852	7	127960508	0.52312	6.52056	0.01743	1.27e-10
rs113962289	7	127969331	C	T	0.078	cg24107852	7	127960508	0.52312	6.52056	0.01743	1.27e-10
rs73230656	7	127973759	T	C	0.078	cg24107852	7	127960508	0.52312	6.52056	0.01743	1.27e-10
rs5887369	7	127977545	D	R	0.078	cg24107852	7	127960508	0.52312	6.52056	0.01743	1.27e-10
rs41281731	7	127978445	T	C	0.078	cg24107852	7	127960508	0.52312	6.52056	0.01743	1.27e-10
rs73228315	7	127940263	T	C	0.076	cg24107852	7	127960508	0.52561	6.49114	0.01743	1.53e-10
rs73230657	7	127974336	T	C	0.08	cg24107852	7	127960508	0.51421	6.46315	0.01741	1.83e-10
rs7800186	7	127975289	A	T	0.08	cg24107852	7	127960508	0.51421	6.46315	0.01741	1.83e-10
rs73230632	7	127947917	T	G	0.078	cg24107852	7	127960508	0.51933	6.45048	0.01741	1.98e-10
rs41281728	7	127953113	A	G	0.078	cg24107852	7	127960508	0.51933	6.45048	0.01741	1.98e-10
rs73230649	7	127961534	C	A	0.078	cg24107852	7	127960508	0.51933	6.45048	0.01741	1.98e-10
rs73230652	7	127963553	A	G	0.078	cg24107852	7	127960508	0.51933	6.45048	0.01741	1.98e-10
rs73230654	7	127969455	A	T	0.078	cg24107852	7	127960508	0.51933	6.45048	0.01741	1.98e-10
rs56007906	7	127979915	G	A	0.078	cg24107852	7	127960508	0.51933	6.45048	0.01741	1.98e-10
rs143065437	7	127917256	A	G	0.077	cg24107852	7	127960508	0.51323	6.37058	0.01741	3.26e-10
rs73226694	7	127918050	A	G	0.077	cg24107852	7	127960508	0.51323	6.37058	0.01741	3.26e-10
rs73226697	7	127922834	G	A	0.077	cg24107852	7	127960508	0.51323	6.37058	0.01741	3.26e-10
rs73226699	7	127923751	A	G	0.077	cg24107852	7	127960508	0.51323	6.37058	0.01741	3.26e-10
rs112432905	7	127931583	A	G	0.077	cg24107852	7	127960508	0.51323	6.37058	0.01741	3.26e-10
rs111571358	7	127910634	T	C	0.078	cg24107852	7	127960508	0.50824	6.32523	0.01739	4.31e-10
rs140579308	7	127931540	C	G	0.077	cg24107852	7	127960508	0.51323	6.37058	0.01741	3.26e-10
rs73721362	7	127974832	A	G	0.076	cg24107852	7	127960508	0.48595	5.95819	0.01739	3.9e-09
rs723627	7	127967998	A	G	0.078	cg24107852	7	127960508	0.52312	6.52056	0.01743	1.27e-10
rs113048914	7	127931416	A	G	0.077	cg24107852	7	127960508	0.51323	6.37058	0.01741	3.26e-10
rs73230659	7	127974845	A	G	0.075	cg24107852	7	127960508	0.4819	5.887	0.01738	5.89e-09
rs79439739	7	127911806	A	G	0.079	cg24107852	7	127960508	0.50628	6.31927	0.01739	4.47e-10
rs11069	7	127944314	G	C	0.08	cg24107852	7	127960508	0.52298	6.55939	0.01743	9.97e-11
rs2402890	7	127977352	C	T	0.078	cg24107852	7	127960508	0.52312	6.52056	0.01743	1.27e-10
rs142141865	7	127941481	D	R	0.077	cg24107852	7	127960508	0.5308	6.57989	0.01743	8.75e-11
rs6994692	8	142239377	A	C	0.095	cg26547058	8	142243143	-0.44926	-6.5049	0.04156	1.41e-10
rs11782278	8	142240768	T	C	0.094	cg26547058	8	142243143	-0.44994	-6.48377	0.04156	1.61e-10
rs12680657	8	142242904	T	C	0.095	cg26547058	8	142243143	-0.44821	-6.47325	0.0416	1.72e-10
rs11782904	8	142246550	T	C	0.095	cg26547058	8	142243143	-0.44821	-6.47325	0.0416	1.72e-10
rs75130436	8	142243110	C	G	0.095	cg26547058	8	142243143	-0.45019	-6.51915	0.04156	1.29e-10
rs7002356	8	142245999	A	G	0.096	cg26547058	8	142243143	-0.45019	-6.51915	0.04156	1.29e-10
rs11783506	8	142237178	C	T	0.089	cg26547058	8	142243143	-0.44606	-6.19185	0.02325	9.72e-10

## Sheet: Table S6
SNP	SNP Chromosome	SNP Position	A1	A2	MAF	CpG	CpG Chromosome	CpG Position	Beta	t-statistic	Effect Size	P-value
rs11764695	7	5493845	G	A	0.092	cg09022230	7	5457225	-0.406	-5.72166	0.05364	1.51e-08
rs6961091	7	5509239	A	G	0.147	cg09022230	7	5457225	-0.41798	-7.11903	0.05199	2.5e-12
rs11767141	7	5508673	A	G	0.148	cg09022230	7	5457225	-0.42927	-7.34088	0.05273	5.41e-13
rs7786990	7	5499748	G	T	0.19	cg09022230	7	5457225	-0.40697	-7.79614	0.05274	2.08e-14
rs4236391	7	5486082	A	G	0.202	cg09022230	7	5457225	-0.29643	-5.40829	0.04977	8.5e-08
rs10951958	7	5537205	A	G	0.139	cg09022230	7	5457225	-0.34545	-5.68755	0.03357	1.83e-08
rs7789109	7	5537779	T	C	0.139	cg09022230	7	5457225	-0.34545	-5.68755	0.03357	1.83e-08
rs142757270	7	5538682	D	R	0.139	cg09022230	7	5457225	-0.34545	-5.68755	0.03357	1.83e-08
rs12667381	7	5541009	A	C	0.139	cg09022230	7	5457225	-0.34545	-5.68755	0.03357	1.83e-08
rs112631934	7	5536187	C	G	0.107	cg09022230	7	5457225	-0.36442	-5.39684	0.04816	9.04e-08
rs11975313	7	5530954	A	G	0.142	cg09022230	7	5457225	-0.36589	-6.00057	0.04913	3.03e-09
rs13243500	7	5525065	A	C	0.137	cg09022230	7	5457225	-0.35404	-5.67369	0.04862	1.98e-08
rs12539968	7	5531843	A	C	0.143	cg09022230	7	5457225	-0.36048	-5.98176	0.03397	3.38e-09
rs12532348	7	5532063	G	A	0.143	cg09022230	7	5457225	-0.36048	-5.98176	0.03397	3.38e-09
rs34636773	7	5532115	A	G	0.143	cg09022230	7	5457225	-0.36048	-5.98176	0.03397	3.38e-09
rs34207883	7	5498651	C	G	0.187	cg09022230	7	5457225	-0.39916	-7.61414	0.05253	7.79e-14
rs11970786	7	5528623	A	T	0.139	cg09022230	7	5457225	-0.36816	-5.96791	0.04902	3.67e-09
rs11769725	7	5528991	A	C	0.139	cg09022230	7	5457225	-0.36816	-5.96791	0.04902	3.67e-09
rs145175521	7	5499160	G	A	0.116	cg09022230	7	5457225	-0.49545	-7.58854	0.05577	9.37e-14
rs11762561	7	5491257	G	T	0.101	cg09022230	7	5457225	-0.39103	-5.62583	0.05533	2.59e-08
rs4292598	7	5502979	A	G	0.236	cg09022230	7	5457225	-0.33206	-6.70495	0.02057	3.9e-11
rs10951957	7	5530782	T	C	0.141	cg09022230	7	5457225	-0.36217	-5.92238	0.04893	4.78e-09
rs9690929	7	5500091	T	A	0.149	cg09022230	7	5457225	-0.48643	-8.42064	0.05431	1.83e-16
rs11772322	7	5506612	C	T	0.243	cg09022230	7	5457225	-0.33631	-6.8814	0.02137	1.23e-11
rs4454205	7	5502964	C	T	0.291	cg09022230	7	5457225	-0.31719	-6.83386	0.02091	1.68e-11
rs62441006	7	5506778	C	A	0.488	cg09022230	7	5457225	-0.2899	-6.81852	0.0218	1.86e-11
rs34794298	7	5535865	T	G	0.141	cg09022230	7	5457225	-0.35443	-5.86987	0.03382	6.48e-09
rs11762179	7	5515669	T	C	0.138	cg09022230	7	5457225	-0.36399	-5.88218	0.05079	6.04e-09
rs11762121	7	5530601	C	T	0.172	cg09022230	7	5457225	-0.34754	-6.26845	0.02134	6.07e-10
rs10265799	7	5503984	T	C	0.238	cg09022230	7	5457225	-0.33521	-6.77399	0.02074	2.49e-11
rs4724689	7	5505247	A	G	0.238	cg09022230	7	5457225	-0.33521	-6.77399	0.02074	2.49e-11
rs10272428	7	5506134	C	T	0.238	cg09022230	7	5457225	-0.33521	-6.77399	0.02074	2.49e-11
rs66483545	7	5495684	A	G	0.149	cg09022230	7	5457225	-0.48045	-8.3079	0.05446	4.39e-16
rs6948909	7	5506499	T	G	0.141	cg09022230	7	5457225	-0.48916	-8.29374	0.05482	4.89e-16
rs113042562	7	5499543	D	R	0.147	cg09022230	7	5457225	-0.48109	-8.2913	0.05417	4.99e-16
rs35742170	7	5499150	T	A	0.149	cg09022230	7	5457225	-0.47873	-8.26602	0.05431	6.06e-16
rs13222177	7	5498501	A	G	0.147	cg09022230	7	5457225	-0.48019	-8.26481	0.05411	6.12e-16
rs6946009	7	5506250	T	C	0.14	cg09022230	7	5457225	-0.48748	-8.25203	0.05476	6.75e-16
rs7801813	7	5505979	T	C	0.236	cg09022230	7	5457225	-0.33206	-6.70495	0.02057	3.9e-11
rs35543958	7	5498823	T	C	0.141	cg09022230	7	5457225	-0.48235	-8.16816	0.05472	1.28e-15
rs4612245	7	5502945	G	A	0.28	cg09022230	7	5457225	-0.31415	-6.68018	0.02119	4.58e-11
rs67156079	7	5492107	A	C	0.089	cg09022230	7	5457225	-0.42002	-5.79465	0.05543	9.98e-09
rs35354950	7	5499256	G	A	0.14	cg09022230	7	5457225	-0.47788	-8.05483	0.05467	3.03e-15
rs62441005	7	5503457	T	C	0.218	cg09022230	7	5457225	-0.31244	-6.11017	0.02061	1.58e-09
rs62441002	7	5502126	C	A	0.477	cg09022230	7	5457225	-0.30458	-7.19594	0.02295	1.48e-12
rs10951956	7	5521468	A	G	0.137	cg09022230	7	5457225	-0.3593	-5.75391	0.04877	1.26e-08
rs12537935	7	5523880	T	C	0.137	cg09022230	7	5457225	-0.3593	-5.75391	0.04877	1.26e-08
rs10951952	7	5502185	C	G	0.326	cg09022230	7	5457225	-0.3251	-7.19202	0.02933	1.52e-12
rs147361930	7	5499386	T	A	0.484	cg09022230	7	5457225	-0.30609	-7.19027	0.02282	1.53e-12
rs7808152	7	5508038	G	A	0.161	cg09022230	7	5457225	-0.40407	-7.16715	0.05325	1.8e-12
rs202033492	7	5499385	D	R	0.483	cg09022230	7	5457225	-0.30359	-7.14696	0.02282	2.06e-12
rs55657670	7	5497032	A	G	0.476	cg09022230	7	5457225	-0.30512	-7.146	0.02306	2.08e-12
rs723627	7	127967998	A	G	0.088	cg24107852	7	127960508	0.47003	6.13624	0.01762	1.35e-09
rs73230659	7	127974845	A	G	0.082	cg24107852	7	127960508	0.50491	6.45413	0.01763	1.93e-10
rs73230649	7	127961534	C	A	0.087	cg24107852	7	127960508	0.48461	6.30265	0.01766	4.93e-10
rs73230652	7	127963553	A	G	0.087	cg24107852	7	127960508	0.48461	6.30265	0.01766	4.93e-10
rs73230654	7	127969455	A	T	0.087	cg24107852	7	127960508	0.48461	6.30265	0.01766	4.93e-10
rs56007906	7	127979915	G	A	0.087	cg24107852	7	127960508	0.48461	6.30265	0.01766	4.93e-10
rs73721362	7	127974832	A	G	0.084	cg24107852	7	127960508	0.48943	6.28164	0.01762	5.6e-10
rs142141865	7	127941481	D	R	0.086	cg24107852	7	127960508	0.4837	6.27326	0.01763	5.9e-10
rs73230632	7	127947917	T	G	0.086	cg24107852	7	127960508	0.4837	6.27326	0.01763	5.9e-10
rs41281728	7	127953113	A	G	0.086	cg24107852	7	127960508	0.4837	6.27326	0.01763	5.9e-10
rs112448377	7	127909781	T	G	0.1	cg24107852	7	127960508	0.46189	6.20286	0.01774	9.05e-10
rs55667068	7	127980173	G	T	0.087	cg24107852	7	127960508	0.47296	6.16008	0.01763	1.17e-09
rs77083233	7	127961878	G	A	0.088	cg24107852	7	127960508	0.47003	6.13624	0.01762	1.35e-09
rs111807968	7	127964994	T	C	0.088	cg24107852	7	127960508	0.47003	6.13624	0.01762	1.35e-09
rs55913412	7	127966509	C	T	0.088	cg24107852	7	127960508	0.47003	6.13624	0.01762	1.35e-09
rs111641601	7	127969260	A	C	0.088	cg24107852	7	127960508	0.47003	6.13624	0.01762	1.35e-09
rs113962289	7	127969331	C	T	0.088	cg24107852	7	127960508	0.47003	6.13624	0.01762	1.35e-09
rs73230656	7	127973759	T	C	0.088	cg24107852	7	127960508	0.47003	6.13624	0.01762	1.35e-09
rs2402890	7	127977352	C	T	0.088	cg24107852	7	127960508	0.47003	6.13624	0.01762	1.35e-09
rs5887369	7	127977545	D	R	0.088	cg24107852	7	127960508	0.47003	6.13624	0.01762	1.35e-09
rs41281731	7	127978445	T	C	0.088	cg24107852	7	127960508	0.47003	6.13624	0.01762	1.35e-09
rs17151983	7	127946108	T	C	0.087	cg24107852	7	127960508	0.47199	6.13039	0.01762	1.4e-09
rs6980301	7	127951413	A	G	0.087	cg24107852	7	127960508	0.47199	6.13039	0.01762	1.4e-09
rs73230642	7	127956294	A	T	0.087	cg24107852	7	127960508	0.47199	6.13039	0.01762	1.4e-09
rs73228315	7	127940263	T	C	0.085	cg24107852	7	127960508	0.47725	6.116	0.01763	1.53e-09
rs73230631	7	127947299	A	G	0.087	cg24107852	7	127960508	0.46903	6.10646	0.01762	1.62e-09
rs73721355	7	127948025	T	C	0.087	cg24107852	7	127960508	0.46903	6.10646	0.01762	1.62e-09
rs73230633	7	127948472	A	T	0.087	cg24107852	7	127960508	0.46903	6.10646	0.01762	1.62e-09
rs17151987	7	127950414	C	T	0.087	cg24107852	7	127960508	0.46903	6.10646	0.01762	1.62e-09
rs6980001	7	127951366	A	C	0.087	cg24107852	7	127960508	0.46903	6.10646	0.01762	1.62e-09
rs17152000	7	127956424	G	A	0.087	cg24107852	7	127960508	0.46903	6.10646	0.01762	1.62e-09
rs17152002	7	127959221	A	G	0.087	cg24107852	7	127960508	0.46903	6.10646	0.01762	1.62e-09
rs6467174	7	127969867	G	A	0.088	cg24107852	7	127960508	0.4588	5.99841	0.01762	3.07e-09
rs73230657	7	127974336	T	C	0.088	cg24107852	7	127960508	0.4588	5.99841	0.01762	3.07e-09
rs7800186	7	127975289	A	T	0.088	cg24107852	7	127960508	0.4588	5.99841	0.01762	3.07e-09
rs143065437	7	127917256	A	G	0.087	cg24107852	7	127960508	0.46553	5.99148	0.01762	3.19e-09
rs73226694	7	127918050	A	G	0.087	cg24107852	7	127960508	0.46553	5.99148	0.01762	3.19e-09
rs73226697	7	127922834	G	A	0.087	cg24107852	7	127960508	0.46553	5.99148	0.01762	3.19e-09
rs73226699	7	127923751	A	G	0.087	cg24107852	7	127960508	0.46553	5.99148	0.01762	3.19e-09
rs113048914	7	127931416	A	G	0.087	cg24107852	7	127960508	0.46553	5.99148	0.01762	3.19e-09
rs140579308	7	127931540	C	G	0.087	cg24107852	7	127960508	0.46553	5.99148	0.01762	3.19e-09
rs112432905	7	127931583	A	G	0.087	cg24107852	7	127960508	0.46553	5.99148	0.01762	3.19e-09
rs142106450	7	127944234	I	R	0.088	cg24107852	7	127960508	0.45775	5.96835	0.0176	3.66e-09
rs11069	7	127944314	G	C	0.088	cg24107852	7	127960508	0.45775	5.96835	0.0176	3.66e-09
rs6467170	7	127945168	C	T	0.088	cg24107852	7	127960508	0.45775	5.96835	0.0176	3.66e-09
rs6952533	7	127946072	G	A	0.088	cg24107852	7	127960508	0.45775	5.96835	0.0176	3.66e-09
rs7804796	7	127953243	C	T	0.088	cg24107852	7	127960508	0.45775	5.96835	0.0176	3.66e-09
rs17151996	7	127954710	G	A	0.088	cg24107852	7	127960508	0.45775	5.96835	0.0176	3.66e-09
rs111571358	7	127910634	T	C	0.088	cg24107852	7	127960508	0.44413	5.73484	0.01762	1.4e-08
rs79439739	7	127911806	A	G	0.088	cg24107852	7	127960508	0.44413	5.73484	0.01762	1.4e-08
rs140329799	11	111528411	G	C	0.018	cg27207470	11	111848326	0.73247	5.67778	0.03518	1.93e-08
rs75607657	11	111543431	A	T	0.018	cg27207470	11	111848326	0.73247	5.67778	0.03518	1.93e-08
rs79064941	11	111544918	A	G	0.018	cg27207470	11	111848326	0.73247	5.67778	0.03518	1.93e-08
rs140495873	11	111735415	C	T	0.019	cg27207470	11	111848326	0.69354	5.43967	0.03514	7.18e-08
rs150287213	11	111757612	G	A	0.019	cg27207470	11	111848326	0.69354	5.43967	0.03514	7.18e-08
rs142799197	11	111759609	C	T	0.019	cg27207470	11	111848326	0.69354	5.43967	0.03514	7.18e-08
rs148524211	11	111771257	T	C	0.019	cg27207470	11	111848326	0.69354	5.43967	0.03514	7.18e-08
rs1772407	1	159005924	G	A	0.133	cg27541604	1	159046451	-0.34739	-5.8387	0.02175	7.76e-09
rs7525853	1	158992396	G	A	0.178	cg27541604	1	159046451	-0.2908	-5.62207	0.01395	2.64e-08
rs56248786	1	158994094	A	G	0.178	cg27541604	1	159046451	-0.2908	-5.62207	0.01395	2.64e-08
rs7540687	1	158996015	G	T	0.178	cg27541604	1	159046451	-0.2908	-5.62207	0.01395	2.64e-08
rs1101993	1	158996895	G	A	0.178	cg27541604	1	159046451	-0.2908	-5.62207	0.01395	2.64e-08
rs1101994	1	158996926	T	C	0.178	cg27541604	1	159046451	-0.2908	-5.62207	0.01395	2.64e-08
rs141520572	1	158997233	D	R	0.178	cg27541604	1	159046451	-0.2908	-5.62207	0.01395	2.64e-08
rs12139793	1	158997290	C	T	0.178	cg27541604	1	159046451	-0.2908	-5.62207	0.01395	2.64e-08
rs12120311	1	158997304	G	C	0.178	cg27541604	1	159046451	-0.2908	-5.62207	0.01395	2.64e-08
rs1101995	1	158997479	A	G	0.178	cg27541604	1	159046451	-0.2908	-5.62207	0.01395	2.64e-08
rs1101996	1	158998026	A	C	0.178	cg27541604	1	159046451	-0.2908	-5.62207	0.01395	2.64e-08
rs1101998	1	158999284	C	T	0.178	cg27541604	1	159046451	-0.2908	-5.62207	0.01395	2.64e-08
rs12059564	1	159000779	T	C	0.143	cg27541604	1	159046451	-0.35785	-6.28902	0.02213	5.36e-10
rs12061402	1	158996620	G	C	0.156	cg27541604	1	159046451	-0.3115	-5.67436	0.01947	1.97e-08
rs74122232	1	159006423	A	G	0.126	cg27541604	1	159046451	-0.35688	-5.87986	0.02536	6.12e-09
rs3754460	1	159006846	C	T	0.126	cg27541604	1	159046451	-0.35688	-5.87986	0.02536	6.12e-09
rs3768515	1	159010232	G	T	0.126	cg27541604	1	159046451	-0.35688	-5.87986	0.02536	6.12e-09
rs3768514	1	159010309	G	A	0.126	cg27541604	1	159046451	-0.35688	-5.87986	0.02536	6.12e-09
rs201604504	1	159045193	I	R	0.055	cg27541604	1	159046451	-0.81414	-9.62927	0.08703	8.48e-21
rs143891965	1	159043614	A	C	0.054	cg27541604	1	159046451	-0.81372	-9.5162	0.08699	2.25e-20
rs76839161	1	159045424	C	A	0.054	cg27541604	1	159046451	-0.81372	-9.5162	0.08699	2.25e-20
rs76430338	1	159045461	A	C	0.054	cg27541604	1	159046451	-0.81372	-9.5162	0.08699	2.25e-20
rs41264457	1	159046378	G	C	0.054	cg27541604	1	159046451	-0.81372	-9.5162	0.08699	2.25e-20
rs2298803	1	159046430	C	T	0.054	cg27541604	1	159046451	-0.81372	-9.5162	0.08699	2.25e-20
rs16841642	1	159046798	T	G	0.054	cg27541604	1	159046451	-0.81372	-9.5162	0.08699	2.25e-20
rs3834102	1	159047008	D	R	0.055	cg27541604	1	159046451	-0.81372	-9.5162	0.08699	2.25e-20
rs55786327	1	159049316	D	R	0.055	cg27541604	1	159046451	-0.81372	-9.5162	0.08699	2.25e-20
rs55719948	1	159049468	T	G	0.055	cg27541604	1	159046451	-0.81372	-9.5162	0.08699	2.25e-20
rs1935067	1	159050103	A	G	0.055	cg27541604	1	159046451	-0.81372	-9.5162	0.08699	2.25e-20
rs55791394	1	159050715	A	C	0.055	cg27541604	1	159046451	-0.81372	-9.5162	0.08699	2.25e-20
rs80323972	1	159051001	T	A	0.055	cg27541604	1	159046451	-0.81372	-9.5162	0.08699	2.25e-20
rs76789206	1	159051082	T	G	0.055	cg27541604	1	159046451	-0.81372	-9.5162	0.08699	2.25e-20
rs79288222	1	159054382	A	G	0.055	cg27541604	1	159046451	-0.81372	-9.5162	0.08699	2.25e-20
rs77197757	1	159039841	C	T	0.054	cg27541604	1	159046451	-0.80991	-9.41246	0.08697	5.48e-20
rs74555135	1	159043352	A	G	0.054	cg27541604	1	159046451	-0.80991	-9.41246	0.08697	5.48e-20
rs78916278	1	159044225	G	C	0.054	cg27541604	1	159046451	-0.80991	-9.41246	0.08697	5.48e-20
rs75491800	1	159045169	G	A	0.054	cg27541604	1	159046451	-0.80991	-9.41246	0.08697	5.48e-20
rs80033126	1	159052413	G	A	0.054	cg27541604	1	159046451	-0.80991	-9.41246	0.08697	5.48e-20
rs78756391	1	159060449	C	T	0.054	cg27541604	1	159046451	-0.80991	-9.41246	0.08697	5.48e-20
rs76457189	1	159061359	G	A	0.054	cg27541604	1	159046451	-0.80991	-9.41246	0.08697	5.48e-20
rs76576833	1	159062973	T	C	0.054	cg27541604	1	159046451	-0.80991	-9.41246	0.08697	5.48e-20
rs74122213	1	159001065	C	T	0.164	cg27541604	1	159046451	-0.33125	-6.16011	0.01343	1.17e-09
rs855871	1	159044651	G	A	0.113	cg27541604	1	159046451	-0.39131	-6.15697	0.00269	1.19e-09
rs56348543	1	158996579	G	A	0.178	cg27541604	1	159046451	-0.2908	-5.62207	0.01395	2.64e-08
rs12087333	1	158996771	G	A	0.178	cg27541604	1	159046451	-0.2908	-5.62207	0.01395	2.64e-08
rs3018316	1	159017958	G	T	0.128	cg27541604	1	159046451	-0.36469	-6.08068	0.03563	1.88e-09
rs149917423	1	159015766	D	R	0.13	cg27541604	1	159046451	-0.3635	-6.06892	0.03564	2.02e-09
rs2852695	1	159015933	G	A	0.13	cg27541604	1	159046451	-0.3635	-6.06892	0.03564	2.02e-09
rs2793844	1	159016967	A	G	0.13	cg27541604	1	159046451	-0.3635	-6.06892	0.03564	2.02e-09
rs146423674	1	159018942	G	A	0.13	cg27541604	1	159046451	-0.3635	-6.06892	0.03564	2.02e-09
rs3768523	1	159003998	C	G	0.126	cg27541604	1	159046451	-0.35688	-5.87986	0.02536	6.12e-09
rs3768519	1	159005224	G	C	0.126	cg27541604	1	159046451	-0.35688	-5.87986	0.02536	6.12e-09
rs75657667	1	159056271	C	T	0.054	cg27541604	1	159046451	-0.80991	-9.41246	0.08697	5.48e-20
rs16841682	1	159064818	C	A	0.055	cg27541604	1	159046451	-0.76063	-9.00477	0.04107	1.68e-18
rs76808161	1	159065430	G	T	0.055	cg27541604	1	159046451	-0.76063	-9.00477	0.04107	1.68e-18
rs76706394	1	159068032	T	C	0.055	cg27541604	1	159046451	-0.76063	-9.00477	0.04107	1.68e-18
rs112232953	1	159068261	I	R	0.055	cg27541604	1	159046451	-0.76063	-9.00477	0.04107	1.68e-18
rs11403286	1	158981901	I	R	0.045	cg27541604	1	159046451	-0.568	-5.97709	0.02307	3.47e-09
rs855867	1	159052847	G	A	0.113	cg27541604	1	159046451	-0.39131	-6.15697	0.00269	1.19e-09
rs79129191	1	159064652	C	T	0.056	cg27541604	1	159046451	-0.74527	-8.85162	0.04104	5.87e-18
rs12098223	1	159011694	A	G	0.127	cg27541604	1	159046451	-0.36084	-5.95728	0.02537	3.9e-09
rs3768513	1	159012217	A	T	0.127	cg27541604	1	159046451	-0.36084	-5.95728	0.02537	3.9e-09
rs2814771	1	159012238	T	C	0.127	cg27541604	1	159046451	-0.36084	-5.95728	0.02537	3.9e-09
rs2518555	1	159012535	A	G	0.127	cg27541604	1	159046451	-0.36084	-5.95728	0.02537	3.9e-09
rs2814770	1	159012772	T	C	0.127	cg27541604	1	159046451	-0.36084	-5.95728	0.02537	3.9e-09
rs2236584	1	159014645	G	A	0.127	cg27541604	1	159046451	-0.36084	-5.95728	0.02537	3.9e-09
rs3737522	1	159021445	G	A	0.127	cg27541604	1	159046451	-0.36084	-5.95728	0.02537	3.9e-09
rs7532207	1	159024424	T	A	0.127	cg27541604	1	159046451	-0.36084	-5.95728	0.02537	3.9e-09
rs6940	1	159024668	T	A	0.127	cg27541604	1	159046451	-0.36084	-5.95728	0.02537	3.9e-09
rs74359395	1	159027003	G	A	0.127	cg27541604	1	159046451	-0.36084	-5.95728	0.02537	3.9e-09
rs2793845	1	159032255	G	T	0.127	cg27541604	1	159046451	-0.36084	-5.95728	0.02537	3.9e-09
rs2814764	1	159064568	A	T	0.116	cg27541604	1	159046451	-0.37208	-5.91515	0.00108	4.99e-09
rs57678093	1	159069645	D	R	0.116	cg27541604	1	159046451	-0.37208	-5.91515	0.00108	4.99e-09
rs2518565	1	159070113	A	G	0.116	cg27541604	1	159046451	-0.37208	-5.91515	0.00108	4.99e-09
rs2814759	1	159070991	G	A	0.116	cg27541604	1	159046451	-0.37208	-5.91515	0.00108	4.99e-09
rs2078723	1	159072081	C	G	0.116	cg27541604	1	159046451	-0.37208	-5.91515	0.00108	4.99e-09
rs2814757	1	159072524	C	T	0.116	cg27541604	1	159046451	-0.37208	-5.91515	0.00108	4.99e-09
rs2852723	1	159073725	G	A	0.116	cg27541604	1	159046451	-0.37208	-5.91515	0.00108	4.99e-09
rs1616024	1	159004298	C	T	0.133	cg27541604	1	159046451	-0.34739	-5.8387	0.02175	7.76e-09
rs1633266	1	159005977	C	T	0.133	cg27541604	1	159046451	-0.34739	-5.8387	0.02175	7.76e-09
rs73021847	1	158980874	C	T	0.042	cg27541604	1	159046451	-0.57409	-5.84564	0.0229	7.45e-09
rs9970350	1	159074755	T	C	0.038	cg27541604	1	159046451	-0.70647	-6.95898	0.00554	7.34e-12
rs1633267	1	159010220	T	G	0.133	cg27541604	1	159046451	-0.34739	-5.8387	0.02175	7.76e-09
rs11265134	1	159014718	G	A	0.127	cg27541604	1	159046451	-0.36084	-5.95728	0.02537	3.9e-09
rs9970870	1	159074799	A	G	0.036	cg27541604	1	159046451	-0.70864	-6.7589	0.00572	2.75e-11
rs2518562	1	159055656	C	T	0.105	cg27541604	1	159046451	-0.41143	-6.27063	0.00422	5.99e-10
rs74122214	1	159001528	C	T	0.126	cg27541604	1	159046451	-0.35688	-5.87986	0.02536	6.12e-09
rs1101997	1	158998254	C	A	0.186	cg27541604	1	159046451	-0.29025	-5.70023	0.01419	1.71e-08
rs2852699	1	159018359	G	C	0.141	cg27541604	1	159046451	-0.32684	-5.67364	0.01861	1.98e-08
rs2814760	1	159070984	C	T	0.116	cg27541604	1	159046451	-0.37208	-5.91515	0.00108	4.99e-09
rs141760321	1	158997894	D	R	0.183	cg27541604	1	159046451	-0.29142	-5.65576	0.014	2.19e-08
rs2852696	1	159015984	G	A	0.125	cg27541604	1	159046451	-0.38495	-6.38665	0.03562	2.93e-10

## Sheet: Table S7
SNP	SNP Chromosome	SNP Position	A1	A2	MAF	CpG	CpG Chromosome	CpG Position	Beta	t-statistic	Effect Size	P-value
rs143891965	1	159043614	A	C	0.055	cg27541604	1	159046451	-0.36843	-5.7344	0.02625	1.37e-08
rs76430338	1	159045461	A	C	0.055	cg27541604	1	159046451	-0.36843	-5.7344	0.02625	1.37e-08
rs2298803	1	159046430	C	T	0.055	cg27541604	1	159046451	-0.36843	-5.7344	0.02625	1.37e-08
rs76839161	1	159045424	C	A	0.055	cg27541604	1	159046451	-0.36843	-5.7344	0.02625	1.37e-08
rs41264457	1	159046378	G	C	0.055	cg27541604	1	159046451	-0.36843	-5.7344	0.02625	1.37e-08
rs16841642	1	159046798	T	G	0.055	cg27541604	1	159046451	-0.36843	-5.7344	0.02625	1.37e-08
rs3834102	1	159047008	D	R	0.055	cg27541604	1	159046451	-0.36843	-5.7344	0.02625	1.37e-08
rs55786327	1	159049316	D	R	0.055	cg27541604	1	159046451	-0.36843	-5.7344	0.02625	1.37e-08
rs55719948	1	159049468	T	G	0.055	cg27541604	1	159046451	-0.36843	-5.7344	0.02625	1.37e-08
rs1935067	1	159050103	A	G	0.055	cg27541604	1	159046451	-0.36843	-5.7344	0.02625	1.37e-08
rs55791394	1	159050715	A	C	0.055	cg27541604	1	159046451	-0.36843	-5.7344	0.02625	1.37e-08
rs80323972	1	159051001	T	A	0.055	cg27541604	1	159046451	-0.36843	-5.7344	0.02625	1.37e-08
rs76789206	1	159051082	T	G	0.055	cg27541604	1	159046451	-0.36843	-5.7344	0.02625	1.37e-08
rs79288222	1	159054382	A	G	0.055	cg27541604	1	159046451	-0.36843	-5.7344	0.02625	1.37e-08
rs201604504	1	159045193	I	R	0.056	cg27541604	1	159046451	-0.3627	-5.69708	0.02625	1.69e-08
rs74555135	1	159043352	A	G	0.054	cg27541604	1	159046451	-0.35478	-5.45914	0.02625	6.32e-08
rs78916278	1	159044225	G	C	0.054	cg27541604	1	159046451	-0.35478	-5.45914	0.02625	6.32e-08
rs75491800	1	159045169	G	A	0.054	cg27541604	1	159046451	-0.35478	-5.45914	0.02625	6.32e-08
rs80033126	1	159052413	G	A	0.054	cg27541604	1	159046451	-0.35478	-5.45914	0.02625	6.32e-08
rs75657667	1	159056271	C	T	0.054	cg27541604	1	159046451	-0.35478	-5.45914	0.02625	6.32e-08
rs78756391	1	159060449	C	T	0.054	cg27541604	1	159046451	-0.35478	-5.45914	0.02625	6.32e-08
rs76457189	1	159061359	G	A	0.054	cg27541604	1	159046451	-0.35478	-5.45914	0.02625	6.32e-08
rs76576833	1	159062973	T	C	0.054	cg27541604	1	159046451	-0.35478	-5.45914	0.02625	6.32e-08
rs79129191	1	159064652	C	T	0.056	cg27541604	1	159046451	-0.34387	-5.43117	0.04468	7.35e-08
rs9970350	1	159074755	T	C	0.037	cg27541604	1	159046451	-0.41105	-5.42439	0.06284	7.63e-08
rs77197757	1	159039841	C	T	0.054	cg27541604	1	159046451	-0.34992	-5.40878	0.02616	8.3e-08
rs35543958	7	5498823	T	C	0.142	cg09022230	7	5457225	-0.28739	-5.92273	0.06501	4.63e-09
rs11767141	7	5508673	A	G	0.148	cg09022230	7	5457225	-0.27572	-5.65885	0.05861	2.1e-08
rs9690929	7	5500091	T	A	0.151	cg09022230	7	5457225	-0.28817	-6.06146	0.06409	2.04e-09
rs35354950	7	5499256	G	A	0.141	cg09022230	7	5457225	-0.2809	-5.76443	0.06483	1.15e-08
rs113042562	7	5499543	D	R	0.149	cg09022230	7	5457225	-0.2749	-5.75404	0.06375	1.22e-08
rs11772322	7	5506612	C	T	0.245	cg09022230	7	5457225	-0.25092	-6.30426	0.05784	4.69e-10
rs62441005	7	5503457	T	C	0.221	cg09022230	7	5457225	-0.23749	-5.71282	0.05652	1.55e-08
rs66483545	7	5495684	A	G	0.15	cg09022230	7	5457225	-0.28357	-5.96044	0.06398	3.71e-09
rs6961091	7	5509239	A	G	0.146	cg09022230	7	5457225	-0.27749	-5.69081	0.05844	1.75e-08
rs6948909	7	5506499	T	G	0.142	cg09022230	7	5457225	-0.28798	-5.93525	0.06501	4.3e-09
rs35742170	7	5499150	T	A	0.15	cg09022230	7	5457225	-0.28242	-5.92375	0.06352	4.6e-09
rs6946009	7	5506250	T	C	0.141	cg09022230	7	5457225	-0.28669	-5.90103	0.06483	5.25e-09
rs4292598	7	5502979	A	G	0.238	cg09022230	7	5457225	-0.2601	-6.47274	0.05484	1.64e-10
rs7801813	7	5505979	T	C	0.238	cg09022230	7	5457225	-0.2601	-6.47274	0.05484	1.64e-10
rs13222177	7	5498501	A	G	0.149	cg09022230	7	5457225	-0.28049	-5.87011	0.06398	6.29e-09
rs10265799	7	5503984	T	C	0.239	cg09022230	7	5457225	-0.2577	-6.41123	0.05484	2.42e-10
rs4724689	7	5505247	A	G	0.239	cg09022230	7	5457225	-0.2577	-6.41123	0.05484	2.42e-10
rs10272428	7	5506134	C	T	0.239	cg09022230	7	5457225	-0.2577	-6.41123	0.05484	2.42e-10
rs73721362	7	127974832	A	G	0.082	cg24107852	7	127960508	0.41092	5.53254	0.00898	4.23e-08
rs77083233	7	127961878	G	A	0.085	cg24107852	7	127960508	0.40433	5.52655	0.00898	4.37e-08
rs111807968	7	127964994	T	C	0.085	cg24107852	7	127960508	0.40433	5.52655	0.00898	4.37e-08
rs55913412	7	127966509	C	T	0.085	cg24107852	7	127960508	0.40433	5.52655	0.00898	4.37e-08
rs723627	7	127967998	A	G	0.085	cg24107852	7	127960508	0.40433	5.52655	0.00898	4.37e-08
rs111641601	7	127969260	A	C	0.085	cg24107852	7	127960508	0.40433	5.52655	0.00898	4.37e-08
rs73230656	7	127973759	T	C	0.085	cg24107852	7	127960508	0.40433	5.52655	0.00898	4.37e-08
rs5887369	7	127977545	D	R	0.085	cg24107852	7	127960508	0.40433	5.52655	0.00898	4.37e-08
rs41281731	7	127978445	T	C	0.085	cg24107852	7	127960508	0.40433	5.52655	0.00898	4.37e-08
rs73226694	7	127918050	A	G	0.084	cg24107852	7	127960508	0.40937	5.52511	0.00821	4.41e-08
rs73226697	7	127922834	G	A	0.084	cg24107852	7	127960508	0.40937	5.52511	0.00821	4.41e-08
rs73226699	7	127923751	A	G	0.084	cg24107852	7	127960508	0.40937	5.52511	0.00821	4.41e-08
rs140579308	7	127931540	C	G	0.084	cg24107852	7	127960508	0.40937	5.52511	0.00821	4.41e-08
rs112432905	7	127931583	A	G	0.084	cg24107852	7	127960508	0.40937	5.52511	0.00821	4.41e-08
rs111571358	7	127910634	T	C	0.085	cg24107852	7	127960508	0.40602	5.52106	0.00821	4.5e-08
rs79439739	7	127911806	A	G	0.085	cg24107852	7	127960508	0.40602	5.52106	0.00821	4.5e-08
rs6467174	7	127969867	G	A	0.085	cg24107852	7	127960508	0.4023	5.51167	0.00898	4.74e-08
rs73230657	7	127974336	T	C	0.085	cg24107852	7	127960508	0.4023	5.51167	0.00898	4.74e-08
rs7800186	7	127975289	A	T	0.085	cg24107852	7	127960508	0.4023	5.51167	0.00898	4.74e-08
rs73230631	7	127947299	A	G	0.084	cg24107852	7	127960508	0.40043	5.45735	0.00898	6.38e-08
rs73721355	7	127948025	T	C	0.084	cg24107852	7	127960508	0.40043	5.45735	0.00898	6.38e-08
rs73230633	7	127948472	A	T	0.084	cg24107852	7	127960508	0.40043	5.45735	0.00898	6.38e-08
rs17151987	7	127950414	C	T	0.084	cg24107852	7	127960508	0.40043	5.45735	0.00898	6.38e-08
rs6980001	7	127951366	A	C	0.084	cg24107852	7	127960508	0.40043	5.45735	0.00898	6.38e-08
rs17152000	7	127956424	G	A	0.084	cg24107852	7	127960508	0.40043	5.45735	0.00898	6.38e-08
rs17152002	7	127959221	A	G	0.084	cg24107852	7	127960508	0.40043	5.45735	0.00898	6.38e-08
rs142106450	7	127944234	I	R	0.085	cg24107852	7	127960508	0.3984	5.44254	0.00895	6.91e-08
rs11069	7	127944314	G	C	0.085	cg24107852	7	127960508	0.3984	5.44254	0.00895	6.91e-08
rs6467170	7	127945168	C	T	0.085	cg24107852	7	127960508	0.3984	5.44254	0.00895	6.91e-08
rs6952533	7	127946072	G	A	0.085	cg24107852	7	127960508	0.3984	5.44254	0.00895	6.91e-08
rs7804796	7	127953243	C	T	0.085	cg24107852	7	127960508	0.3984	5.44254	0.00895	6.91e-08
rs17151996	7	127954710	G	A	0.085	cg24107852	7	127960508	0.3984	5.44254	0.00895	6.91e-08
rs55667068	7	127980173	G	T	0.084	cg24107852	7	127960508	0.39722	5.41207	0.00898	8.15e-08
rs113962289	7	127969331	C	T	0.085	cg24107852	7	127960508	0.40433	5.52655	0.00898	4.37e-08
rs2402890	7	127977352	C	T	0.085	cg24107852	7	127960508	0.40433	5.52655	0.00898	4.37e-08
rs143065437	7	127917256	A	G	0.084	cg24107852	7	127960508	0.40937	5.52511	0.00821	4.41e-08
rs113048914	7	127931416	A	G	0.084	cg24107852	7	127960508	0.40937	5.52511	0.00821	4.41e-08
rs7004288	8	133029287	A	G	0.313	cg18919106	8	132918665	0.25636	6.11971	0.00519	1.44e-09
rs4358787	8	132951557	C	G	0.313	cg18919106	8	132918665	0.25672	6.11367	0.00538	1.5e-09
rs9297837	8	132958609	T	A	0.313	cg18919106	8	132918665	0.25672	6.11367	0.00538	1.5e-09
rs200108810	8	132993281	D	R	0.319	cg18919106	8	132918665	0.25379	6.10077	0.00513	1.62e-09
rs16904559	8	132968404	G	A	0.302	cg18919106	8	132918665	0.25437	6.04032	0.00455	2.32e-09
rs140665251	8	132993283	D	R	0.322	cg18919106	8	132918665	0.24925	6.01064	0.00507	2.76e-09
rs4301433	8	133030354	A	G	0.313	cg18919106	8	132918665	0.2463	5.90249	0.00475	5.21e-09
rs28718815	8	132920372	G	A	0.357	cg18919106	8	132918665	0.23976	5.89881	0.00453	5.32e-09
rs1553271	8	132995451	C	A	0.315	cg18919106	8	132918665	0.24486	5.84357	0.00438	7.33e-09
rs57926613	8	133019749	T	A	0.302	cg18919106	8	132918665	0.24807	5.83193	0.00468	7.84e-09
rs10092149	8	132955345	G	A	0.299	cg18919106	8	132918665	0.24709	5.80007	0.00462	9.41e-09
rs10104261	8	132958460	T	A	0.299	cg18919106	8	132918665	0.24709	5.80007	0.00462	9.41e-09
rs16904557	8	132966522	C	A	0.299	cg18919106	8	132918665	0.24709	5.80007	0.00462	9.41e-09
rs10093138	8	132980287	G	A	0.299	cg18919106	8	132918665	0.24709	5.80007	0.00462	9.41e-09
rs141130288	8	132998635	D	R	0.299	cg18919106	8	132918665	0.24709	5.80007	0.00462	9.41e-09
rs16904573	8	133016044	G	A	0.299	cg18919106	8	132918665	0.24709	5.80007	0.00462	9.41e-09
rs1501063	8	133017999	T	A	0.299	cg18919106	8	132918665	0.24709	5.80007	0.00462	9.41e-09
rs77882863	8	133018178	T	C	0.299	cg18919106	8	132918665	0.24709	5.80007	0.00462	9.41e-09
rs4546642	8	132943652	C	T	0.344	cg18919106	8	132918665	0.23218	5.64571	0.00459	2.26e-08
rs148689866	8	132975048	C	T	0.3	cg18919106	8	132918665	0.24493	5.76237	0.00455	1.17e-08
rs28568684	8	132958152	G	A	0.272	cg18919106	8	132918665	0.25409	5.71629	0.00507	1.52e-08
rs1392871	8	132921874	T	G	0.343	cg18919106	8	132918665	0.23357	5.68382	0.00465	1.82e-08
rs4278135	8	132960843	C	T	0.344	cg18919106	8	132918665	0.23366	5.68319	0.00471	1.83e-08
rs7465452	8	132975316	A	T	0.344	cg18919106	8	132918665	0.23366	5.68319	0.00471	1.83e-08
rs147505015	8	132977229	A	C	0.343	cg18919106	8	132918665	0.23366	5.68319	0.00471	1.83e-08
rs6471019	8	132995179	A	G	0.344	cg18919106	8	132918665	0.23366	5.68319	0.00471	1.83e-08
rs6471020	8	132995278	C	G	0.344	cg18919106	8	132918665	0.23366	5.68319	0.00471	1.83e-08
rs16904564	8	132996599	C	A	0.344	cg18919106	8	132918665	0.23366	5.68319	0.00471	1.83e-08
rs9297839	8	133001977	A	G	0.344	cg18919106	8	132918665	0.23366	5.68319	0.00471	1.83e-08
rs16904570	8	133010362	C	T	0.344	cg18919106	8	132918665	0.23366	5.68319	0.00471	1.83e-08
rs57043549	8	133012442	C	T	0.344	cg18919106	8	132918665	0.23366	5.68319	0.00471	1.83e-08
rs16904572	8	133015953	G	A	0.344	cg18919106	8	132918665	0.23366	5.68319	0.00471	1.83e-08
rs77294196	8	133020560	A	C	0.344	cg18919106	8	132918665	0.23366	5.68319	0.00471	1.83e-08
rs28562159	8	133021149	A	G	0.344	cg18919106	8	132918665	0.23366	5.68319	0.00471	1.83e-08
rs200821953	8	133022651	D	R	0.344	cg18919106	8	132918665	0.23366	5.68319	0.00471	1.83e-08
rs59525889	8	132926003	C	A	0.344	cg18919106	8	132918665	0.23218	5.64571	0.00459	2.26e-08
rs4593525	8	132930851	A	G	0.344	cg18919106	8	132918665	0.23218	5.64571	0.00459	2.26e-08
rs7004185	8	132934401	G	A	0.344	cg18919106	8	132918665	0.23218	5.64571	0.00459	2.26e-08
rs28414750	8	132935104	A	G	0.344	cg18919106	8	132918665	0.23218	5.64571	0.00459	2.26e-08
rs7012536	8	132940896	G	A	0.344	cg18919106	8	132918665	0.23218	5.64571	0.00459	2.26e-08
rs10435559	8	132937016	T	G	0.344	cg18919106	8	132918665	0.23102	5.62889	0.00445	2.48e-08
rs4415291	8	132943759	G	A	0.336	cg18919106	8	132918665	0.22877	5.54753	0.00479	3.89e-08
rs28571760	8	132943816	A	G	0.336	cg18919106	8	132918665	0.22877	5.54753	0.00479	3.89e-08
rs35398271	8	133011827	D	R	0.329	cg18919106	8	132918665	0.25844	6.24499	0.00492	6.75e-10
rs10101450	8	132914886	A	G	0.372	cg18919106	8	132918665	0.22094	5.45263	0.00424	6.55e-08
rs1553269	8	132915114	C	T	0.372	cg18919106	8	132918665	0.22094	5.45263	0.00424	6.55e-08
rs28627763	8	132916459	C	T	0.372	cg18919106	8	132918665	0.22094	5.45263	0.00424	6.55e-08
rs7812977	8	132919616	A	G	0.372	cg18919106	8	132918665	0.22094	5.45263	0.00424	6.55e-08
rs28653332	8	132920591	A	G	0.372	cg18919106	8	132918665	0.22094	5.45263	0.00424	6.55e-08
rs10956619	8	132943993	G	A	0.366	cg18919106	8	132918665	0.21597	5.37636	0.00423	9.88e-08
rs10956621	8	132946941	G	A	0.328	cg18919106	8	132918665	0.25516	6.16484	0.00491	1.1e-09
rs4354289	8	132951511	A	G	0.328	cg18919106	8	132918665	0.25516	6.16484	0.00491	1.1e-09
rs10112200	8	132953350	G	A	0.328	cg18919106	8	132918665	0.25516	6.16484	0.00491	1.1e-09
rs10104588	8	132958505	A	G	0.328	cg18919106	8	132918665	0.25516	6.16484	0.00491	1.1e-09
rs11992180	8	132961556	G	A	0.328	cg18919106	8	132918665	0.25516	6.16484	0.00491	1.1e-09
rs12235037	8	132962701	T	C	0.328	cg18919106	8	132918665	0.25516	6.16484	0.00491	1.1e-09
rs10104710	8	132972429	A	T	0.328	cg18919106	8	132918665	0.25516	6.16484	0.00491	1.1e-09
rs7826663	8	132974851	A	G	0.328	cg18919106	8	132918665	0.25516	6.16484	0.00491	1.1e-09
rs7824207	8	132990003	T	G	0.328	cg18919106	8	132918665	0.25516	6.16484	0.00491	1.1e-09
rs10107805	8	132990761	G	T	0.328	cg18919106	8	132918665	0.25516	6.16484	0.00491	1.1e-09
rs13439822	8	133005629	T	C	0.328	cg18919106	8	132918665	0.25516	6.16484	0.00491	1.1e-09
rs12682582	8	133005854	T	G	0.328	cg18919106	8	132918665	0.25516	6.16484	0.00491	1.1e-09
rs1062064	8	133012216	T	G	0.328	cg18919106	8	132918665	0.25516	6.16484	0.00491	1.1e-09
rs16904571	8	133012761	A	T	0.328	cg18919106	8	132918665	0.25516	6.16484	0.00491	1.1e-09
rs3812466	8	133013341	A	G	0.328	cg18919106	8	132918665	0.25516	6.16484	0.00491	1.1e-09
rs77039447	8	133017391	A	G	0.328	cg18919106	8	132918665	0.25516	6.16484	0.00491	1.1e-09
rs10956627	8	133027400	A	G	0.328	cg18919106	8	132918665	0.25516	6.16484	0.00491	1.1e-09
rs142799197	11	111759609	C	T	0.02	cg27207470	11	111848326	0.75737	5.80385	0	9.21e-09
rs148524211	11	111771257	T	C	0.02	cg27207470	11	111848326	0.75737	5.80385	0	9.21e-09
rs140329799	11	111528411	G	C	0.019	cg27207470	11	111848326	0.77041	5.83021	0	7.92e-09
rs75607657	11	111543431	A	T	0.019	cg27207470	11	111848326	0.77041	5.83021	0	7.92e-09
rs79064941	11	111544918	A	G	0.019	cg27207470	11	111848326	0.77041	5.83021	0	7.92e-09
rs140495873	11	111735415	C	T	0.02	cg27207470	11	111848326	0.75737	5.80385	0	9.21e-09
rs150287213	11	111757612	G	A	0.02	cg27207470	11	111848326	0.75737	5.80385	0	9.21e-09
rs143098130	11	111804039	C	A	0.019	cg27207470	11	111848326	0.7638	5.77818	0	1.07e-08
rs76539854	11	111909910	T	C	0.019	cg27207470	11	111848326	0.7638	5.77818	0	1.07e-08
rs75512233	16	57591835	T	C	0.025	cg04276536	16	57567813	0.69153	5.81971	0.02661	8.41e-09
rs117471714	16	57598416	A	G	0.019	cg04276536	16	57567813	0.73971	5.51344	0.02653	4.7e-08

## Sheet: Table S8
SNP	SNP Chromosome	SNP Position	A1	A2	MAF	CpG	CpG Chromosome	CpG Position	Beta	t-statistic	Effect Size	P-value
rs66483545	7	5495684	A	G	0.152	cg09022230	7	5457225	-0.3421	-7.56422	0.05659	1.03e-13
rs9690929	7	5500091	T	A	0.153	cg09022230	7	5457225	-0.33865	-7.48294	0.05673	1.84e-13
rs6948909	7	5506499	T	G	0.143	cg09022230	7	5457225	-0.33997	-7.32184	0.05835	5.76e-13
rs13222177	7	5498501	A	G	0.15	cg09022230	7	5457225	-0.33298	-7.31455	0.05655	6.06e-13
rs35742170	7	5499150	T	A	0.151	cg09022230	7	5457225	-0.33078	-7.27721	0.05636	7.86e-13
rs113042562	7	5499543	D	R	0.151	cg09022230	7	5457225	-0.3295	-7.24021	0.0565	1.02e-12
rs6946009	7	5506250	T	C	0.142	cg09022230	7	5457225	-0.33274	-7.14117	0.05825	2.01e-12
rs35354950	7	5499256	G	A	0.142	cg09022230	7	5457225	-0.33308	-7.13326	0.05825	2.13e-12
rs35543958	7	5498823	T	C	0.143	cg09022230	7	5457225	-0.33152	-7.12109	0.0583	2.31e-12
rs11772322	7	5506612	C	T	0.246	cg09022230	7	5457225	-0.26469	-6.91986	0.05514	9e-12
rs6961091	7	5509239	A	G	0.148	cg09022230	7	5457225	-0.31766	-6.77506	0.06143	2.35e-11
rs11767141	7	5508673	A	G	0.149	cg09022230	7	5457225	-0.31486	-6.72583	0.06138	3.24e-11
rs10265799	7	5503984	T	C	0.239	cg09022230	7	5457225	-0.2603	-6.70174	0.05124	3.79e-11
rs4724689	7	5505247	A	G	0.239	cg09022230	7	5457225	-0.2603	-6.70174	0.05124	3.79e-11
rs10272428	7	5506134	C	T	0.239	cg09022230	7	5457225	-0.2603	-6.70174	0.05124	3.79e-11
rs4292598	7	5502979	A	G	0.237	cg09022230	7	5457225	-0.25656	-6.59878	0.05052	7.36e-11
rs7801813	7	5505979	T	C	0.237	cg09022230	7	5457225	-0.25656	-6.59878	0.05052	7.36e-11
rs4454205	7	5502964	C	T	0.292	cg09022230	7	5457225	-0.23792	-6.48932	0.05235	1.48e-10
rs11762179	7	5515669	T	C	0.138	cg09022230	7	5457225	-0.31216	-6.38451	0.05413	2.85e-10
rs10951957	7	5530782	T	C	0.142	cg09022230	7	5457225	-0.30225	-6.29662	0.05361	4.91e-10
rs11975313	7	5530954	A	G	0.143	cg09022230	7	5457225	-0.30166	-6.29087	0.05359	5.09e-10
rs11970786	7	5528623	A	T	0.139	cg09022230	7	5457225	-0.30693	-6.28744	0.05413	5.2e-10
rs11769725	7	5528991	A	C	0.139	cg09022230	7	5457225	-0.30693	-6.28744	0.05413	5.2e-10
rs10951956	7	5521468	A	G	0.137	cg09022230	7	5457225	-0.30928	-6.27279	0.04358	5.69e-10
rs12537935	7	5523880	T	C	0.137	cg09022230	7	5457225	-0.30928	-6.27279	0.04358	5.69e-10
rs7786990	7	5499748	G	T	0.192	cg09022230	7	5457225	-0.25938	-6.24242	0.04974	6.85e-10
rs13243500	7	5525065	A	C	0.137	cg09022230	7	5457225	-0.306	-6.21084	0.04384	8.3e-10
rs34207883	7	5498651	C	G	0.189	cg09022230	7	5457225	-0.25597	-6.13936	0.04945	1.28e-09
rs12539968	7	5531843	A	C	0.142	cg09022230	7	5457225	-0.29322	-6.13184	0.05147	1.34e-09
rs12532348	7	5532063	G	A	0.142	cg09022230	7	5457225	-0.29322	-6.13184	0.05147	1.34e-09
rs34636773	7	5532115	A	G	0.142	cg09022230	7	5457225	-0.29322	-6.13184	0.05147	1.34e-09
rs74646899	7	5553003	C	G	0.102	cg09022230	7	5457225	-0.33242	-6.12593	0.05936	1.39e-09
rs11762121	7	5530601	C	T	0.172	cg09022230	7	5457225	-0.26752	-6.0822	0.04725	1.8e-09
rs112631934	7	5536187	C	G	0.106	cg09022230	7	5457225	-0.32427	-6.04977	0.05941	2.19e-09
rs111765269	7	5545590	T	G	0.104	cg09022230	7	5457225	-0.32645	-6.04631	0.05931	2.23e-09
rs4612245	7	5502945	G	A	0.279	cg09022230	7	5457225	-0.22321	-5.98876	0.05104	3.14e-09
rs7808152	7	5508038	G	A	0.164	cg09022230	7	5457225	-0.2665	-5.97189	0.05101	3.47e-09
rs145175521	7	5499160	G	A	0.118	cg09022230	7	5457225	-0.30842	-5.96988	0.05667	3.51e-09
rs34794298	7	5535865	T	G	0.14	cg09022230	7	5457225	-0.28211	-5.86981	0.05063	6.29e-09
rs10951958	7	5537205	A	G	0.138	cg09022230	7	5457225	-0.28256	-5.85276	0.05063	6.94e-09
rs7789109	7	5537779	T	C	0.138	cg09022230	7	5457225	-0.28256	-5.85276	0.05063	6.94e-09
rs142757270	7	5538682	D	R	0.138	cg09022230	7	5457225	-0.28256	-5.85276	0.05063	6.94e-09
rs12667381	7	5541009	A	C	0.138	cg09022230	7	5457225	-0.28256	-5.85276	0.05063	6.94e-09
rs117440560	7	5511470	A	G	0.078	cg09022230	7	5457225	-0.35842	-5.82838	0.05055	7.99e-09
rs4724703	7	5531559	T	C	0.242	cg09022230	7	5457225	-0.23139	-5.82474	0.04956	8.16e-09
rs62441005	7	5503457	T	C	0.22	cg09022230	7	5457225	-0.23247	-5.78081	0.0428	1.05e-08
rs76980354	7	5576671	C	A	0.063	cg09022230	7	5457225	-0.3709	-5.60948	0.06523	2.76e-08
rs143098130	11	111804039	C	A	0.018	cg27207470	11	111848326	0.88352	6.33011	0	4e-10
rs76539854	11	111909910	T	C	0.018	cg27207470	11	111848326	0.88352	6.33011	0	4e-10
rs140329799	11	111528411	G	C	0.018	cg27207470	11	111848326	0.8787	6.29397	0	4.99e-10
rs75607657	11	111543431	A	T	0.018	cg27207470	11	111848326	0.8787	6.29397	0	4.99e-10
rs79064941	11	111544918	A	G	0.018	cg27207470	11	111848326	0.8787	6.29397	0	4.99e-10
rs140495873	11	111735415	C	T	0.019	cg27207470	11	111848326	0.85104	6.16836	0	1.07e-09
rs150287213	11	111757612	G	A	0.019	cg27207470	11	111848326	0.85104	6.16836	0	1.07e-09
rs142799197	11	111759609	C	T	0.019	cg27207470	11	111848326	0.85104	6.16836	0	1.07e-09
rs148524211	11	111771257	T	C	0.019	cg27207470	11	111848326	0.85104	6.16836	0	1.07e-09
rs143075112	11	111403377	T	C	0.02	cg27207470	11	111848326	0.75181	5.49196	0	5.28e-08
rs10775189	15	67038912	T	C	0.376	cg01678084	15	67022087	0.22551	5.6307	0.01143	2.45e-08
rs34190282	15	67038049	A	C	0.367	cg01678084	15	67022087	0.2234	5.52684	0.01273	4.36e-08
rs7161970	15	67036982	T	C	0.368	cg01678084	15	67022087	0.22304	5.52526	0.01264	4.4e-08
rs11631842	15	67038656	T	C	0.367	cg01678084	15	67022087	0.22005	5.43738	0.01249	7.1e-08
rs12916708	15	67023914	A	G	0.369	cg01678084	15	67022087	0.21979	5.43497	0.01257	7.2e-08
rs11636457	15	67021996	A	G	0.368	cg01678084	15	67022087	0.21996	5.42817	0.01261	7.47e-08
rs67514947	15	67022311	D	R	0.368	cg01678084	15	67022087	0.21996	5.42817	0.01261	7.47e-08
rs11630260	15	67030031	A	G	0.368	cg01678084	15	67022087	0.21837	5.40548	0.01247	8.44e-08
rs72758514	15	67032028	G	A	0.368	cg01678084	15	67022087	0.21837	5.40548	0.01247	8.44e-08
rs61180547	15	67034695	D	R	0.367	cg01678084	15	67022087	0.21829	5.39257	0.01239	9.05e-08
rs58470342	15	67035754	D	R	0.367	cg01678084	15	67022087	0.218	5.38846	0.01244	9.25e-08
rs35283599	15	67036674	C	T	0.367	cg01678084	15	67022087	0.218	5.38846	0.01244	9.25e-08

## Sheet: Table S9
SNP	SNP Chromosome	SNP Position	A1	A2	MAF	CpG	CpG Chromosome	CpG Position	Beta	t-statistic	Effect Size	P-value
rs41264457	1	159046378	G	C	0.05	cg27541604	1	159046451	-0.46173	-7.31388	0.04597	6.76e-13
rs201604504	1	159045193	I	R	0.051	cg27541604	1	159046451	-0.46263	-7.37492	0.04593	4.42e-13
rs2298803	1	159046430	C	T	0.05	cg27541604	1	159046451	-0.46173	-7.31388	0.04597	6.76e-13
rs3834102	1	159047008	D	R	0.051	cg27541604	1	159046451	-0.46173	-7.31388	0.04597	6.76e-13
rs9970870	1	159074799	A	G	0.028	cg27541604	1	159046451	-0.47542	-5.70938	0	1.64e-08
rs9970350	1	159074755	T	C	0.031	cg27541604	1	159046451	-0.44585	-5.707	0.04471	1.66e-08
rs55786327	1	159049316	D	R	0.051	cg27541604	1	159046451	-0.46173	-7.31388	0.04597	6.76e-13
rs76839161	1	159045424	C	A	0.05	cg27541604	1	159046451	-0.46173	-7.31388	0.04597	6.76e-13
rs55791394	1	159050715	A	C	0.051	cg27541604	1	159046451	-0.46173	-7.31388	0.04597	6.76e-13
rs80323972	1	159051001	T	A	0.051	cg27541604	1	159046451	-0.46173	-7.31388	0.04597	6.76e-13
rs79288222	1	159054382	A	G	0.051	cg27541604	1	159046451	-0.46173	-7.31388	0.04597	6.76e-13
rs143891965	1	159043614	A	C	0.05	cg27541604	1	159046451	-0.46431	-7.3115	0.04601	6.87e-13
rs77197757	1	159039841	C	T	0.05	cg27541604	1	159046451	-0.45933	-7.22757	0.04601	1.23e-12
rs78916278	1	159044225	G	C	0.05	cg27541604	1	159046451	-0.45469	-7.14939	0.04593	2.1e-12
rs74555135	1	159043352	A	G	0.049	cg27541604	1	159046451	-0.45723	-7.14646	0.04597	2.14e-12
rs75491800	1	159045169	G	A	0.049	cg27541604	1	159046451	-0.45723	-7.14646	0.04597	2.14e-12
rs76576833	1	159062973	T	C	0.05	cg27541604	1	159046451	-0.45723	-7.14646	0.04597	2.14e-12
rs79129191	1	159064652	C	T	0.05	cg27541604	1	159046451	-0.45723	-7.14646	0.04597	2.14e-12
rs16841682	1	159064818	C	A	0.05	cg27541604	1	159046451	-0.45723	-7.14646	0.04597	2.14e-12
rs76808161	1	159065430	G	T	0.05	cg27541604	1	159046451	-0.45723	-7.14646	0.04597	2.14e-12
rs76706394	1	159068032	T	C	0.05	cg27541604	1	159046451	-0.45723	-7.14646	0.04597	2.14e-12
rs112232953	1	159068261	I	R	0.05	cg27541604	1	159046451	-0.45723	-7.14646	0.04597	2.14e-12
rs78756391	1	159060449	C	T	0.05	cg27541604	1	159046451	-0.45469	-7.14939	0.04593	2.1e-12
rs75657667	1	159056271	C	T	0.05	cg27541604	1	159046451	-0.45723	-7.14646	0.04597	2.14e-12
rs76457189	1	159061359	G	A	0.05	cg27541604	1	159046451	-0.45723	-7.14646	0.04597	2.14e-12
rs1935067	1	159050103	A	G	0.051	cg27541604	1	159046451	-0.4583	-7.30084	0.04601	7.4e-13
rs76430338	1	159045461	A	C	0.05	cg27541604	1	159046451	-0.46173	-7.31388	0.04597	6.76e-13
rs16841642	1	159046798	T	G	0.05	cg27541604	1	159046451	-0.46173	-7.31388	0.04597	6.76e-13
rs55719948	1	159049468	T	G	0.051	cg27541604	1	159046451	-0.46173	-7.31388	0.04597	6.76e-13
rs76789206	1	159051082	T	G	0.051	cg27541604	1	159046451	-0.46173	-7.31388	0.04597	6.76e-13
rs80033126	1	159052413	G	A	0.05	cg27541604	1	159046451	-0.45723	-7.14646	0.04597	2.14e-12
